# Supplementary material
Source: publisher figshare collection journal article supplement (https://acs.figshare.com/ndownloader/files/8765941)
Supplement: Supplementary file 1 [file 8765941]

HEADER    PLASMA PROTEIN                          29-AUG-00   1E7H              
TITLE     HUMAN SERUM ALBUMIN COMPLEXED WITH HEXADECANOIC ACID                  
TITLE    2 (PALMITIC ACID)                                                      
COMPND    MOL_ID: 1;                                                            
COMPND   2 MOLECULE: SERUM ALBUMIN;                                             
COMPND   3 CHAIN: A;                                                            
COMPND   4 ENGINEERED: YES                                                      
SOURCE    MOL_ID: 1;                                                            
SOURCE   2 ORGANISM_SCIENTIFIC: HOMO SAPIENS;                                   
SOURCE   3 ORGANISM_COMMON: HUMAN;                                              
SOURCE   4 ORGANISM_TAXID: 9606;                                                
SOURCE   5 CELLULAR_LOCATION: SERUM;                                            
SOURCE   6 GENE: ALB;                                                           
SOURCE   7 EXPRESSION_SYSTEM: SACCHAROMYCES CEREVISIAE;                         
SOURCE   8 EXPRESSION_SYSTEM_TAXID: 4932                                        
KEYWDS    PLASMA PROTEIN, METAL-BINDING, LIPID-BINDING                          
EXPDTA    X-RAY DIFFRACTION                                                     
AUTHOR    A.A.BHATTACHARYA,T.GRUENE,S.CURRY                                     
REVDAT   2   24-FEB-09 1E7H    1       VERSN                                    
REVDAT   1   08-DEC-00 1E7H    0                                                
JRNL        AUTH   A.A.BHATTACHARYA,T.GRUNE,S.CURRY                             
JRNL        TITL   CRYSTALLOGRAPHIC ANALYSIS REVEALS COMMON MODES OF            
JRNL        TITL 2 BINDING OF MEDIUM AND LONG-CHAIN FATTY ACIDS TO              
JRNL        TITL 3 HUMAN SERUM ALBUMIN                                          
JRNL        REF    J.MOL.BIOL.                   V. 303   721 2000              
JRNL        REFN                   ISSN 0022-2836                               
JRNL        PMID   11061971                                                     
JRNL        DOI    10.1006/JMBI.2000.4158                                       
REMARK   2                                                                      
REMARK   2 RESOLUTION.    2.43 ANGSTROMS.                                       
REMARK   3                                                                      
REMARK   3 REFINEMENT.                                                          
REMARK   3   PROGRAM     : X-PLOR 3.851                                         
REMARK   3   AUTHORS     : BRUNGER                                              
REMARK   3                                                                      
REMARK   3  DATA USED IN REFINEMENT.                                            
REMARK   3   RESOLUTION RANGE HIGH (ANGSTROMS) : 2.43                           
REMARK   3   RESOLUTION RANGE LOW  (ANGSTROMS) : 12.00                          
REMARK   3   DATA CUTOFF            (SIGMA(F)) : 0.0                            
REMARK   3   DATA CUTOFF HIGH         (ABS(F)) : 10000000.00                    
REMARK   3   DATA CUTOFF LOW          (ABS(F)) : 0.001000                       
REMARK   3   COMPLETENESS (WORKING+TEST)   (%) : 93.5                           
REMARK   3   NUMBER OF REFLECTIONS             : 24122                          
REMARK   3                                                                      
REMARK   3  FIT TO DATA USED IN REFINEMENT.                                     
REMARK   3   CROSS-VALIDATION METHOD          : THROUGHOUT                      
REMARK   3   FREE R VALUE TEST SET SELECTION  : RANDOM                          
REMARK   3   R VALUE            (WORKING SET) : 0.214                           
REMARK   3   FREE R VALUE                     : 0.272                           
REMARK   3   FREE R VALUE TEST SET SIZE   (%) : 4.8                             
REMARK   3   FREE R VALUE TEST SET COUNT      : 1154                            
REMARK   3   ESTIMATED ERROR OF FREE R VALUE  : 0.008                           
REMARK   3                                                                      
REMARK   3  FIT IN THE HIGHEST RESOLUTION BIN.                                  
REMARK   3   TOTAL NUMBER OF BINS USED           : 8                            
REMARK   3   BIN RESOLUTION RANGE HIGH       (A) : 2.43                         
REMARK   3   BIN RESOLUTION RANGE LOW        (A) : 2.54                         
REMARK   3   BIN COMPLETENESS (WORKING+TEST) (%) : 87.0                         
REMARK   3   REFLECTIONS IN BIN    (WORKING SET) : 2621                         
REMARK   3   BIN R VALUE           (WORKING SET) : 0.334                        
REMARK   3   BIN FREE R VALUE                    : 0.337                        
REMARK   3   BIN FREE R VALUE TEST SET SIZE  (%) : 4.6                          
REMARK   3   BIN FREE R VALUE TEST SET COUNT     : 126                          
REMARK   3   ESTIMATED ERROR OF BIN FREE R VALUE : 0.030                        
REMARK   3                                                                      
REMARK   3  NUMBER OF NON-HYDROGEN ATOMS USED IN REFINEMENT.                    
REMARK   3   PROTEIN ATOMS            : 4443                                    
REMARK   3   NUCLEIC ACID ATOMS       : 0                                       
REMARK   3   HETEROGEN ATOMS          : 111                                     
REMARK   3   SOLVENT ATOMS            : 29                                      
REMARK   3                                                                      
REMARK   3  B VALUES.                                                           
REMARK   3   FROM WILSON PLOT           (A**2) : 34.5                           
REMARK   3   MEAN B VALUE      (OVERALL, A**2) : 51.6                           
REMARK   3   OVERALL ANISOTROPIC B VALUE.                                       
REMARK   3    B11 (A**2) : 0.00                                                 
REMARK   3    B22 (A**2) : 0.00                                                 
REMARK   3    B33 (A**2) : 0.00                                                 
REMARK   3    B12 (A**2) : 0.00                                                 
REMARK   3    B13 (A**2) : 0.00                                                 
REMARK   3    B23 (A**2) : 0.00                                                 
REMARK   3                                                                      
REMARK   3  ESTIMATED COORDINATE ERROR.                                         
REMARK   3   ESD FROM LUZZATI PLOT        (A) : 0.33                            
REMARK   3   ESD FROM SIGMAA              (A) : 0.45                            
REMARK   3   LOW RESOLUTION CUTOFF        (A) : 12.00                           
REMARK   3                                                                      
REMARK   3  CROSS-VALIDATED ESTIMATED COORDINATE ERROR.                         
REMARK   3   ESD FROM C-V LUZZATI PLOT    (A) : 0.42                            
REMARK   3   ESD FROM C-V SIGMAA          (A) : 0.47                            
REMARK   3                                                                      
REMARK   3  RMS DEVIATIONS FROM IDEAL VALUES.                                   
REMARK   3   BOND LENGTHS                 (A) : 0.006                           
REMARK   3   BOND ANGLES            (DEGREES) : 1.2                             
REMARK   3   DIHEDRAL ANGLES        (DEGREES) : 24.6                            
REMARK   3   IMPROPER ANGLES        (DEGREES) : 0.65                            
REMARK   3                                                                      
REMARK   3  ISOTROPIC THERMAL MODEL : RESTRAINED                                
REMARK   3                                                                      
REMARK   3  ISOTROPIC THERMAL FACTOR RESTRAINTS.    RMS    SIGMA                
REMARK   3   MAIN-CHAIN BOND              (A**2) : 1.71  ; 1.50                 
REMARK   3   MAIN-CHAIN ANGLE             (A**2) : 2.90  ; 2.00                 
REMARK   3   SIDE-CHAIN BOND              (A**2) : 2.69  ; 2.00                 
REMARK   3   SIDE-CHAIN ANGLE             (A**2) : 4.48  ; 2.50                 
REMARK   3                                                                      
REMARK   3  NCS MODEL : NULL                                                    
REMARK   3                                                                      
REMARK   3  NCS RESTRAINTS.                         RMS   SIGMA/WEIGHT          
REMARK   3   GROUP  1  POSITIONAL            (A) : NULL  ; NULL                 
REMARK   3   GROUP  1  B-FACTOR           (A**2) : NULL  ; NULL                 
REMARK   3                                                                      
REMARK   3  PARAMETER FILE  1  : PROTEIN_REP.PARAM                              
REMARK   3  PARAMETER FILE  2  : PALM.PAR                                       
REMARK   3  PARAMETER FILE  3  : NULL                                           
REMARK   3  PARAMETER FILE  4  : NULL                                           
REMARK   3  TOPOLOGY FILE  1   : TOPHCSDX.PRO                                   
REMARK   3  TOPOLOGY FILE  2   : TOPH19.SOL                                     
REMARK   3  TOPOLOGY FILE  3   : PALM.TOP                                       
REMARK   3  TOPOLOGY FILE  4   : NULL                                           
REMARK   3                                                                      
REMARK   3  OTHER REFINEMENT REMARKS: BULK SOLVENT MODEL USED RESIDUES ASP      
REMARK   3  1, ALA 2, GLY 584 AND LEU 585 ARE DISORDERED AND HAVE NOT BEEN      
REMARK   3  INCLUDED IN THE MODEL.                                              
REMARK   4                                                                      
REMARK   4 1E7H COMPLIES WITH FORMAT V. 3.15, 01-DEC-08                         
REMARK 100                                                                      
REMARK 100 THIS ENTRY HAS BEEN PROCESSED BY PDBE ON 29-AUG-00.                  
REMARK 100 THE PDBE ID CODE IS EBI-5329.                                        
REMARK 200                                                                      
REMARK 200 EXPERIMENTAL DETAILS                                                 
REMARK 200  EXPERIMENT TYPE                : X-RAY DIFFRACTION                  
REMARK 200  DATE OF DATA COLLECTION        : 15-OCT-98                          
REMARK 200  TEMPERATURE           (KELVIN) : 298.0                              
REMARK 200  PH                             : 7.00                               
REMARK 200  NUMBER OF CRYSTALS USED        : 1                                  
REMARK 200                                                                      
REMARK 200  SYNCHROTRON              (Y/N) : Y                                  
REMARK 200  RADIATION SOURCE               : EMBL/DESY, HAMBURG                 
REMARK 200  BEAMLINE                       : X31                                
REMARK 200  X-RAY GENERATOR MODEL          : NULL                               
REMARK 200  MONOCHROMATIC OR LAUE    (M/L) : M                                  
REMARK 200  WAVELENGTH OR RANGE        (A) : 0.87                               
REMARK 200  MONOCHROMATOR                  : DOUBLE CRYSTAL SI(111)             
REMARK 200  OPTICS                         : TOROIDAL MIRROR                    
REMARK 200                                                                      
REMARK 200  DETECTOR TYPE                  : IMAGE PLATE                        
REMARK 200  DETECTOR MANUFACTURER          : MARRESEARCH                        
REMARK 200  INTENSITY-INTEGRATION SOFTWARE : MOSFLM                             
REMARK 200  DATA SCALING SOFTWARE          : CCP4                               
REMARK 200                                                                      
REMARK 200  NUMBER OF UNIQUE REFLECTIONS   : 24122                              
REMARK 200  RESOLUTION RANGE HIGH      (A) : 2.440                              
REMARK 200  RESOLUTION RANGE LOW       (A) : 11.990                             
REMARK 200  REJECTION CRITERIA  (SIGMA(I)) : 0.000                              
REMARK 200                                                                      
REMARK 200 OVERALL.                                                             
REMARK 200  COMPLETENESS FOR RANGE     (%) : 92.9                               
REMARK 200  DATA REDUNDANCY                : 2.700                              
REMARK 200  R MERGE                    (I) : 0.04600                            
REMARK 200  R SYM                      (I) : 0.04600                            
REMARK 200  <I/SIGMA(I)> FOR THE DATA SET  : 9.4000                             
REMARK 200                                                                      
REMARK 200 IN THE HIGHEST RESOLUTION SHELL.                                     
REMARK 200  HIGHEST RESOLUTION SHELL, RANGE HIGH (A) : 2.44                     
REMARK 200  HIGHEST RESOLUTION SHELL, RANGE LOW  (A) : 2.57                     
REMARK 200  COMPLETENESS FOR SHELL     (%) : 87.8                               
REMARK 200  DATA REDUNDANCY IN SHELL       : 2.70                               
REMARK 200  R MERGE FOR SHELL          (I) : 0.17800                            
REMARK 200  R SYM FOR SHELL            (I) : 0.17800                            
REMARK 200  <I/SIGMA(I)> FOR SHELL         : 4.000                              
REMARK 200                                                                      
REMARK 200 DIFFRACTION PROTOCOL: SINGLE WAVELENGTH                              
REMARK 200 METHOD USED TO DETERMINE THE STRUCTURE: MOLECULAR REPLACEMENT        
REMARK 200 SOFTWARE USED: X-PLOR 3.851                                          
REMARK 200 STARTING MODEL: 1BJ5                                                 
REMARK 200                                                                      
REMARK 200 REMARK: NULL                                                         
REMARK 280                                                                      
REMARK 280 CRYSTAL                                                              
REMARK 280 SOLVENT CONTENT, VS   (%): 54                                        
REMARK 280 MATTHEWS COEFFICIENT, VM (ANGSTROMS**3/DA): 2.66                     
REMARK 280                                                                      
REMARK 280 CRYSTALLIZATION CONDITIONS: NULL                                     
REMARK 290                                                                      
REMARK 290 CRYSTALLOGRAPHIC SYMMETRY                                            
REMARK 290 SYMMETRY OPERATORS FOR SPACE GROUP: C 1 2 1                          
REMARK 290                                                                      
REMARK 290      SYMOP   SYMMETRY                                                
REMARK 290     NNNMMM   OPERATOR                                                
REMARK 290       1555   X,Y,Z                                                   
REMARK 290       2555   -X,Y,-Z                                                 
REMARK 290       3555   X+1/2,Y+1/2,Z                                           
REMARK 290       4555   -X+1/2,Y+1/2,-Z                                         
REMARK 290                                                                      
REMARK 290     WHERE NNN -> OPERATOR NUMBER                                     
REMARK 290           MMM -> TRANSLATION VECTOR                                  
REMARK 290                                                                      
REMARK 290 CRYSTALLOGRAPHIC SYMMETRY TRANSFORMATIONS                            
REMARK 290 THE FOLLOWING TRANSFORMATIONS OPERATE ON THE ATOM/HETATM             
REMARK 290 RECORDS IN THIS ENTRY TO PRODUCE CRYSTALLOGRAPHICALLY                
REMARK 290 RELATED MOLECULES.                                                   
REMARK 290   SMTRY1   1  1.000000  0.000000  0.000000        0.00000            
REMARK 290   SMTRY2   1  0.000000  1.000000  0.000000        0.00000            
REMARK 290   SMTRY3   1  0.000000  0.000000  1.000000        0.00000            
REMARK 290   SMTRY1   2 -1.000000  0.000000  0.000000        0.00000            
REMARK 290   SMTRY2   2  0.000000  1.000000  0.000000        0.00000            
REMARK 290   SMTRY3   2  0.000000  0.000000 -1.000000        0.00000            
REMARK 290   SMTRY1   3  1.000000  0.000000  0.000000       95.04500            
REMARK 290   SMTRY2   3  0.000000  1.000000  0.000000       19.37500            
REMARK 290   SMTRY3   3  0.000000  0.000000  1.000000        0.00000            
REMARK 290   SMTRY1   4 -1.000000  0.000000  0.000000       95.04500            
REMARK 290   SMTRY2   4  0.000000  1.000000  0.000000       19.37500            
REMARK 290   SMTRY3   4  0.000000  0.000000 -1.000000        0.00000            
REMARK 290                                                                      
REMARK 290 REMARK: NULL                                                         
REMARK 300                                                                      
REMARK 300 BIOMOLECULE: 1                                                       
REMARK 300 SEE REMARK 350 FOR THE AUTHOR PROVIDED AND/OR PROGRAM                
REMARK 300 GENERATED ASSEMBLY INFORMATION FOR THE STRUCTURE IN                  
REMARK 300 THIS ENTRY.  THE REMARK MAY ALSO PROVIDE INFORMATION ON              
REMARK 300 BURIED SURFACE AREA.                                                 
REMARK 350                                                                      
REMARK 350 GENERATING THE BIOMOLECULE                                           
REMARK 350 COORDINATES FOR A COMPLETE MULTIMER REPRESENTING THE KNOWN           
REMARK 350 BIOLOGICALLY SIGNIFICANT OLIGOMERIZATION STATE OF THE                
REMARK 350 MOLECULE CAN BE GENERATED BY APPLYING BIOMT TRANSFORMATIONS          
REMARK 350 GIVEN BELOW.  BOTH NON-CRYSTALLOGRAPHIC AND                          
REMARK 350 CRYSTALLOGRAPHIC OPERATIONS ARE GIVEN.                               
REMARK 350                                                                      
REMARK 350 BIOMOLECULE:  1                                                      
REMARK 350 AUTHOR DETERMINED BIOLOGICAL UNIT: MONOMERIC                         
REMARK 350 SOFTWARE DETERMINED QUATERNARY STRUCTURE: MONOMERIC                  
REMARK 350 SOFTWARE USED: PQS                                                   
REMARK 350 APPLY THE FOLLOWING TO CHAINS: A                                     
REMARK 350   BIOMT1   1  1.000000  0.000000  0.000000        0.00000            
REMARK 350   BIOMT2   1  0.000000  1.000000  0.000000        0.00000            
REMARK 350   BIOMT3   1  0.000000  0.000000  1.000000        0.00000            
REMARK 400                                                                      
REMARK 400 COMPOUND                                                             
REMARK 400  SERUM ALBUMIN, REGULATES THE COLLOIDAL OSMOTIC PRESSURE OF BLOOD    
REMARK 400  IT BINDS TO WATER, CA++, NA+, K+, FATTY ACIDS, HORMONES,            
REMARK 400  BILIRUBIN AND DRUGS                                                 
REMARK 465                                                                      
REMARK 465 MISSING RESIDUES                                                     
REMARK 465 THE FOLLOWING RESIDUES WERE NOT LOCATED IN THE                       
REMARK 465 EXPERIMENT. (M=MODEL NUMBER; RES=RESIDUE NAME; C=CHAIN               
REMARK 465 IDENTIFIER; SSSEQ=SEQUENCE NUMBER; I=INSERTION CODE):                
REMARK 465                                                                      
REMARK 465   M RES C SSSEQI                                                     
REMARK 465     ASP A     1                                                      
REMARK 465     ALA A     2                                                      
REMARK 465     GLY A   584                                                      
REMARK 465     LEU A   585                                                      
REMARK 470                                                                      
REMARK 470 MISSING ATOM                                                         
REMARK 470 THE FOLLOWING RESIDUES HAVE MISSING ATOMS (M=MODEL NUMBER;           
REMARK 470 RES=RESIDUE NAME; C=CHAIN IDENTIFIER; SSEQ=SEQUENCE NUMBER;          
REMARK 470 I=INSERTION CODE):                                                   
REMARK 470   M RES CSSEQI  ATOMS                                                
REMARK 470     HIS A   3    ND1  CE1  NE2  CD2                                  
REMARK 470     LYS A   4    CG   CD   CE   NZ                                   
REMARK 470     GLU A   6    CG   CD   OE1  OE2                                  
REMARK 470     LYS A  41    CG   CD   CE   NZ                                   
REMARK 470     GLU A  48    CG   CD   OE1  OE2                                  
REMARK 470     GLU A  57    CG   CD   OE1  OE2                                  
REMARK 470     GLU A  60    CG   CD   OE1  OE2                                  
REMARK 470     LYS A  64    CE   NZ                                             
REMARK 470     THR A  79    OG1  CG2                                            
REMARK 470     GLU A  82    CG   CD   OE1  OE2                                  
REMARK 470     GLN A  94    CG   CD   OE1  NE2                                  
REMARK 470     ASP A 108    CG   OD1  OD2                                       
REMARK 470     ASN A 111    CG   OD1  ND2                                       
REMARK 470     GLU A 119    CG   CD   OE1  OE2                                  
REMARK 470     LYS A 137    CG   CD   CE   NZ                                   
REMARK 470     LYS A 181    CE   NZ                                             
REMARK 470     GLU A 184    CG   CD   OE1  OE2                                  
REMARK 470     ARG A 186    CZ   NH1  NH2                                       
REMARK 470     LYS A 195    NZ                                                  
REMARK 470     ARG A 197    CG   CD   NE   CZ   NH1  NH2                        
REMARK 470     GLN A 204    CG   CD   OE1  NE2                                  
REMARK 470     GLU A 227    CG   CD   OE1  OE2                                  
REMARK 470     LYS A 240    CD   CE   NZ                                        
REMARK 470     GLU A 244    CD   OE1  OE2                                       
REMARK 470     LYS A 262    CG   CD   CE   NZ                                   
REMARK 470     LYS A 276    CG   CD   CE   NZ                                   
REMARK 470     GLU A 280    CG   CD   OE1  OE2                                  
REMARK 470     ASP A 301    CG   OD1  OD2                                       
REMARK 470     LYS A 313    CG   CD   CE   NZ                                   
REMARK 470     ASP A 314    CG   OD1  OD2                                       
REMARK 470     LYS A 317    CG   CD   CE   NZ                                   
REMARK 470     LYS A 351    CE   NZ                                             
REMARK 470     LYS A 372    CG   CD   CE   NZ                                   
REMARK 470     LYS A 389    CG   CD   CE   NZ                                   
REMARK 470     GLU A 396    CG   CD   OE1  OE2                                  
REMARK 470     LYS A 402    CD   CE   NZ                                        
REMARK 470     GLU A 425    CD   OE1  OE2                                       
REMARK 470     LYS A 439    CG   CD   CE   NZ                                   
REMARK 470     LYS A 466    CE   NZ                                             
REMARK 470     GLU A 495    CG   CD   OE1  OE2                                  
REMARK 470     GLU A 505    CG   CD   OE1  OE2                                  
REMARK 470     GLU A 518    CG   CD   OE1  OE2                                  
REMARK 470     LYS A 519    CE   NZ                                             
REMARK 470     ARG A 521    CZ   NH1  NH2                                       
REMARK 470     LYS A 524    CE   NZ                                             
REMARK 470     LYS A 538    CG   CD   CE   NZ                                   
REMARK 470     LYS A 541    CE   NZ                                             
REMARK 470     LYS A 545    CD   CE   NZ                                        
REMARK 470     LYS A 557    CD   CE   NZ                                        
REMARK 470     LYS A 560    CD   CE   NZ                                        
REMARK 470     LYS A 564    CG   CD   CE   NZ                                   
REMARK 470     THR A 566    OG1  CG2                                            
REMARK 470     GLU A 570    CG   CD   OE1  OE2                                  
REMARK 470     LYS A 573    CD   CE   NZ                                        
REMARK 500                                                                      
REMARK 500 GEOMETRY AND STEREOCHEMISTRY                                         
REMARK 500 SUBTOPIC: COVALENT BOND ANGLES                                       
REMARK 500                                                                      
REMARK 500 THE STEREOCHEMICAL PARAMETERS OF THE FOLLOWING RESIDUES              
REMARK 500 HAVE VALUES WHICH DEVIATE FROM EXPECTED VALUES BY MORE               
REMARK 500 THAN 6*RMSD (M=MODEL NUMBER; RES=RESIDUE NAME; C=CHAIN               
REMARK 500 IDENTIFIER; SSEQ=SEQUENCE NUMBER; I=INSERTION CODE).                 
REMARK 500                                                                      
REMARK 500 STANDARD TABLE:                                                      
REMARK 500 FORMAT: (10X,I3,1X,A3,1X,A1,I4,A1,3(1X,A4,2X),12X,F5.1)              
REMARK 500                                                                      
REMARK 500 EXPECTED VALUES PROTEIN: ENGH AND HUBER, 1999                        
REMARK 500 EXPECTED VALUES NUCLEIC ACID: CLOWNEY ET AL 1996                     
REMARK 500                                                                      
REMARK 500  M RES CSSEQI ATM1   ATM2   ATM3                                     
REMARK 500    PRO A 110   C   -  N   -  CA  ANGL. DEV. =  15.5 DEGREES          
REMARK 500    PRO A 303   C   -  N   -  CA  ANGL. DEV. =  11.9 DEGREES          
REMARK 500    LYS A 313   N   -  CA  -  C   ANGL. DEV. = -17.0 DEGREES          
REMARK 500                                                                      
REMARK 500 REMARK: NULL                                                         
REMARK 500                                                                      
REMARK 500 GEOMETRY AND STEREOCHEMISTRY                                         
REMARK 500 SUBTOPIC: TORSION ANGLES                                             
REMARK 500                                                                      
REMARK 500 TORSION ANGLES OUTSIDE THE EXPECTED RAMACHANDRAN REGIONS:            
REMARK 500 (M=MODEL NUMBER; RES=RESIDUE NAME; C=CHAIN IDENTIFIER;               
REMARK 500 SSEQ=SEQUENCE NUMBER; I=INSERTION CODE).                             
REMARK 500 STANDARD TABLE:                                                      
REMARK 500 FORMAT:(10X,I3,1X,A3,1X,A1,I4,A1,4X,F7.2,3X,F7.2)                    
REMARK 500                                                                      
REMARK 500 EXPECTED VALUES: GJ KLEYWEGT AND TA JONES (1996). PHI/PSI-           
REMARK 500 CHOLOGY: RAMACHANDRAN REVISITED. STRUCTURE 4, 1395 - 1400            
REMARK 500                                                                      
REMARK 500  M RES CSSEQI        PSI       PHI                                   
REMARK 500    TYR A  30      -67.75    -97.01                                   
REMARK 500    GLU A  57       -8.03    -59.87                                   
REMARK 500    PRO A 110     -176.98    -50.54                                   
REMARK 500    PRO A 118     -170.85    -54.04                                   
REMARK 500    VAL A 120      -38.66    -34.76                                   
REMARK 500    ASN A 130       85.15   -172.90                                   
REMARK 500    ALA A 151      -70.54    -36.11                                   
REMARK 500    CYS A 169       19.04    -69.27                                   
REMARK 500    GLN A 170       25.64   -140.83                                   
REMARK 500    ASP A 173       74.44   -111.80                                   
REMARK 500    CYS A 177      -68.07    -93.57                                   
REMARK 500    PHE A 223       62.95   -115.98                                   
REMARK 500    LYS A 274       43.67    -77.36                                   
REMARK 500    VAL A 293      152.95    -46.62                                   
REMARK 500    PRO A 303      179.28    -49.38                                   
REMARK 500    VAL A 310      -63.21   -121.26                                   
REMARK 500    ALA A 322       77.49   -168.02                                   
REMARK 500    ALA A 364      -71.36    -36.96                                   
REMARK 500    PRO A 366      -74.75    -40.67                                   
REMARK 500    HIS A 367      -33.57    -34.15                                   
REMARK 500    LYS A 372       55.81    -95.30                                   
REMARK 500    PRO A 468      150.05    -45.59                                   
REMARK 500    VAL A 469      -29.46   -146.13                                   
REMARK 500    PRO A 499      131.90    -37.81                                   
REMARK 500    PHE A 507       40.09   -100.69                                   
REMARK 500    LYS A 557        0.07    -52.96                                   
REMARK 500    ASP A 563       71.79     62.28                                   
REMARK 500                                                                      
REMARK 500 REMARK: NULL                                                         
REMARK 525                                                                      
REMARK 525 SOLVENT                                                              
REMARK 525                                                                      
REMARK 525 THE SOLVENT MOLECULES HAVE CHAIN IDENTIFIERS THAT                    
REMARK 525 INDICATE THE POLYMER CHAIN WITH WHICH THEY ARE MOST                  
REMARK 525 CLOSELY ASSOCIATED. THE REMARK LISTS ALL THE SOLVENT                 
REMARK 525 MOLECULES WHICH ARE MORE THAN 5A AWAY FROM THE                       
REMARK 525 NEAREST POLYMER CHAIN (M = MODEL NUMBER;                             
REMARK 525 RES=RESIDUE NAME; C=CHAIN IDENTIFIER; SSEQ=SEQUENCE                  
REMARK 525 NUMBER; I=INSERTION CODE):                                           
REMARK 610                                                                      
REMARK 610 MISSING HETEROATOM                                                   
REMARK 610 THE FOLLOWING RESIDUES HAVE MISSING ATOMS (M=MODEL NUMBER;           
REMARK 610 RES=RESIDUE NAME; C=CHAIN IDENTIFIER; SSEQ=SEQUENCE NUMBER;          
REMARK 610 I=INSERTION CODE):                                                   
REMARK 610   M RES C SSEQI                                                      
REMARK 610     PLM A 1002                                                       
REMARK 610     PLM A 1003                                                       
REMARK 610     PLM A 1005                                                       
REMARK 610     PLM A 1007                                                       
REMARK 800                                                                      
REMARK 800 SITE                                                                 
REMARK 800 SITE_IDENTIFIER: AC1                                                 
REMARK 800 EVIDENCE_CODE: SOFTWARE                                              
REMARK 800 SITE_DESCRIPTION: BINDING SITE FOR RESIDUE PLM A1001                 
REMARK 800                                                                      
REMARK 800 SITE_IDENTIFIER: AC2                                                 
REMARK 800 EVIDENCE_CODE: SOFTWARE                                              
REMARK 800 SITE_DESCRIPTION: BINDING SITE FOR RESIDUE PLM A1002                 
REMARK 800                                                                      
REMARK 800 SITE_IDENTIFIER: AC3                                                 
REMARK 800 EVIDENCE_CODE: SOFTWARE                                              
REMARK 800 SITE_DESCRIPTION: BINDING SITE FOR RESIDUE PLM A1003                 
REMARK 800                                                                      
REMARK 800 SITE_IDENTIFIER: AC4                                                 
REMARK 800 EVIDENCE_CODE: SOFTWARE                                              
REMARK 800 SITE_DESCRIPTION: BINDING SITE FOR RESIDUE PLM A1004                 
REMARK 800                                                                      
REMARK 800 SITE_IDENTIFIER: AC5                                                 
REMARK 800 EVIDENCE_CODE: SOFTWARE                                              
REMARK 800 SITE_DESCRIPTION: BINDING SITE FOR RESIDUE PLM A1005                 
REMARK 800                                                                      
REMARK 800 SITE_IDENTIFIER: AC6                                                 
REMARK 800 EVIDENCE_CODE: SOFTWARE                                              
REMARK 800 SITE_DESCRIPTION: BINDING SITE FOR RESIDUE PLM A1006                 
REMARK 800                                                                      
REMARK 800 SITE_IDENTIFIER: AC7                                                 
REMARK 800 EVIDENCE_CODE: SOFTWARE                                              
REMARK 800 SITE_DESCRIPTION: BINDING SITE FOR RESIDUE PLM A1007                 
REMARK 900                                                                      
REMARK 900 RELATED ENTRIES                                                      
REMARK 900 RELATED ID: 1AO6   RELATED DB: PDB                                   
REMARK 900  CRYSTAL STRUCTURE OF HUMAN SERUM ALBUMIN                            
REMARK 900 RELATED ID: 1BJ5   RELATED DB: PDB                                   
REMARK 900  HUMAN SERUM ALBUMIN COMPLEXED WITH MYRISTIC ACID                    
REMARK 900 RELATED ID: 1BKE   RELATED DB: PDB                                   
REMARK 900  HUMAN SERUM ALBUMIN IN A COMPLEX WITH MYRISTIC ACID AND             
REMARK 900  TRI-IODOBENZOIC ACID                                                
REMARK 900 RELATED ID: 1BM0   RELATED DB: PDB                                   
REMARK 900  CRYSTAL STRUCTURE OF HUMAN SERUM ALBUMIN                            
REMARK 900 RELATED ID: 1E78   RELATED DB: PDB                                   
REMARK 900  CRYSTAL STRUCTURE OF HUMAN SERUM ALBUMIN                            
REMARK 900 RELATED ID: 1E7A   RELATED DB: PDB                                   
REMARK 900  CRYSTAL STRUCTURE OF HUMAN SERUM ALBUMIN COMPLEXED WITH             
REMARK 900  THE GENERAL ANESTHETIC PROPOFOL                                     
REMARK 900 RELATED ID: 1E7B   RELATED DB: PDB                                   
REMARK 900  CRYSTAL STRUCTURE OF HUMAN SERUM ALBUMIN COMPLEXED WITH             
REMARK 900  HALOTHANE                                                           
REMARK 900 RELATED ID: 1E7C   RELATED DB: PDB                                   
REMARK 900  HUMAN SERUM ALBUMIN COMPLEXED WITH MYRISTIC ACID AND THE            
REMARK 900  GENERAL ANESTHETIC HALOTHANE                                        
REMARK 900 RELATED ID: 1E7E   RELATED DB: PDB                                   
REMARK 900  HUMAN SERUM ALBUMIN COMPLEXED WITH DECANOIC ACID                    
REMARK 900 RELATED ID: 1E7F   RELATED DB: PDB                                   
REMARK 900  HUMAN SERUM ALBUMIN COMPLEXED WITH DODECANOIC ACID                  
REMARK 900 RELATED ID: 1E7G   RELATED DB: PDB                                   
REMARK 900  HUMAN SERUM ALBUMIN COMPLEXED WITH MYRISTIC ACID                    
REMARK 900 RELATED ID: 1E7I   RELATED DB: PDB                                   
REMARK 900  HUMAN SERUM ALBUMIN COMPLEXED WITH OCTADECANOIC ACID                
REMARK 900 RELATED ID: 1UOR   RELATED DB: PDB                                   
REMARK 900  X-RAY STUDY OF RECOMBINANT HUMAN SERUM ALBUMIN. PHASES              
REMARK 900  DETERMINED BY MOLECULAR REPLACEMENT METHOD, USING LOW               
REMARK 900  RESOLUTION STRUCTURE MODEL OF TETRAGONAL FORM OF HUMAN              
REMARK 900  SERUM ALBUMIN                                                       
REMARK 999                                                                      
REMARK 999 SEQUENCE                                                             
REMARK 999 1BJ5       SWS     P02768       1 -    26 NOT IN ATOMS LIST          
REMARK 999 1BJ5       SWS     P02768     609 -   609 NOT IN ATOMS LIST          
DBREF  1E7H A    1   585  UNP    P02768   ALBU_HUMAN      25    609             
SEQRES   1 A  585  ASP ALA HIS LYS SER GLU VAL ALA HIS ARG PHE LYS ASP          
SEQRES   2 A  585  LEU GLY GLU GLU ASN PHE LYS ALA LEU VAL LEU ILE ALA          
SEQRES   3 A  585  PHE ALA GLN TYR LEU GLN GLN CYS PRO PHE GLU ASP HIS          
SEQRES   4 A  585  VAL LYS LEU VAL ASN GLU VAL THR GLU PHE ALA LYS THR          
SEQRES   5 A  585  CYS VAL ALA ASP GLU SER ALA GLU ASN CYS ASP LYS SER          
SEQRES   6 A  585  LEU HIS THR LEU PHE GLY ASP LYS LEU CYS THR VAL ALA          
SEQRES   7 A  585  THR LEU ARG GLU THR TYR GLY GLU MET ALA ASP CYS CYS          
SEQRES   8 A  585  ALA LYS GLN GLU PRO GLU ARG ASN GLU CYS PHE LEU GLN          
SEQRES   9 A  585  HIS LYS ASP ASP ASN PRO ASN LEU PRO ARG LEU VAL ARG          
SEQRES  10 A  585  PRO GLU VAL ASP VAL MET CYS THR ALA PHE HIS ASP ASN          
SEQRES  11 A  585  GLU GLU THR PHE LEU LYS LYS TYR LEU TYR GLU ILE ALA          
SEQRES  12 A  585  ARG ARG HIS PRO TYR PHE TYR ALA PRO GLU LEU LEU PHE          
SEQRES  13 A  585  PHE ALA LYS ARG TYR LYS ALA ALA PHE THR GLU CYS CYS          
SEQRES  14 A  585  GLN ALA ALA ASP LYS ALA ALA CYS LEU LEU PRO LYS LEU          
SEQRES  15 A  585  ASP GLU LEU ARG ASP GLU GLY LYS ALA SER SER ALA LYS          
SEQRES  16 A  585  GLN ARG LEU LYS CYS ALA SER LEU GLN LYS PHE GLY GLU          
SEQRES  17 A  585  ARG ALA PHE LYS ALA TRP ALA VAL ALA ARG LEU SER GLN          
SEQRES  18 A  585  ARG PHE PRO LYS ALA GLU PHE ALA GLU VAL SER LYS LEU          
SEQRES  19 A  585  VAL THR ASP LEU THR LYS VAL HIS THR GLU CYS CYS HIS          
SEQRES  20 A  585  GLY ASP LEU LEU GLU CYS ALA ASP ASP ARG ALA ASP LEU          
SEQRES  21 A  585  ALA LYS TYR ILE CYS GLU ASN GLN ASP SER ILE SER SER          
SEQRES  22 A  585  LYS LEU LYS GLU CYS CYS GLU LYS PRO LEU LEU GLU LYS          
SEQRES  23 A  585  SER HIS CYS ILE ALA GLU VAL GLU ASN ASP GLU MET PRO          
SEQRES  24 A  585  ALA ASP LEU PRO SER LEU ALA ALA ASP PHE VAL GLU SER          
SEQRES  25 A  585  LYS ASP VAL CYS LYS ASN TYR ALA GLU ALA LYS ASP VAL          
SEQRES  26 A  585  PHE LEU GLY MET PHE LEU TYR GLU TYR ALA ARG ARG HIS          
SEQRES  27 A  585  PRO ASP TYR SER VAL VAL LEU LEU LEU ARG LEU ALA LYS          
SEQRES  28 A  585  THR TYR GLU THR THR LEU GLU LYS CYS CYS ALA ALA ALA          
SEQRES  29 A  585  ASP PRO HIS GLU CYS TYR ALA LYS VAL PHE ASP GLU PHE          
SEQRES  30 A  585  LYS PRO LEU VAL GLU GLU PRO GLN ASN LEU ILE LYS GLN          
SEQRES  31 A  585  ASN CYS GLU LEU PHE GLU GLN LEU GLY GLU TYR LYS PHE          
SEQRES  32 A  585  GLN ASN ALA LEU LEU VAL ARG TYR THR LYS LYS VAL PRO          
SEQRES  33 A  585  GLN VAL SER THR PRO THR LEU VAL GLU VAL SER ARG ASN          
SEQRES  34 A  585  LEU GLY LYS VAL GLY SER LYS CYS CYS LYS HIS PRO GLU          
SEQRES  35 A  585  ALA LYS ARG MET PRO CYS ALA GLU ASP TYR LEU SER VAL          
SEQRES  36 A  585  VAL LEU ASN GLN LEU CYS VAL LEU HIS GLU LYS THR PRO          
SEQRES  37 A  585  VAL SER ASP ARG VAL THR LYS CYS CYS THR GLU SER LEU          
SEQRES  38 A  585  VAL ASN ARG ARG PRO CYS PHE SER ALA LEU GLU VAL ASP          
SEQRES  39 A  585  GLU THR TYR VAL PRO LYS GLU PHE ASN ALA GLU THR PHE          
SEQRES  40 A  585  THR PHE HIS ALA ASP ILE CYS THR LEU SER GLU LYS GLU          
SEQRES  41 A  585  ARG GLN ILE LYS LYS GLN THR ALA LEU VAL GLU LEU VAL          
SEQRES  42 A  585  LYS HIS LYS PRO LYS ALA THR LYS GLU GLN LEU LYS ALA          
SEQRES  43 A  585  VAL MET ASP ASP PHE ALA ALA PHE VAL GLU LYS CYS CYS          
SEQRES  44 A  585  LYS ALA ASP ASP LYS GLU THR CYS PHE ALA GLU GLU GLY          
SEQRES  45 A  585  LYS LYS LEU VAL ALA ALA SER GLN ALA ALA LEU GLY LEU          
HET    PLM  A1001      13                                                       
HET    PLM  A1002      18                                                       
HET    PLM  A1003      17                                                       
HET    PLM  A1004      18                                                       
HET    PLM  A1005      17                                                       
HET    PLM  A1006      18                                                       
HET    PLM  A1007      10                                                       
HETNAM     PLM PALMITIC ACID                                                    
FORMUL   2  PLM    7(C16 H32 O2)                                                
FORMUL   9  HOH   *29(H2 O1)                                                    
HELIX    1   1 SER A    5  GLY A   15  1                                  11    
HELIX    2   2 GLY A   15  LEU A   31  1                                  17    
HELIX    3   3 PRO A   35  ASP A   56  1                                  22    
HELIX    4   4 SER A   65  CYS A   75  1                                  11    
HELIX    5   5 THR A   79  GLY A   85  1                                   7    
HELIX    6   6 GLU A   86  LYS A   93  5                                   8    
HELIX    7   7 GLN A   94  HIS A  105  1                                  12    
HELIX    8   8 GLU A  119  ASN A  130  1                                  12    
HELIX    9   9 ASN A  130  HIS A  146  1                                  17    
HELIX   10  10 TYR A  150  CYS A  169  1                                  20    
HELIX   11  11 ASP A  173  GLY A  207  1                                  35    
HELIX   12  12 PHE A  206  PHE A  223  1                                  18    
HELIX   13  13 GLU A  227  HIS A  247  1                                  21    
HELIX   14  14 ASP A  249  ASN A  267  1                                  19    
HELIX   15  15 GLN A  268  ILE A  271  5                                   4    
HELIX   16  16 LEU A  275  LYS A  281  1                                   7    
HELIX   17  17 PRO A  282  LEU A  284  5                                   3    
HELIX   18  18 GLU A  285  VAL A  293  1                                   9    
HELIX   19  19 SER A  304  VAL A  310  1                                   7    
HELIX   20  20 ASP A  314  ALA A  322  1                                   9    
HELIX   21  21 ALA A  322  ARG A  337  1                                  16    
HELIX   22  22 SER A  342  CYS A  361  1                                  20    
HELIX   23  23 ASP A  365  TYR A  370  1                                   6    
HELIX   24  24 VAL A  373  LEU A  398  1                                  26    
HELIX   25  25 GLY A  399  VAL A  415  1                                  17    
HELIX   26  26 SER A  419  CYS A  438  1                                  20    
HELIX   27  27 PRO A  441  THR A  467  1                                  27    
HELIX   28  28 SER A  470  THR A  478  1                                   9    
HELIX   29  29 ASN A  483  LEU A  491  1                                   9    
HELIX   30  30 ALA A  511  LEU A  516  1                                   6    
HELIX   31  31 SER A  517  LYS A  536  1                                  20    
HELIX   32  32 THR A  540  LYS A  560  1                                  21    
HELIX   33  33 ASP A  563  LEU A  583  1                                  21    
SSBOND   1 CYS A   53    CYS A   62                          1555   1555  2.03  
SSBOND   2 CYS A   75    CYS A   91                          1555   1555  2.03  
SSBOND   3 CYS A   90    CYS A  101                          1555   1555  2.03  
SSBOND   4 CYS A  124    CYS A  169                          1555   1555  2.03  
SSBOND   5 CYS A  168    CYS A  177                          1555   1555  2.03  
SSBOND   6 CYS A  200    CYS A  246                          1555   1555  2.03  
SSBOND   7 CYS A  245    CYS A  253                          1555   1555  2.02  
SSBOND   8 CYS A  265    CYS A  279                          1555   1555  2.03  
SSBOND   9 CYS A  278    CYS A  289                          1555   1555  2.03  
SSBOND  10 CYS A  316    CYS A  361                          1555   1555  2.03  
SSBOND  11 CYS A  360    CYS A  369                          1555   1555  2.01  
SSBOND  12 CYS A  392    CYS A  438                          1555   1555  2.03  
SSBOND  13 CYS A  437    CYS A  448                          1555   1555  2.03  
SSBOND  14 CYS A  461    CYS A  477                          1555   1555  2.03  
SSBOND  15 CYS A  476    CYS A  487                          1555   1555  2.03  
SSBOND  16 CYS A  514    CYS A  559                          1555   1555  2.05  
SSBOND  17 CYS A  558    CYS A  567                          1555   1555  2.03  
SITE     1 AC1  5 ARG A 117  LEU A 135  TYR A 138  TYR A 161                    
SITE     2 AC1  5 HOH A2005                                                     
SITE     1 AC2  8 VAL A  46  LEU A  69  TYR A 150  LEU A 251                    
SITE     2 AC2  8 ALA A 254  ARG A 257  LEU A 283  SER A 287                    
SITE     1 AC3  8 SER A 342  VAL A 344  ARG A 348  ASN A 391                    
SITE     2 AC3  8 GLY A 434  LEU A 453  ARG A 485  PLM A1004                    
SITE     1 AC4 11 LEU A 387  TYR A 411  LEU A 457  LEU A 460                    
SITE     2 AC4 11 LEU A 463  HIS A 464  SER A 489  PLM A1003                    
SITE     3 AC4 11 HOH A2016  HOH A2028  HOH A2029                               
SITE     1 AC5  8 TYR A 401  PHE A 502  PHE A 507  LYS A 525                    
SITE     2 AC5  8 ALA A 528  HIS A 535  MET A 548  GLN A 580                    
SITE     1 AC6  3 ARG A 209  ALA A 210  LYS A 351                               
SITE     1 AC7  2 ARG A 218  ARG A 222                                          
CRYST1  190.090   38.750   95.870  90.00 104.96  90.00 C 1 2 1       4          
ORIGX1      1.000000  0.000000  0.000000        0.00000                         
ORIGX2      0.000000  1.000000  0.000000        0.00000                         
ORIGX3      0.000000  0.000000  1.000000        0.00000                         
SCALE1      0.005261  0.000000  0.001406        0.00000                         
SCALE2      0.000000  0.025806  0.000000        0.00000                         
SCALE3      0.000000  0.000000  0.010797        0.00000                         
ATOM      1  N   HIS A   3      61.491  17.049   8.992  1.00 78.72           N  
ATOM      2  CA  HIS A   3      60.938  16.206  10.046  1.00 77.88           C  
ATOM      3  C   HIS A   3      61.847  15.004  10.343  1.00 77.13           C  
ATOM      4  O   HIS A   3      61.510  13.860  10.021  1.00 76.46           O  
ATOM      5  CB  HIS A   3      59.533  15.718   9.648  1.00 78.08           C  
ATOM      6  CG  HIS A   3      58.437  16.235  10.530  1.00 74.59           C  
ATOM      7  N   LYS A   4      63.001  15.269  10.952  1.00 75.30           N  
ATOM      8  CA  LYS A   4      63.937  14.203  11.299  1.00 73.08           C  
ATOM      9  C   LYS A   4      63.377  13.420  12.484  1.00 71.31           C  
ATOM     10  O   LYS A   4      63.511  12.195  12.551  1.00 71.49           O  
ATOM     11  CB  LYS A   4      65.306  14.787  11.663  1.00 72.74           C  
ATOM     12  N   SER A   5      62.747  14.138  13.414  1.00 67.83           N  
ATOM     13  CA  SER A   5      62.155  13.525  14.603  1.00 61.69           C  
ATOM     14  C   SER A   5      60.646  13.678  14.575  1.00 58.72           C  
ATOM     15  O   SER A   5      60.128  14.782  14.396  1.00 56.23           O  
ATOM     16  CB  SER A   5      62.699  14.178  15.874  1.00 60.40           C  
ATOM     17  OG  SER A   5      62.709  13.257  16.948  1.00 57.23           O  
ATOM     18  N   GLU A   6      59.945  12.563  14.752  1.00 56.37           N  
ATOM     19  CA  GLU A   6      58.489  12.573  14.744  1.00 55.00           C  
ATOM     20  C   GLU A   6      57.906  13.160  16.035  1.00 54.57           C  
ATOM     21  O   GLU A   6      56.965  13.954  15.981  1.00 55.71           O  
ATOM     22  CB  GLU A   6      57.951  11.156  14.521  1.00 53.72           C  
ATOM     23  N   VAL A   7      58.460  12.777  17.188  1.00 51.05           N  
ATOM     24  CA  VAL A   7      57.972  13.290  18.468  1.00 48.32           C  
ATOM     25  C   VAL A   7      58.244  14.778  18.595  1.00 46.49           C  
ATOM     26  O   VAL A   7      57.372  15.554  19.000  1.00 45.07           O  
ATOM     27  CB  VAL A   7      58.636  12.594  19.683  1.00 48.39           C  
ATOM     28  CG1 VAL A   7      57.938  11.279  19.967  1.00 49.76           C  
ATOM     29  CG2 VAL A   7      60.123  12.397  19.437  1.00 46.29           C  
ATOM     30  N   ALA A   8      59.464  15.172  18.254  1.00 44.37           N  
ATOM     31  CA  ALA A   8      59.844  16.570  18.336  1.00 44.22           C  
ATOM     32  C   ALA A   8      58.867  17.407  17.537  1.00 44.72           C  
ATOM     33  O   ALA A   8      58.448  18.479  17.978  1.00 42.95           O  
ATOM     34  CB  ALA A   8      61.250  16.759  17.807  1.00 45.00           C  
ATOM     35  N   HIS A   9      58.495  16.898  16.364  1.00 47.37           N  
ATOM     36  CA  HIS A   9      57.574  17.594  15.472  1.00 48.75           C  
ATOM     37  C   HIS A   9      56.175  17.697  16.064  1.00 47.67           C  
ATOM     38  O   HIS A   9      55.533  18.745  15.981  1.00 48.53           O  
ATOM     39  CB  HIS A   9      57.513  16.888  14.115  1.00 52.97           C  
ATOM     40  CG  HIS A   9      56.633  17.574  13.130  1.00 61.21           C  
ATOM     41  ND1 HIS A   9      55.676  16.906  12.378  1.00 63.77           N  
ATOM     42  CD2 HIS A   9      56.530  18.884  12.772  1.00 63.56           C  
ATOM     43  CE1 HIS A   9      55.038  17.776  11.616  1.00 64.59           C  
ATOM     44  NE2 HIS A   9      55.531  18.969  11.832  1.00 65.16           N  
ATOM     45  N   ARG A  10      55.699  16.612  16.664  1.00 46.08           N  
ATOM     46  CA  ARG A  10      54.375  16.616  17.265  1.00 44.38           C  
ATOM     47  C   ARG A  10      54.400  17.428  18.559  1.00 43.73           C  
ATOM     48  O   ARG A  10      53.441  18.137  18.876  1.00 43.60           O  
ATOM     49  CB  ARG A  10      53.914  15.184  17.538  1.00 47.37           C  
ATOM     50  CG  ARG A  10      53.273  14.504  16.340  1.00 52.47           C  
ATOM     51  CD  ARG A  10      51.992  15.214  15.938  1.00 61.91           C  
ATOM     52  NE  ARG A  10      51.512  14.803  14.622  1.00 70.36           N  
ATOM     53  CZ  ARG A  10      50.991  15.638  13.726  1.00 76.04           C  
ATOM     54  NH1 ARG A  10      50.881  16.932  14.004  1.00 77.97           N  
ATOM     55  NH2 ARG A  10      50.572  15.180  12.552  1.00 79.16           N  
ATOM     56  N   PHE A  11      55.498  17.330  19.302  1.00 41.68           N  
ATOM     57  CA  PHE A  11      55.626  18.089  20.535  1.00 42.71           C  
ATOM     58  C   PHE A  11      55.467  19.571  20.218  1.00 44.72           C  
ATOM     59  O   PHE A  11      54.807  20.315  20.954  1.00 45.97           O  
ATOM     60  CB  PHE A  11      56.989  17.860  21.176  1.00 39.80           C  
ATOM     61  CG  PHE A  11      57.092  18.410  22.566  1.00 42.64           C  
ATOM     62  CD1 PHE A  11      56.684  17.650  23.661  1.00 42.75           C  
ATOM     63  CD2 PHE A  11      57.573  19.698  22.787  1.00 43.72           C  
ATOM     64  CE1 PHE A  11      56.753  18.166  24.958  1.00 42.08           C  
ATOM     65  CE2 PHE A  11      57.645  20.223  24.082  1.00 43.88           C  
ATOM     66  CZ  PHE A  11      57.234  19.455  25.168  1.00 42.06           C  
ATOM     67  N   LYS A  12      56.071  19.987  19.108  1.00 44.93           N  
ATOM     68  CA  LYS A  12      56.023  21.375  18.676  1.00 44.58           C  
ATOM     69  C   LYS A  12      54.628  21.820  18.267  1.00 44.48           C  
ATOM     70  O   LYS A  12      54.153  22.845  18.740  1.00 46.41           O  
ATOM     71  CB  LYS A  12      56.996  21.601  17.519  1.00 47.76           C  
ATOM     72  CG  LYS A  12      58.470  21.470  17.890  1.00 50.59           C  
ATOM     73  CD  LYS A  12      59.371  21.853  16.719  1.00 55.75           C  
ATOM     74  CE  LYS A  12      60.657  21.032  16.701  1.00 60.98           C  
ATOM     75  NZ  LYS A  12      61.098  20.647  15.317  1.00 64.07           N  
ATOM     76  N   ASP A  13      53.963  21.065  17.395  1.00 44.77           N  
ATOM     77  CA  ASP A  13      52.620  21.461  16.966  1.00 47.54           C  
ATOM     78  C   ASP A  13      51.666  21.464  18.145  1.00 47.92           C  
ATOM     79  O   ASP A  13      50.863  22.386  18.307  1.00 50.76           O  
ATOM     80  CB  ASP A  13      52.042  20.505  15.915  1.00 50.26           C  
ATOM     81  CG  ASP A  13      52.928  20.349  14.698  1.00 55.40           C  
ATOM     82  OD1 ASP A  13      53.650  21.305  14.347  1.00 59.14           O  
ATOM     83  OD2 ASP A  13      52.898  19.258  14.084  1.00 57.10           O  
ATOM     84  N   LEU A  14      51.764  20.417  18.960  1.00 44.91           N  
ATOM     85  CA  LEU A  14      50.894  20.225  20.110  1.00 39.84           C  
ATOM     86  C   LEU A  14      51.148  21.152  21.290  1.00 37.78           C  
ATOM     87  O   LEU A  14      50.209  21.699  21.866  1.00 36.29           O  
ATOM     88  CB  LEU A  14      50.994  18.770  20.577  1.00 37.79           C  
ATOM     89  CG  LEU A  14      49.888  17.780  20.199  1.00 35.49           C  
ATOM     90  CD1 LEU A  14      49.043  18.301  19.054  1.00 31.66           C  
ATOM     91  CD2 LEU A  14      50.534  16.465  19.830  1.00 35.26           C  
ATOM     92  N   GLY A  15      52.412  21.335  21.645  1.00 35.48           N  
ATOM     93  CA  GLY A  15      52.721  22.169  22.788  1.00 32.31           C  
ATOM     94  C   GLY A  15      52.818  21.226  23.970  1.00 32.34           C  
ATOM     95  O   GLY A  15      52.160  20.189  23.987  1.00 30.07           O  
ATOM     96  N   GLU A  16      53.634  21.577  24.955  1.00 34.03           N  
ATOM     97  CA  GLU A  16      53.834  20.740  26.132  1.00 35.66           C  
ATOM     98  C   GLU A  16      52.571  20.301  26.866  1.00 37.24           C  
ATOM     99  O   GLU A  16      52.382  19.112  27.108  1.00 37.00           O  
ATOM    100  CB  GLU A  16      54.747  21.451  27.115  1.00 36.90           C  
ATOM    101  CG  GLU A  16      55.026  20.648  28.346  1.00 39.31           C  
ATOM    102  CD  GLU A  16      56.229  21.161  29.077  1.00 41.93           C  
ATOM    103  OE1 GLU A  16      56.204  22.333  29.493  1.00 48.97           O  
ATOM    104  OE2 GLU A  16      57.201  20.400  29.232  1.00 43.41           O  
ATOM    105  N   GLU A  17      51.716  21.256  27.221  1.00 38.60           N  
ATOM    106  CA  GLU A  17      50.481  20.961  27.948  1.00 40.83           C  
ATOM    107  C   GLU A  17      49.581  19.920  27.285  1.00 40.00           C  
ATOM    108  O   GLU A  17      49.146  18.958  27.927  1.00 39.79           O  
ATOM    109  CB  GLU A  17      49.682  22.249  28.175  1.00 44.78           C  
ATOM    110  CG  GLU A  17      50.210  23.112  29.316  1.00 52.05           C  
ATOM    111  CD  GLU A  17      50.701  22.295  30.508  1.00 56.87           C  
ATOM    112  OE1 GLU A  17      49.918  21.471  31.038  1.00 58.25           O  
ATOM    113  OE2 GLU A  17      51.873  22.480  30.914  1.00 57.85           O  
ATOM    114  N   ASN A  18      49.287  20.116  26.007  1.00 38.64           N  
ATOM    115  CA  ASN A  18      48.443  19.179  25.283  1.00 36.24           C  
ATOM    116  C   ASN A  18      49.144  17.836  25.090  1.00 35.19           C  
ATOM    117  O   ASN A  18      48.516  16.782  25.194  1.00 33.56           O  
ATOM    118  CB  ASN A  18      48.073  19.760  23.927  1.00 39.83           C  
ATOM    119  CG  ASN A  18      47.141  20.939  24.043  1.00 42.51           C  
ATOM    120  OD1 ASN A  18      46.218  20.928  24.856  1.00 42.24           O  
ATOM    121  ND2 ASN A  18      47.374  21.968  23.230  1.00 43.21           N  
ATOM    122  N   PHE A  19      50.444  17.880  24.807  1.00 31.66           N  
ATOM    123  CA  PHE A  19      51.228  16.671  24.592  1.00 31.34           C  
ATOM    124  C   PHE A  19      51.140  15.734  25.798  1.00 32.60           C  
ATOM    125  O   PHE A  19      50.749  14.568  25.672  1.00 31.43           O  
ATOM    126  CB  PHE A  19      52.690  17.037  24.333  1.00 29.89           C  
ATOM    127  CG  PHE A  19      53.566  15.858  24.006  1.00 29.24           C  
ATOM    128  CD1 PHE A  19      53.543  15.285  22.738  1.00 28.60           C  
ATOM    129  CD2 PHE A  19      54.420  15.328  24.963  1.00 29.00           C  
ATOM    130  CE1 PHE A  19      54.362  14.198  22.426  1.00 28.15           C  
ATOM    131  CE2 PHE A  19      55.243  14.241  24.661  1.00 31.77           C  
ATOM    132  CZ  PHE A  19      55.212  13.675  23.387  1.00 29.07           C  
ATOM    133  N   LYS A  20      51.517  16.258  26.960  1.00 32.30           N  
ATOM    134  CA  LYS A  20      51.483  15.505  28.208  1.00 31.51           C  
ATOM    135  C   LYS A  20      50.090  14.923  28.444  1.00 29.45           C  
ATOM    136  O   LYS A  20      49.954  13.761  28.806  1.00 31.14           O  
ATOM    137  CB  LYS A  20      51.830  16.418  29.379  1.00 33.91           C  
ATOM    138  CG  LYS A  20      53.290  16.756  29.553  1.00 34.70           C  
ATOM    139  CD  LYS A  20      53.460  17.525  30.861  1.00 40.20           C  
ATOM    140  CE  LYS A  20      54.882  17.469  31.382  1.00 45.57           C  
ATOM    141  NZ  LYS A  20      55.128  18.581  32.346  1.00 50.64           N  
ATOM    142  N   ALA A  21      49.061  15.737  28.240  1.00 25.99           N  
ATOM    143  CA  ALA A  21      47.695  15.292  28.446  1.00 27.08           C  
ATOM    144  C   ALA A  21      47.355  14.123  27.538  1.00 29.22           C  
ATOM    145  O   ALA A  21      46.764  13.138  27.979  1.00 34.61           O  
ATOM    146  CB  ALA A  21      46.726  16.438  28.205  1.00 25.98           C  
ATOM    147  N   LEU A  22      47.735  14.228  26.269  1.00 29.70           N  
ATOM    148  CA  LEU A  22      47.458  13.175  25.297  1.00 25.26           C  
ATOM    149  C   LEU A  22      48.270  11.918  25.558  1.00 21.79           C  
ATOM    150  O   LEU A  22      47.774  10.808  25.383  1.00 21.13           O  
ATOM    151  CB  LEU A  22      47.739  13.678  23.886  1.00 25.81           C  
ATOM    152  CG  LEU A  22      46.681  14.643  23.366  1.00 26.49           C  
ATOM    153  CD1 LEU A  22      47.170  15.295  22.092  1.00 28.76           C  
ATOM    154  CD2 LEU A  22      45.399  13.891  23.119  1.00 28.33           C  
ATOM    155  N   VAL A  23      49.522  12.071  25.961  1.00 18.45           N  
ATOM    156  CA  VAL A  23      50.315  10.882  26.235  1.00 23.66           C  
ATOM    157  C   VAL A  23      49.641  10.151  27.396  1.00 26.80           C  
ATOM    158  O   VAL A  23      49.583   8.927  27.423  1.00 27.75           O  
ATOM    159  CB  VAL A  23      51.783  11.239  26.602  1.00 24.29           C  
ATOM    160  CG1 VAL A  23      52.508  10.017  27.156  1.00 22.34           C  
ATOM    161  CG2 VAL A  23      52.520  11.750  25.361  1.00 25.92           C  
ATOM    162  N   LEU A  24      49.107  10.913  28.345  1.00 29.59           N  
ATOM    163  CA  LEU A  24      48.434  10.320  29.489  1.00 30.98           C  
ATOM    164  C   LEU A  24      47.224   9.518  29.024  1.00 30.00           C  
ATOM    165  O   LEU A  24      47.044   8.368  29.416  1.00 28.78           O  
ATOM    166  CB  LEU A  24      47.981  11.406  30.479  1.00 33.91           C  
ATOM    167  CG  LEU A  24      47.026  10.951  31.596  1.00 34.34           C  
ATOM    168  CD1 LEU A  24      47.810  10.277  32.718  1.00 32.35           C  
ATOM    169  CD2 LEU A  24      46.254  12.145  32.118  1.00 33.87           C  
ATOM    170  N   ILE A  25      46.393  10.128  28.191  1.00 28.71           N  
ATOM    171  CA  ILE A  25      45.203   9.448  27.700  1.00 28.50           C  
ATOM    172  C   ILE A  25      45.568   8.192  26.905  1.00 30.30           C  
ATOM    173  O   ILE A  25      45.033   7.113  27.153  1.00 33.14           O  
ATOM    174  CB  ILE A  25      44.348  10.394  26.820  1.00 26.10           C  
ATOM    175  CG1 ILE A  25      43.975  11.653  27.615  1.00 26.34           C  
ATOM    176  CG2 ILE A  25      43.090   9.686  26.365  1.00 26.17           C  
ATOM    177  CD1 ILE A  25      43.005  12.593  26.907  1.00 21.30           C  
ATOM    178  N   ALA A  26      46.491   8.335  25.959  1.00 31.50           N  
ATOM    179  CA  ALA A  26      46.920   7.219  25.124  1.00 28.69           C  
ATOM    180  C   ALA A  26      47.338   6.027  25.964  1.00 27.15           C  
ATOM    181  O   ALA A  26      46.907   4.904  25.719  1.00 25.46           O  
ATOM    182  CB  ALA A  26      48.075   7.650  24.234  1.00 26.95           C  
ATOM    183  N   PHE A  27      48.191   6.275  26.948  1.00 29.99           N  
ATOM    184  CA  PHE A  27      48.668   5.211  27.826  1.00 35.55           C  
ATOM    185  C   PHE A  27      47.537   4.626  28.689  1.00 36.62           C  
ATOM    186  O   PHE A  27      47.504   3.420  28.940  1.00 37.17           O  
ATOM    187  CB  PHE A  27      49.791   5.738  28.722  1.00 37.06           C  
ATOM    188  CG  PHE A  27      51.154   5.684  28.084  1.00 43.30           C  
ATOM    189  CD1 PHE A  27      51.595   4.530  27.444  1.00 46.65           C  
ATOM    190  CD2 PHE A  27      52.000   6.790  28.120  1.00 46.62           C  
ATOM    191  CE1 PHE A  27      52.860   4.478  26.848  1.00 47.75           C  
ATOM    192  CE2 PHE A  27      53.267   6.746  27.525  1.00 47.50           C  
ATOM    193  CZ  PHE A  27      53.694   5.588  26.889  1.00 47.37           C  
ATOM    194  N   ALA A  28      46.612   5.481  29.126  1.00 35.85           N  
ATOM    195  CA  ALA A  28      45.484   5.062  29.953  1.00 35.28           C  
ATOM    196  C   ALA A  28      44.518   4.160  29.182  1.00 35.95           C  
ATOM    197  O   ALA A  28      43.987   3.195  29.736  1.00 37.85           O  
ATOM    198  CB  ALA A  28      44.735   6.292  30.493  1.00 31.83           C  
ATOM    199  N   GLN A  29      44.289   4.471  27.908  1.00 35.02           N  
ATOM    200  CA  GLN A  29      43.376   3.684  27.084  1.00 34.93           C  
ATOM    201  C   GLN A  29      43.924   2.297  26.773  1.00 36.75           C  
ATOM    202  O   GLN A  29      43.169   1.402  26.396  1.00 36.87           O  
ATOM    203  CB  GLN A  29      43.064   4.424  25.779  1.00 32.96           C  
ATOM    204  CG  GLN A  29      42.238   5.691  25.986  1.00 32.62           C  
ATOM    205  CD  GLN A  29      41.919   6.421  24.692  1.00 30.93           C  
ATOM    206  OE1 GLN A  29      42.720   6.440  23.764  1.00 34.34           O  
ATOM    207  NE2 GLN A  29      40.741   7.030  24.630  1.00 27.15           N  
ATOM    208  N   TYR A  30      45.232   2.120  26.944  1.00 39.37           N  
ATOM    209  CA  TYR A  30      45.877   0.835  26.680  1.00 44.86           C  
ATOM    210  C   TYR A  30      46.053   0.018  27.952  1.00 47.36           C  
ATOM    211  O   TYR A  30      45.430  -1.035  28.123  1.00 51.45           O  
ATOM    212  CB  TYR A  30      47.236   1.054  26.022  1.00 45.91           C  
ATOM    213  CG  TYR A  30      47.143   1.245  24.533  1.00 48.52           C  
ATOM    214  CD1 TYR A  30      46.931   2.507  23.989  1.00 48.28           C  
ATOM    215  CD2 TYR A  30      47.271   0.160  23.660  1.00 51.80           C  
ATOM    216  CE1 TYR A  30      46.850   2.691  22.608  1.00 53.79           C  
ATOM    217  CE2 TYR A  30      47.192   0.329  22.274  1.00 52.34           C  
ATOM    218  CZ  TYR A  30      46.983   1.598  21.755  1.00 54.17           C  
ATOM    219  OH  TYR A  30      46.911   1.783  20.392  1.00 55.72           O  
ATOM    220  N   LEU A  31      46.915   0.498  28.839  1.00 47.05           N  
ATOM    221  CA  LEU A  31      47.155  -0.179  30.104  1.00 46.75           C  
ATOM    222  C   LEU A  31      46.137   0.378  31.092  1.00 45.57           C  
ATOM    223  O   LEU A  31      46.461   1.167  31.977  1.00 44.26           O  
ATOM    224  CB  LEU A  31      48.590   0.089  30.568  1.00 48.64           C  
ATOM    225  CG  LEU A  31      49.643  -0.338  29.538  1.00 50.60           C  
ATOM    226  CD1 LEU A  31      51.029  -0.088  30.093  1.00 51.25           C  
ATOM    227  CD2 LEU A  31      49.461  -1.817  29.182  1.00 51.87           C  
ATOM    228  N   GLN A  32      44.896  -0.058  30.923  1.00 45.09           N  
ATOM    229  CA  GLN A  32      43.785   0.401  31.733  1.00 46.95           C  
ATOM    230  C   GLN A  32      43.728  -0.032  33.193  1.00 49.08           C  
ATOM    231  O   GLN A  32      42.924   0.505  33.957  1.00 49.95           O  
ATOM    232  CB  GLN A  32      42.479   0.014  31.045  1.00 46.94           C  
ATOM    233  CG  GLN A  32      42.561  -0.011  29.526  1.00 46.91           C  
ATOM    234  CD  GLN A  32      41.379  -0.723  28.908  1.00 49.07           C  
ATOM    235  OE1 GLN A  32      40.641  -1.410  29.599  1.00 49.52           O  
ATOM    236  NE2 GLN A  32      41.194  -0.562  27.604  1.00 50.13           N  
ATOM    237  N   GLN A  33      44.564  -0.981  33.600  1.00 51.12           N  
ATOM    238  CA  GLN A  33      44.526  -1.432  34.989  1.00 53.30           C  
ATOM    239  C   GLN A  33      45.746  -1.035  35.806  1.00 52.64           C  
ATOM    240  O   GLN A  33      45.959  -1.548  36.899  1.00 54.83           O  
ATOM    241  CB  GLN A  33      44.327  -2.952  35.047  1.00 57.88           C  
ATOM    242  CG  GLN A  33      43.107  -3.459  34.256  1.00 65.97           C  
ATOM    243  CD  GLN A  33      41.767  -3.207  34.960  1.00 70.17           C  
ATOM    244  OE1 GLN A  33      41.727  -2.849  36.139  1.00 72.75           O  
ATOM    245  NE2 GLN A  33      40.665  -3.397  34.230  1.00 72.00           N  
ATOM    246  N   CYS A  34      46.544  -0.115  35.280  1.00 52.14           N  
ATOM    247  CA  CYS A  34      47.735   0.345  35.985  1.00 49.11           C  
ATOM    248  C   CYS A  34      47.387   1.573  36.824  1.00 47.21           C  
ATOM    249  O   CYS A  34      46.549   2.384  36.432  1.00 45.10           O  
ATOM    250  CB  CYS A  34      48.841   0.685  34.981  1.00 50.52           C  
ATOM    251  SG  CYS A  34      50.145  -0.562  34.871  1.00 53.86           S  
ATOM    252  N   PRO A  35      48.027   1.726  37.993  1.00 47.27           N  
ATOM    253  CA  PRO A  35      47.746   2.878  38.862  1.00 47.52           C  
ATOM    254  C   PRO A  35      48.187   4.230  38.289  1.00 47.86           C  
ATOM    255  O   PRO A  35      49.181   4.328  37.568  1.00 48.68           O  
ATOM    256  CB  PRO A  35      48.475   2.538  40.160  1.00 45.73           C  
ATOM    257  CG  PRO A  35      49.579   1.631  39.735  1.00 46.98           C  
ATOM    258  CD  PRO A  35      49.051   0.837  38.570  1.00 46.54           C  
ATOM    259  N   PHE A  36      47.437   5.270  38.627  1.00 46.56           N  
ATOM    260  CA  PHE A  36      47.722   6.615  38.158  1.00 45.64           C  
ATOM    261  C   PHE A  36      49.182   7.009  38.316  1.00 46.89           C  
ATOM    262  O   PHE A  36      49.838   7.388  37.350  1.00 47.81           O  
ATOM    263  CB  PHE A  36      46.848   7.612  38.908  1.00 44.43           C  
ATOM    264  CG  PHE A  36      47.038   9.032  38.472  1.00 44.80           C  
ATOM    265  CD1 PHE A  36      46.497   9.480  37.269  1.00 44.41           C  
ATOM    266  CD2 PHE A  36      47.744   9.929  39.273  1.00 43.06           C  
ATOM    267  CE1 PHE A  36      46.655  10.799  36.872  1.00 44.94           C  
ATOM    268  CE2 PHE A  36      47.909  11.250  38.889  1.00 41.56           C  
ATOM    269  CZ  PHE A  36      47.363  11.689  37.685  1.00 46.30           C  
ATOM    270  N   GLU A  37      49.690   6.925  39.538  1.00 48.77           N  
ATOM    271  CA  GLU A  37      51.078   7.288  39.812  1.00 51.15           C  
ATOM    272  C   GLU A  37      52.039   6.639  38.823  1.00 50.39           C  
ATOM    273  O   GLU A  37      53.124   7.161  38.579  1.00 50.11           O  
ATOM    274  CB  GLU A  37      51.464   6.891  41.243  1.00 53.53           C  
ATOM    275  CG  GLU A  37      50.501   7.398  42.315  1.00 57.84           C  
ATOM    276  CD  GLU A  37      49.249   6.539  42.436  1.00 59.78           C  
ATOM    277  OE1 GLU A  37      49.375   5.295  42.440  1.00 60.64           O  
ATOM    278  OE2 GLU A  37      48.137   7.110  42.525  1.00 61.12           O  
ATOM    279  N   ASP A  38      51.638   5.502  38.261  1.00 50.60           N  
ATOM    280  CA  ASP A  38      52.471   4.789  37.295  1.00 51.52           C  
ATOM    281  C   ASP A  38      52.463   5.495  35.942  1.00 48.96           C  
ATOM    282  O   ASP A  38      53.513   5.713  35.340  1.00 46.78           O  
ATOM    283  CB  ASP A  38      51.976   3.352  37.121  1.00 54.64           C  
ATOM    284  CG  ASP A  38      52.678   2.381  38.046  1.00 58.63           C  
ATOM    285  OD1 ASP A  38      52.966   2.766  39.201  1.00 60.30           O  
ATOM    286  OD2 ASP A  38      52.941   1.235  37.617  1.00 61.04           O  
ATOM    287  N   HIS A  39      51.271   5.846  35.473  1.00 46.85           N  
ATOM    288  CA  HIS A  39      51.118   6.536  34.200  1.00 46.66           C  
ATOM    289  C   HIS A  39      51.808   7.888  34.235  1.00 45.54           C  
ATOM    290  O   HIS A  39      52.423   8.307  33.253  1.00 46.53           O  
ATOM    291  CB  HIS A  39      49.639   6.729  33.885  1.00 47.97           C  
ATOM    292  CG  HIS A  39      48.954   5.474  33.454  1.00 51.35           C  
ATOM    293  ND1 HIS A  39      49.625   4.428  32.862  1.00 53.49           N  
ATOM    294  CD2 HIS A  39      47.656   5.098  33.521  1.00 54.08           C  
ATOM    295  CE1 HIS A  39      48.770   3.461  32.580  1.00 55.03           C  
ATOM    296  NE2 HIS A  39      47.568   3.843  32.969  1.00 54.83           N  
ATOM    297  N   VAL A  40      51.697   8.573  35.368  1.00 43.52           N  
ATOM    298  CA  VAL A  40      52.326   9.874  35.525  1.00 39.17           C  
ATOM    299  C   VAL A  40      53.833   9.732  35.313  1.00 39.71           C  
ATOM    300  O   VAL A  40      54.473  10.607  34.731  1.00 40.34           O  
ATOM    301  CB  VAL A  40      52.044  10.461  36.926  1.00 34.83           C  
ATOM    302  CG1 VAL A  40      53.017  11.592  37.233  1.00 30.77           C  
ATOM    303  CG2 VAL A  40      50.625  10.967  36.985  1.00 29.52           C  
ATOM    304  N   LYS A  41      54.397   8.621  35.773  1.00 39.42           N  
ATOM    305  CA  LYS A  41      55.828   8.392  35.610  1.00 40.28           C  
ATOM    306  C   LYS A  41      56.163   8.238  34.126  1.00 40.19           C  
ATOM    307  O   LYS A  41      57.155   8.787  33.644  1.00 39.99           O  
ATOM    308  CB  LYS A  41      56.258   7.139  36.382  1.00 38.86           C  
ATOM    309  N   LEU A  42      55.326   7.492  33.410  1.00 39.74           N  
ATOM    310  CA  LEU A  42      55.515   7.262  31.984  1.00 38.82           C  
ATOM    311  C   LEU A  42      55.477   8.593  31.261  1.00 38.29           C  
ATOM    312  O   LEU A  42      56.412   8.951  30.555  1.00 38.78           O  
ATOM    313  CB  LEU A  42      54.406   6.363  31.436  1.00 40.06           C  
ATOM    314  CG  LEU A  42      54.570   4.839  31.513  1.00 43.65           C  
ATOM    315  CD1 LEU A  42      54.285   4.243  30.143  1.00 46.69           C  
ATOM    316  CD2 LEU A  42      55.972   4.466  31.964  1.00 44.48           C  
ATOM    317  N   VAL A  43      54.386   9.326  31.451  1.00 37.13           N  
ATOM    318  CA  VAL A  43      54.217  10.620  30.815  1.00 36.51           C  
ATOM    319  C   VAL A  43      55.439  11.510  30.995  1.00 36.80           C  
ATOM    320  O   VAL A  43      55.892  12.135  30.043  1.00 36.66           O  
ATOM    321  CB  VAL A  43      52.978  11.348  31.368  1.00 35.77           C  
ATOM    322  CG1 VAL A  43      53.011  12.827  30.979  1.00 34.90           C  
ATOM    323  CG2 VAL A  43      51.718  10.682  30.835  1.00 35.39           C  
ATOM    324  N   ASN A  44      55.976  11.564  32.209  1.00 37.74           N  
ATOM    325  CA  ASN A  44      57.145  12.399  32.475  1.00 38.34           C  
ATOM    326  C   ASN A  44      58.378  11.896  31.739  1.00 37.13           C  
ATOM    327  O   ASN A  44      59.244  12.678  31.359  1.00 36.35           O  
ATOM    328  CB  ASN A  44      57.432  12.465  33.980  1.00 41.79           C  
ATOM    329  CG  ASN A  44      56.366  13.242  34.749  1.00 47.39           C  
ATOM    330  OD1 ASN A  44      55.480  13.874  34.159  1.00 49.75           O  
ATOM    331  ND2 ASN A  44      56.444  13.191  36.074  1.00 51.47           N  
ATOM    332  N   GLU A  45      58.453  10.586  31.542  1.00 36.94           N  
ATOM    333  CA  GLU A  45      59.577   9.978  30.841  1.00 39.38           C  
ATOM    334  C   GLU A  45      59.528  10.314  29.348  1.00 38.35           C  
ATOM    335  O   GLU A  45      60.513  10.750  28.755  1.00 40.06           O  
ATOM    336  CB  GLU A  45      59.529   8.469  31.009  1.00 42.72           C  
ATOM    337  CG  GLU A  45      60.647   7.914  31.836  1.00 49.73           C  
ATOM    338  CD  GLU A  45      60.432   6.460  32.164  1.00 54.85           C  
ATOM    339  OE1 GLU A  45      59.493   5.855  31.597  1.00 57.69           O  
ATOM    340  OE2 GLU A  45      61.202   5.923  32.989  1.00 61.53           O  
ATOM    341  N   VAL A  46      58.368  10.092  28.750  1.00 34.70           N  
ATOM    342  CA  VAL A  46      58.163  10.371  27.347  1.00 33.56           C  
ATOM    343  C   VAL A  46      58.344  11.859  27.067  1.00 34.90           C  
ATOM    344  O   VAL A  46      59.015  12.229  26.111  1.00 36.48           O  
ATOM    345  CB  VAL A  46      56.753   9.959  26.916  1.00 31.11           C  
ATOM    346  CG1 VAL A  46      56.468  10.473  25.522  1.00 31.30           C  
ATOM    347  CG2 VAL A  46      56.611   8.446  26.990  1.00 31.34           C  
ATOM    348  N   THR A  47      57.743  12.702  27.907  1.00 34.75           N  
ATOM    349  CA  THR A  47      57.829  14.151  27.744  1.00 32.65           C  
ATOM    350  C   THR A  47      59.258  14.617  27.901  1.00 34.54           C  
ATOM    351  O   THR A  47      59.670  15.599  27.282  1.00 36.58           O  
ATOM    352  CB  THR A  47      56.976  14.909  28.777  1.00 31.12           C  
ATOM    353  OG1 THR A  47      55.589  14.608  28.580  1.00 32.02           O  
ATOM    354  CG2 THR A  47      57.175  16.402  28.620  1.00 29.11           C  
ATOM    355  N   GLU A  48      60.015  13.920  28.739  1.00 34.47           N  
ATOM    356  CA  GLU A  48      61.405  14.285  28.937  1.00 36.31           C  
ATOM    357  C   GLU A  48      62.142  13.895  27.657  1.00 37.78           C  
ATOM    358  O   GLU A  48      62.959  14.657  27.145  1.00 39.76           O  
ATOM    359  CB  GLU A  48      61.995  13.555  30.150  1.00 35.01           C  
ATOM    360  N   PHE A  49      61.833  12.712  27.136  1.00 37.56           N  
ATOM    361  CA  PHE A  49      62.448  12.236  25.904  1.00 37.95           C  
ATOM    362  C   PHE A  49      62.128  13.203  24.765  1.00 38.18           C  
ATOM    363  O   PHE A  49      63.021  13.668  24.066  1.00 39.38           O  
ATOM    364  CB  PHE A  49      61.920  10.844  25.564  1.00 38.86           C  
ATOM    365  CG  PHE A  49      62.344  10.344  24.216  1.00 40.27           C  
ATOM    366  CD1 PHE A  49      63.621   9.833  24.018  1.00 42.66           C  
ATOM    367  CD2 PHE A  49      61.453  10.351  23.148  1.00 41.27           C  
ATOM    368  CE1 PHE A  49      64.001   9.332  22.773  1.00 42.59           C  
ATOM    369  CE2 PHE A  49      61.820   9.853  21.900  1.00 39.17           C  
ATOM    370  CZ  PHE A  49      63.093   9.343  21.713  1.00 41.43           C  
ATOM    371  N   ALA A  50      60.848  13.513  24.593  1.00 36.01           N  
ATOM    372  CA  ALA A  50      60.411  14.422  23.540  1.00 36.80           C  
ATOM    373  C   ALA A  50      61.159  15.754  23.544  1.00 38.17           C  
ATOM    374  O   ALA A  50      61.474  16.290  22.487  1.00 38.67           O  
ATOM    375  CB  ALA A  50      58.913  14.671  23.656  1.00 32.64           C  
ATOM    376  N   LYS A  51      61.434  16.292  24.728  1.00 40.36           N  
ATOM    377  CA  LYS A  51      62.145  17.564  24.846  1.00 42.26           C  
ATOM    378  C   LYS A  51      63.586  17.396  24.402  1.00 41.63           C  
ATOM    379  O   LYS A  51      64.189  18.295  23.824  1.00 41.50           O  
ATOM    380  CB  LYS A  51      62.124  18.050  26.289  1.00 43.22           C  
ATOM    381  CG  LYS A  51      60.828  18.695  26.692  1.00 47.37           C  
ATOM    382  CD  LYS A  51      61.111  19.858  27.614  1.00 52.41           C  
ATOM    383  CE  LYS A  51      59.839  20.417  28.204  1.00 52.25           C  
ATOM    384  NZ  LYS A  51      59.976  20.535  29.674  1.00 57.50           N  
ATOM    385  N   THR A  52      64.135  16.231  24.699  1.00 42.28           N  
ATOM    386  CA  THR A  52      65.501  15.897  24.330  1.00 45.27           C  
ATOM    387  C   THR A  52      65.665  16.005  22.809  1.00 45.76           C  
ATOM    388  O   THR A  52      66.668  16.522  22.317  1.00 46.26           O  
ATOM    389  CB  THR A  52      65.819  14.462  24.785  1.00 47.83           C  
ATOM    390  OG1 THR A  52      66.050  14.458  26.199  1.00 54.44           O  
ATOM    391  CG2 THR A  52      67.033  13.919  24.071  1.00 49.08           C  
ATOM    392  N   CYS A  53      64.664  15.509  22.083  1.00 45.49           N  
ATOM    393  CA  CYS A  53      64.641  15.525  20.621  1.00 45.84           C  
ATOM    394  C   CYS A  53      64.333  16.898  20.022  1.00 46.44           C  
ATOM    395  O   CYS A  53      64.691  17.166  18.875  1.00 46.17           O  
ATOM    396  CB  CYS A  53      63.599  14.544  20.091  1.00 45.12           C  
ATOM    397  SG  CYS A  53      63.866  12.821  20.582  1.00 45.54           S  
ATOM    398  N   VAL A  54      63.640  17.748  20.774  1.00 43.88           N  
ATOM    399  CA  VAL A  54      63.315  19.078  20.287  1.00 41.70           C  
ATOM    400  C   VAL A  54      64.601  19.908  20.311  1.00 43.22           C  
ATOM    401  O   VAL A  54      64.745  20.878  19.565  1.00 45.04           O  
ATOM    402  CB  VAL A  54      62.233  19.746  21.174  1.00 40.10           C  
ATOM    403  CG1 VAL A  54      62.138  21.227  20.868  1.00 38.62           C  
ATOM    404  CG2 VAL A  54      60.886  19.092  20.934  1.00 37.36           C  
ATOM    405  N   ALA A  55      65.542  19.495  21.155  1.00 42.39           N  
ATOM    406  CA  ALA A  55      66.820  20.185  21.311  1.00 43.76           C  
ATOM    407  C   ALA A  55      67.885  19.684  20.345  1.00 44.30           C  
ATOM    408  O   ALA A  55      68.842  20.393  20.032  1.00 44.40           O  
ATOM    409  CB  ALA A  55      67.322  20.020  22.745  1.00 41.99           C  
ATOM    410  N   ASP A  56      67.715  18.450  19.892  1.00 45.94           N  
ATOM    411  CA  ASP A  56      68.655  17.819  18.981  1.00 46.06           C  
ATOM    412  C   ASP A  56      67.936  16.671  18.270  1.00 47.29           C  
ATOM    413  O   ASP A  56      67.831  15.564  18.807  1.00 48.39           O  
ATOM    414  CB  ASP A  56      69.849  17.299  19.781  1.00 46.00           C  
ATOM    415  CG  ASP A  56      70.887  16.628  18.915  1.00 48.83           C  
ATOM    416  OD1 ASP A  56      70.597  16.351  17.732  1.00 51.58           O  
ATOM    417  OD2 ASP A  56      71.998  16.375  19.424  1.00 49.88           O  
ATOM    418  N   GLU A  57      67.434  16.945  17.067  1.00 47.95           N  
ATOM    419  CA  GLU A  57      66.712  15.951  16.274  1.00 49.59           C  
ATOM    420  C   GLU A  57      67.551  14.713  15.941  1.00 50.78           C  
ATOM    421  O   GLU A  57      67.031  13.726  15.415  1.00 50.31           O  
ATOM    422  CB  GLU A  57      66.203  16.591  14.976  1.00 47.94           C  
ATOM    423  N   SER A  58      68.842  14.770  16.259  1.00 53.74           N  
ATOM    424  CA  SER A  58      69.768  13.668  15.989  1.00 56.35           C  
ATOM    425  C   SER A  58      69.959  12.725  17.178  1.00 56.83           C  
ATOM    426  O   SER A  58      70.553  11.655  17.029  1.00 59.07           O  
ATOM    427  CB  SER A  58      71.138  14.222  15.584  1.00 57.45           C  
ATOM    428  OG  SER A  58      71.136  14.684  14.247  1.00 61.92           O  
ATOM    429  N   ALA A  59      69.459  13.127  18.346  1.00 55.90           N  
ATOM    430  CA  ALA A  59      69.583  12.341  19.580  1.00 54.86           C  
ATOM    431  C   ALA A  59      69.088  10.897  19.493  1.00 52.62           C  
ATOM    432  O   ALA A  59      68.220  10.565  18.689  1.00 52.79           O  
ATOM    433  CB  ALA A  59      68.871  13.060  20.721  1.00 56.17           C  
ATOM    434  N   GLU A  60      69.642  10.047  20.349  1.00 50.66           N  
ATOM    435  CA  GLU A  60      69.284   8.640  20.370  1.00 50.54           C  
ATOM    436  C   GLU A  60      67.781   8.414  20.324  1.00 50.31           C  
ATOM    437  O   GLU A  60      67.028   9.046  21.059  1.00 51.44           O  
ATOM    438  CB  GLU A  60      69.858   7.968  21.621  1.00 51.70           C  
ATOM    439  N   ASN A  61      67.365   7.516  19.434  1.00 50.39           N  
ATOM    440  CA  ASN A  61      65.969   7.116  19.266  1.00 48.38           C  
ATOM    441  C   ASN A  61      64.982   8.176  18.811  1.00 45.21           C  
ATOM    442  O   ASN A  61      63.796   7.889  18.660  1.00 42.71           O  
ATOM    443  CB  ASN A  61      65.461   6.489  20.567  1.00 53.73           C  
ATOM    444  CG  ASN A  61      66.456   5.512  21.169  1.00 57.79           C  
ATOM    445  OD1 ASN A  61      66.428   4.317  20.862  1.00 61.64           O  
ATOM    446  ND2 ASN A  61      67.347   6.016  22.027  1.00 58.79           N  
ATOM    447  N   CYS A  62      65.459   9.394  18.588  1.00 44.55           N  
ATOM    448  CA  CYS A  62      64.582  10.478  18.154  1.00 43.88           C  
ATOM    449  C   CYS A  62      64.053  10.238  16.747  1.00 44.89           C  
ATOM    450  O   CYS A  62      63.055  10.830  16.332  1.00 43.68           O  
ATOM    451  CB  CYS A  62      65.339  11.802  18.190  1.00 43.78           C  
ATOM    452  SG  CYS A  62      65.715  12.389  19.869  1.00 43.53           S  
ATOM    453  N   ASP A  63      64.735   9.362  16.019  1.00 47.74           N  
ATOM    454  CA  ASP A  63      64.377   9.028  14.646  1.00 51.00           C  
ATOM    455  C   ASP A  63      63.235   8.022  14.553  1.00 52.02           C  
ATOM    456  O   ASP A  63      62.490   8.015  13.577  1.00 52.34           O  
ATOM    457  CB  ASP A  63      65.601   8.469  13.920  1.00 54.80           C  
ATOM    458  CG  ASP A  63      66.263   7.332  14.685  1.00 61.05           C  
ATOM    459  OD1 ASP A  63      66.229   7.347  15.936  1.00 64.22           O  
ATOM    460  OD2 ASP A  63      66.816   6.417  14.036  1.00 65.32           O  
ATOM    461  N   LYS A  64      63.096   7.176  15.569  1.00 52.80           N  
ATOM    462  CA  LYS A  64      62.045   6.163  15.581  1.00 53.21           C  
ATOM    463  C   LYS A  64      60.649   6.753  15.356  1.00 53.42           C  
ATOM    464  O   LYS A  64      60.446   7.965  15.458  1.00 52.86           O  
ATOM    465  CB  LYS A  64      62.084   5.387  16.905  1.00 54.89           C  
ATOM    466  CG  LYS A  64      63.495   5.152  17.466  1.00 55.88           C  
ATOM    467  CD  LYS A  64      63.852   3.669  17.529  1.00 53.42           C  
ATOM    468  N   SER A  65      59.697   5.875  15.042  1.00 54.30           N  
ATOM    469  CA  SER A  65      58.301   6.246  14.788  1.00 53.33           C  
ATOM    470  C   SER A  65      57.515   6.395  16.106  1.00 52.15           C  
ATOM    471  O   SER A  65      58.021   6.050  17.176  1.00 52.05           O  
ATOM    472  CB  SER A  65      57.667   5.163  13.901  1.00 51.95           C  
ATOM    473  OG  SER A  65      56.277   5.030  14.120  1.00 56.74           O  
ATOM    474  N   LEU A  66      56.290   6.916  16.036  1.00 50.85           N  
ATOM    475  CA  LEU A  66      55.470   7.069  17.242  1.00 48.62           C  
ATOM    476  C   LEU A  66      55.006   5.695  17.719  1.00 47.58           C  
ATOM    477  O   LEU A  66      55.009   5.413  18.918  1.00 49.24           O  
ATOM    478  CB  LEU A  66      54.258   7.967  16.972  1.00 46.23           C  
ATOM    479  CG  LEU A  66      54.575   9.458  16.814  1.00 44.63           C  
ATOM    480  CD1 LEU A  66      53.287  10.233  16.654  1.00 45.30           C  
ATOM    481  CD2 LEU A  66      55.363   9.961  18.019  1.00 44.77           C  
ATOM    482  N   HIS A  67      54.619   4.842  16.775  1.00 44.94           N  
ATOM    483  CA  HIS A  67      54.183   3.485  17.095  1.00 44.38           C  
ATOM    484  C   HIS A  67      55.299   2.675  17.759  1.00 44.38           C  
ATOM    485  O   HIS A  67      55.036   1.831  18.618  1.00 46.34           O  
ATOM    486  CB  HIS A  67      53.751   2.752  15.827  1.00 45.15           C  
ATOM    487  CG  HIS A  67      52.382   3.117  15.350  1.00 47.08           C  
ATOM    488  ND1 HIS A  67      52.150   4.155  14.478  1.00 49.09           N  
ATOM    489  CD2 HIS A  67      51.174   2.560  15.608  1.00 47.25           C  
ATOM    490  CE1 HIS A  67      50.858   4.226  14.215  1.00 49.61           C  
ATOM    491  NE2 HIS A  67      50.243   3.270  14.888  1.00 48.86           N  
ATOM    492  N   THR A  68      56.542   2.921  17.352  1.00 43.33           N  
ATOM    493  CA  THR A  68      57.679   2.193  17.906  1.00 42.07           C  
ATOM    494  C   THR A  68      58.022   2.700  19.294  1.00 43.36           C  
ATOM    495  O   THR A  68      58.314   1.917  20.193  1.00 43.30           O  
ATOM    496  CB  THR A  68      58.936   2.323  17.014  1.00 41.09           C  
ATOM    497  OG1 THR A  68      58.651   1.826  15.700  1.00 44.96           O  
ATOM    498  CG2 THR A  68      60.092   1.527  17.608  1.00 36.64           C  
ATOM    499  N   LEU A  69      57.994   4.017  19.463  1.00 44.27           N  
ATOM    500  CA  LEU A  69      58.292   4.616  20.755  1.00 42.17           C  
ATOM    501  C   LEU A  69      57.193   4.239  21.745  1.00 39.80           C  
ATOM    502  O   LEU A  69      57.471   3.733  22.826  1.00 37.45           O  
ATOM    503  CB  LEU A  69      58.388   6.135  20.617  1.00 43.69           C  
ATOM    504  CG  LEU A  69      59.510   6.636  19.702  1.00 46.88           C  
ATOM    505  CD1 LEU A  69      59.458   8.154  19.623  1.00 48.32           C  
ATOM    506  CD2 LEU A  69      60.865   6.166  20.221  1.00 45.13           C  
ATOM    507  N   PHE A  70      55.945   4.479  21.364  1.00 38.51           N  
ATOM    508  CA  PHE A  70      54.821   4.150  22.223  1.00 39.40           C  
ATOM    509  C   PHE A  70      54.898   2.683  22.647  1.00 39.45           C  
ATOM    510  O   PHE A  70      55.024   2.375  23.832  1.00 40.42           O  
ATOM    511  CB  PHE A  70      53.514   4.424  21.485  1.00 43.21           C  
ATOM    512  CG  PHE A  70      52.292   4.010  22.244  1.00 50.89           C  
ATOM    513  CD1 PHE A  70      51.820   4.776  23.311  1.00 53.66           C  
ATOM    514  CD2 PHE A  70      51.604   2.850  21.894  1.00 54.62           C  
ATOM    515  CE1 PHE A  70      50.675   4.389  24.020  1.00 55.37           C  
ATOM    516  CE2 PHE A  70      50.458   2.453  22.594  1.00 55.67           C  
ATOM    517  CZ  PHE A  70      49.995   3.225  23.658  1.00 56.63           C  
ATOM    518  N   GLY A  71      54.832   1.781  21.673  1.00 39.23           N  
ATOM    519  CA  GLY A  71      54.897   0.362  21.966  1.00 37.57           C  
ATOM    520  C   GLY A  71      56.136  -0.029  22.747  1.00 40.97           C  
ATOM    521  O   GLY A  71      56.109  -0.989  23.516  1.00 42.41           O  
ATOM    522  N   ASP A  72      57.228   0.706  22.551  1.00 42.48           N  
ATOM    523  CA  ASP A  72      58.485   0.425  23.252  1.00 45.19           C  
ATOM    524  C   ASP A  72      58.326   0.740  24.742  1.00 46.13           C  
ATOM    525  O   ASP A  72      58.796  -0.013  25.604  1.00 45.35           O  
ATOM    526  CB  ASP A  72      59.626   1.285  22.680  1.00 47.85           C  
ATOM    527  CG  ASP A  72      60.309   0.649  21.472  1.00 48.79           C  
ATOM    528  OD1 ASP A  72      59.926  -0.478  21.087  1.00 49.85           O  
ATOM    529  OD2 ASP A  72      61.231   1.288  20.911  1.00 47.33           O  
ATOM    530  N   LYS A  73      57.669   1.866  25.027  1.00 46.46           N  
ATOM    531  CA  LYS A  73      57.430   2.317  26.394  1.00 46.18           C  
ATOM    532  C   LYS A  73      56.453   1.380  27.095  1.00 46.72           C  
ATOM    533  O   LYS A  73      56.666   0.984  28.242  1.00 45.88           O  
ATOM    534  CB  LYS A  73      56.873   3.744  26.388  1.00 45.12           C  
ATOM    535  CG  LYS A  73      57.898   4.808  26.758  1.00 44.44           C  
ATOM    536  CD  LYS A  73      58.035   4.948  28.261  1.00 42.59           C  
ATOM    537  CE  LYS A  73      59.464   4.714  28.704  1.00 42.68           C  
ATOM    538  NZ  LYS A  73      60.181   5.999  28.892  1.00 45.12           N  
ATOM    539  N   LEU A  74      55.377   1.030  26.402  1.00 46.64           N  
ATOM    540  CA  LEU A  74      54.386   0.123  26.957  1.00 48.62           C  
ATOM    541  C   LEU A  74      55.062  -1.159  27.455  1.00 50.46           C  
ATOM    542  O   LEU A  74      54.783  -1.656  28.551  1.00 50.28           O  
ATOM    543  CB  LEU A  74      53.364  -0.239  25.883  1.00 48.05           C  
ATOM    544  CG  LEU A  74      51.922   0.145  26.183  1.00 48.52           C  
ATOM    545  CD1 LEU A  74      51.715   1.574  25.788  1.00 51.19           C  
ATOM    546  CD2 LEU A  74      50.971  -0.749  25.426  1.00 48.64           C  
ATOM    547  N   CYS A  75      55.968  -1.674  26.637  1.00 50.97           N  
ATOM    548  CA  CYS A  75      56.668  -2.909  26.936  1.00 52.75           C  
ATOM    549  C   CYS A  75      57.659  -2.880  28.082  1.00 55.01           C  
ATOM    550  O   CYS A  75      58.076  -3.937  28.561  1.00 56.33           O  
ATOM    551  CB  CYS A  75      57.355  -3.407  25.670  1.00 51.24           C  
ATOM    552  SG  CYS A  75      56.172  -4.210  24.547  1.00 52.24           S  
ATOM    553  N   THR A  76      58.044  -1.688  28.524  1.00 57.71           N  
ATOM    554  CA  THR A  76      58.995  -1.582  29.629  1.00 59.80           C  
ATOM    555  C   THR A  76      58.329  -1.861  30.982  1.00 59.65           C  
ATOM    556  O   THR A  76      58.991  -2.282  31.930  1.00 59.78           O  
ATOM    557  CB  THR A  76      59.668  -0.190  29.669  1.00 60.05           C  
ATOM    558  OG1 THR A  76      58.664   0.828  29.752  1.00 61.36           O  
ATOM    559  CG2 THR A  76      60.512   0.027  28.419  1.00 57.58           C  
ATOM    560  N   VAL A  77      57.020  -1.630  31.060  1.00 59.52           N  
ATOM    561  CA  VAL A  77      56.258  -1.874  32.281  1.00 60.44           C  
ATOM    562  C   VAL A  77      56.572  -3.274  32.830  1.00 63.23           C  
ATOM    563  O   VAL A  77      56.179  -4.283  32.234  1.00 65.28           O  
ATOM    564  CB  VAL A  77      54.744  -1.759  31.996  1.00 59.28           C  
ATOM    565  CG1 VAL A  77      53.939  -2.387  33.120  1.00 59.95           C  
ATOM    566  CG2 VAL A  77      54.369  -0.301  31.823  1.00 58.08           C  
ATOM    567  N   ALA A  78      57.265  -3.326  33.969  1.00 64.11           N  
ATOM    568  CA  ALA A  78      57.669  -4.591  34.598  1.00 64.73           C  
ATOM    569  C   ALA A  78      56.544  -5.486  35.143  1.00 65.50           C  
ATOM    570  O   ALA A  78      56.721  -6.702  35.264  1.00 64.17           O  
ATOM    571  CB  ALA A  78      58.685  -4.310  35.702  1.00 63.86           C  
ATOM    572  N   THR A  79      55.397  -4.896  35.471  1.00 66.58           N  
ATOM    573  CA  THR A  79      54.269  -5.662  36.000  1.00 67.84           C  
ATOM    574  C   THR A  79      53.285  -6.036  34.892  1.00 68.82           C  
ATOM    575  O   THR A  79      52.172  -6.503  35.161  1.00 68.81           O  
ATOM    576  CB  THR A  79      53.505  -4.856  37.072  1.00 67.87           C  
ATOM    577  N   LEU A  80      53.711  -5.830  33.648  1.00 68.56           N  
ATOM    578  CA  LEU A  80      52.887  -6.117  32.479  1.00 66.92           C  
ATOM    579  C   LEU A  80      52.322  -7.531  32.491  1.00 66.84           C  
ATOM    580  O   LEU A  80      51.104  -7.716  32.530  1.00 66.99           O  
ATOM    581  CB  LEU A  80      53.699  -5.892  31.196  1.00 64.83           C  
ATOM    582  CG  LEU A  80      52.920  -5.734  29.884  1.00 61.76           C  
ATOM    583  CD1 LEU A  80      52.101  -4.458  29.904  1.00 60.38           C  
ATOM    584  CD2 LEU A  80      53.890  -5.706  28.732  1.00 59.56           C  
ATOM    585  N   ARG A  81      53.208  -8.523  32.462  1.00 66.02           N  
ATOM    586  CA  ARG A  81      52.794  -9.922  32.461  1.00 65.82           C  
ATOM    587  C   ARG A  81      51.835 -10.255  33.599  1.00 67.10           C  
ATOM    588  O   ARG A  81      50.738 -10.772  33.368  1.00 65.42           O  
ATOM    589  CB  ARG A  81      54.015 -10.833  32.558  1.00 64.72           C  
ATOM    590  CG  ARG A  81      53.667 -12.288  32.826  1.00 64.38           C  
ATOM    591  CD  ARG A  81      54.536 -13.227  32.009  1.00 65.20           C  
ATOM    592  NE  ARG A  81      53.881 -13.625  30.765  1.00 67.30           N  
ATOM    593  CZ  ARG A  81      54.440 -13.549  29.560  1.00 65.57           C  
ATOM    594  NH1 ARG A  81      55.677 -13.086  29.419  1.00 64.01           N  
ATOM    595  NH2 ARG A  81      53.758 -13.935  28.491  1.00 64.03           N  
ATOM    596  N   GLU A  82      52.259  -9.958  34.826  1.00 68.54           N  
ATOM    597  CA  GLU A  82      51.458 -10.234  36.018  1.00 68.44           C  
ATOM    598  C   GLU A  82      50.065  -9.593  35.994  1.00 68.93           C  
ATOM    599  O   GLU A  82      49.082 -10.230  36.379  1.00 70.41           O  
ATOM    600  CB  GLU A  82      52.216  -9.784  37.273  1.00 66.33           C  
ATOM    601  N   THR A  83      49.973  -8.346  35.538  1.00 67.86           N  
ATOM    602  CA  THR A  83      48.685  -7.660  35.495  1.00 67.04           C  
ATOM    603  C   THR A  83      47.905  -7.873  34.212  1.00 67.40           C  
ATOM    604  O   THR A  83      46.708  -8.171  34.243  1.00 67.61           O  
ATOM    605  CB  THR A  83      48.840  -6.147  35.654  1.00 66.54           C  
ATOM    606  OG1 THR A  83      49.571  -5.863  36.852  1.00 67.61           O  
ATOM    607  CG2 THR A  83      47.463  -5.481  35.711  1.00 64.67           C  
ATOM    608  N   TYR A  84      48.583  -7.709  33.085  1.00 66.44           N  
ATOM    609  CA  TYR A  84      47.931  -7.843  31.793  1.00 67.22           C  
ATOM    610  C   TYR A  84      48.035  -9.216  31.130  1.00 67.64           C  
ATOM    611  O   TYR A  84      47.144  -9.607  30.374  1.00 68.11           O  
ATOM    612  CB  TYR A  84      48.448  -6.737  30.873  1.00 66.65           C  
ATOM    613  CG  TYR A  84      48.183  -5.365  31.451  1.00 64.67           C  
ATOM    614  CD1 TYR A  84      46.898  -4.812  31.416  1.00 62.82           C  
ATOM    615  CD2 TYR A  84      49.198  -4.640  32.080  1.00 62.64           C  
ATOM    616  CE1 TYR A  84      46.628  -3.576  31.995  1.00 62.18           C  
ATOM    617  CE2 TYR A  84      48.940  -3.400  32.663  1.00 63.31           C  
ATOM    618  CZ  TYR A  84      47.652  -2.874  32.618  1.00 63.16           C  
ATOM    619  OH  TYR A  84      47.393  -1.650  33.199  1.00 63.98           O  
ATOM    620  N   GLY A  85      49.108  -9.949  31.413  1.00 66.81           N  
ATOM    621  CA  GLY A  85      49.263 -11.277  30.840  1.00 66.91           C  
ATOM    622  C   GLY A  85      49.540 -11.375  29.346  1.00 66.49           C  
ATOM    623  O   GLY A  85      50.611 -10.983  28.882  1.00 67.17           O  
ATOM    624  N   GLU A  86      48.578 -11.914  28.597  1.00 65.32           N  
ATOM    625  CA  GLU A  86      48.715 -12.085  27.151  1.00 64.11           C  
ATOM    626  C   GLU A  86      49.270 -10.841  26.503  1.00 61.72           C  
ATOM    627  O   GLU A  86      50.144 -10.909  25.643  1.00 62.46           O  
ATOM    628  CB  GLU A  86      47.368 -12.395  26.517  1.00 65.94           C  
ATOM    629  CG  GLU A  86      46.774 -13.698  26.949  1.00 68.71           C  
ATOM    630  CD  GLU A  86      45.335 -13.799  26.536  1.00 72.13           C  
ATOM    631  OE1 GLU A  86      45.084 -13.919  25.317  1.00 72.66           O  
ATOM    632  OE2 GLU A  86      44.460 -13.745  27.428  1.00 74.35           O  
ATOM    633  N   MET A  87      48.735  -9.704  26.916  1.00 57.94           N  
ATOM    634  CA  MET A  87      49.171  -8.423  26.401  1.00 55.40           C  
ATOM    635  C   MET A  87      50.702  -8.329  26.425  1.00 53.05           C  
ATOM    636  O   MET A  87      51.305  -7.691  25.561  1.00 53.02           O  
ATOM    637  CB  MET A  87      48.543  -7.318  27.250  1.00 56.95           C  
ATOM    638  CG  MET A  87      49.324  -6.030  27.313  1.00 58.46           C  
ATOM    639  SD  MET A  87      48.244  -4.597  27.226  1.00 60.60           S  
ATOM    640  CE  MET A  87      46.961  -5.176  26.147  1.00 59.45           C  
ATOM    641  N   ALA A  88      51.320  -8.981  27.409  1.00 49.99           N  
ATOM    642  CA  ALA A  88      52.775  -8.975  27.564  1.00 47.58           C  
ATOM    643  C   ALA A  88      53.505  -9.817  26.516  1.00 45.74           C  
ATOM    644  O   ALA A  88      54.729  -9.742  26.390  1.00 44.28           O  
ATOM    645  CB  ALA A  88      53.152  -9.451  28.966  1.00 45.30           C  
ATOM    646  N   ASP A  89      52.754 -10.623  25.773  1.00 45.72           N  
ATOM    647  CA  ASP A  89      53.341 -11.464  24.735  1.00 46.28           C  
ATOM    648  C   ASP A  89      53.544 -10.664  23.440  1.00 46.21           C  
ATOM    649  O   ASP A  89      54.346 -11.041  22.580  1.00 44.15           O  
ATOM    650  CB  ASP A  89      52.445 -12.683  24.478  1.00 47.21           C  
ATOM    651  CG  ASP A  89      52.604 -13.764  25.541  1.00 48.57           C  
ATOM    652  OD1 ASP A  89      53.720 -13.913  26.081  1.00 49.00           O  
ATOM    653  OD2 ASP A  89      51.616 -14.469  25.838  1.00 48.38           O  
ATOM    654  N   CYS A  90      52.814  -9.557  23.310  1.00 45.95           N  
ATOM    655  CA  CYS A  90      52.937  -8.697  22.138  1.00 46.73           C  
ATOM    656  C   CYS A  90      54.352  -8.167  22.111  1.00 46.15           C  
ATOM    657  O   CYS A  90      54.938  -7.981  21.055  1.00 48.74           O  
ATOM    658  CB  CYS A  90      51.985  -7.506  22.226  1.00 44.53           C  
ATOM    659  SG  CYS A  90      50.248  -7.942  22.509  1.00 47.93           S  
ATOM    660  N   CYS A  91      54.891  -7.921  23.295  1.00 47.97           N  
ATOM    661  CA  CYS A  91      56.236  -7.393  23.432  1.00 48.96           C  
ATOM    662  C   CYS A  91      57.271  -8.294  22.792  1.00 50.50           C  
ATOM    663  O   CYS A  91      58.400  -7.872  22.549  1.00 51.62           O  
ATOM    664  CB  CYS A  91      56.557  -7.184  24.907  1.00 47.98           C  
ATOM    665  SG  CYS A  91      55.585  -5.825  25.624  1.00 48.20           S  
ATOM    666  N   ALA A  92      56.881  -9.534  22.513  1.00 51.76           N  
ATOM    667  CA  ALA A  92      57.787 -10.485  21.888  1.00 54.13           C  
ATOM    668  C   ALA A  92      57.760 -10.328  20.368  1.00 56.30           C  
ATOM    669  O   ALA A  92      58.711 -10.697  19.687  1.00 57.81           O  
ATOM    670  CB  ALA A  92      57.403 -11.907  22.277  1.00 51.61           C  
ATOM    671  N   LYS A  93      56.671  -9.770  19.844  1.00 57.92           N  
ATOM    672  CA  LYS A  93      56.521  -9.575  18.403  1.00 61.17           C  
ATOM    673  C   LYS A  93      57.371  -8.421  17.865  1.00 64.37           C  
ATOM    674  O   LYS A  93      57.906  -7.626  18.638  1.00 64.12           O  
ATOM    675  CB  LYS A  93      55.053  -9.311  18.056  1.00 60.20           C  
ATOM    676  CG  LYS A  93      54.054 -10.058  18.919  1.00 60.14           C  
ATOM    677  CD  LYS A  93      52.916 -10.604  18.080  1.00 61.52           C  
ATOM    678  CE  LYS A  93      52.870 -12.116  18.155  1.00 63.17           C  
ATOM    679  NZ  LYS A  93      52.353 -12.569  19.478  1.00 64.72           N  
ATOM    680  N   GLN A  94      57.494  -8.353  16.536  1.00 69.01           N  
ATOM    681  CA  GLN A  94      58.239  -7.292  15.853  1.00 71.76           C  
ATOM    682  C   GLN A  94      57.291  -6.106  15.813  1.00 73.03           C  
ATOM    683  O   GLN A  94      56.070  -6.293  15.825  1.00 73.68           O  
ATOM    684  CB  GLN A  94      58.615  -7.719  14.427  1.00 72.28           C  
ATOM    685  N   GLU A  95      57.825  -4.888  15.753  1.00 74.92           N  
ATOM    686  CA  GLU A  95      56.940  -3.727  15.777  1.00 76.27           C  
ATOM    687  C   GLU A  95      55.709  -3.833  14.903  1.00 75.74           C  
ATOM    688  O   GLU A  95      54.590  -3.709  15.400  1.00 80.10           O  
ATOM    689  CB  GLU A  95      57.666  -2.414  15.431  1.00 76.42           C  
ATOM    690  CG  GLU A  95      56.771  -1.144  15.574  1.00 77.54           C  
ATOM    691  CD  GLU A  95      55.491  -1.369  16.405  1.00 77.21           C  
ATOM    692  OE1 GLU A  95      55.588  -1.796  17.580  1.00 75.06           O  
ATOM    693  OE2 GLU A  95      54.382  -1.127  15.878  1.00 75.41           O  
ATOM    694  N   PRO A  96      55.881  -4.047  13.595  1.00 72.51           N  
ATOM    695  CA  PRO A  96      54.674  -4.129  12.770  1.00 69.72           C  
ATOM    696  C   PRO A  96      53.506  -4.822  13.438  1.00 68.20           C  
ATOM    697  O   PRO A  96      52.467  -4.205  13.635  1.00 67.06           O  
ATOM    698  CB  PRO A  96      55.155  -4.784  11.475  1.00 69.32           C  
ATOM    699  CG  PRO A  96      56.605  -4.366  11.416  1.00 70.09           C  
ATOM    700  CD  PRO A  96      57.116  -4.131  12.799  1.00 70.85           C  
ATOM    701  N   GLU A  97      53.733  -6.055  13.879  1.00 65.56           N  
ATOM    702  CA  GLU A  97      52.717  -6.874  14.520  1.00 61.27           C  
ATOM    703  C   GLU A  97      52.454  -6.549  15.983  1.00 55.38           C  
ATOM    704  O   GLU A  97      51.362  -6.797  16.472  1.00 54.17           O  
ATOM    705  CB  GLU A  97      53.105  -8.345  14.374  1.00 64.86           C  
ATOM    706  CG  GLU A  97      53.708  -8.702  13.010  1.00 68.84           C  
ATOM    707  CD  GLU A  97      55.125  -9.242  13.126  1.00 72.99           C  
ATOM    708  OE1 GLU A  97      56.068  -8.431  13.287  1.00 73.25           O  
ATOM    709  OE2 GLU A  97      55.294 -10.479  13.062  1.00 75.44           O  
ATOM    710  N   ARG A  98      53.458  -6.015  16.672  1.00 48.26           N  
ATOM    711  CA  ARG A  98      53.342  -5.640  18.076  1.00 45.27           C  
ATOM    712  C   ARG A  98      52.155  -4.706  18.280  1.00 45.14           C  
ATOM    713  O   ARG A  98      51.277  -4.970  19.098  1.00 45.19           O  
ATOM    714  CB  ARG A  98      54.616  -4.932  18.530  1.00 41.57           C  
ATOM    715  CG  ARG A  98      54.935  -5.088  19.991  1.00 40.77           C  
ATOM    716  CD  ARG A  98      56.232  -4.390  20.333  1.00 37.49           C  
ATOM    717  NE  ARG A  98      56.239  -3.027  19.823  1.00 34.76           N  
ATOM    718  CZ  ARG A  98      57.214  -2.157  20.051  1.00 32.83           C  
ATOM    719  NH1 ARG A  98      58.254  -2.519  20.784  1.00 31.39           N  
ATOM    720  NH2 ARG A  98      57.145  -0.931  19.552  1.00 31.79           N  
ATOM    721  N   ASN A  99      52.137  -3.611  17.528  1.00 45.80           N  
ATOM    722  CA  ASN A  99      51.065  -2.628  17.615  1.00 46.96           C  
ATOM    723  C   ASN A  99      49.696  -3.284  17.425  1.00 46.36           C  
ATOM    724  O   ASN A  99      48.770  -3.059  18.205  1.00 45.02           O  
ATOM    725  CB  ASN A  99      51.278  -1.533  16.557  1.00 48.60           C  
ATOM    726  CG  ASN A  99      50.160  -0.496  16.545  1.00 51.11           C  
ATOM    727  OD1 ASN A  99      49.233  -0.564  15.729  1.00 50.72           O  
ATOM    728  ND2 ASN A  99      50.245   0.472  17.452  1.00 52.14           N  
ATOM    729  N   GLU A 100      49.576  -4.097  16.382  1.00 46.71           N  
ATOM    730  CA  GLU A 100      48.326  -4.778  16.087  1.00 46.89           C  
ATOM    731  C   GLU A 100      47.928  -5.698  17.232  1.00 46.48           C  
ATOM    732  O   GLU A 100      46.744  -5.873  17.519  1.00 46.07           O  
ATOM    733  CB  GLU A 100      48.466  -5.584  14.797  1.00 51.79           C  
ATOM    734  CG  GLU A 100      47.158  -6.164  14.275  1.00 58.93           C  
ATOM    735  CD  GLU A 100      46.131  -5.096  13.932  1.00 62.60           C  
ATOM    736  OE1 GLU A 100      46.513  -3.910  13.803  1.00 64.29           O  
ATOM    737  OE2 GLU A 100      44.937  -5.447  13.790  1.00 63.95           O  
ATOM    738  N   CYS A 101      48.919  -6.290  17.886  1.00 45.93           N  
ATOM    739  CA  CYS A 101      48.655  -7.180  19.007  1.00 46.41           C  
ATOM    740  C   CYS A 101      48.035  -6.407  20.169  1.00 45.61           C  
ATOM    741  O   CYS A 101      47.176  -6.926  20.877  1.00 45.86           O  
ATOM    742  CB  CYS A 101      49.950  -7.847  19.477  1.00 48.16           C  
ATOM    743  SG  CYS A 101      49.724  -9.009  20.865  1.00 51.03           S  
ATOM    744  N   PHE A 102      48.474  -5.166  20.360  1.00 43.92           N  
ATOM    745  CA  PHE A 102      47.961  -4.337  21.440  1.00 42.34           C  
ATOM    746  C   PHE A 102      46.507  -3.948  21.217  1.00 43.88           C  
ATOM    747  O   PHE A 102      45.700  -4.028  22.139  1.00 46.46           O  
ATOM    748  CB  PHE A 102      48.821  -3.080  21.604  1.00 39.95           C  
ATOM    749  CG  PHE A 102      50.143  -3.336  22.276  1.00 38.12           C  
ATOM    750  CD1 PHE A 102      50.202  -4.010  23.490  1.00 39.95           C  
ATOM    751  CD2 PHE A 102      51.336  -2.916  21.689  1.00 38.74           C  
ATOM    752  CE1 PHE A 102      51.434  -4.267  24.114  1.00 39.55           C  
ATOM    753  CE2 PHE A 102      52.574  -3.169  22.304  1.00 37.63           C  
ATOM    754  CZ  PHE A 102      52.620  -3.844  23.516  1.00 38.75           C  
ATOM    755  N   LEU A 103      46.166  -3.532  20.000  1.00 45.07           N  
ATOM    756  CA  LEU A 103      44.788  -3.141  19.697  1.00 47.96           C  
ATOM    757  C   LEU A 103      43.832  -4.295  19.982  1.00 49.69           C  
ATOM    758  O   LEU A 103      42.678  -4.084  20.359  1.00 50.88           O  
ATOM    759  CB  LEU A 103      44.643  -2.734  18.224  1.00 46.84           C  
ATOM    760  CG  LEU A 103      45.545  -1.651  17.634  1.00 47.32           C  
ATOM    761  CD1 LEU A 103      45.208  -1.489  16.165  1.00 45.18           C  
ATOM    762  CD2 LEU A 103      45.353  -0.334  18.374  1.00 46.82           C  
ATOM    763  N   GLN A 104      44.320  -5.515  19.787  1.00 51.95           N  
ATOM    764  CA  GLN A 104      43.519  -6.714  20.003  1.00 53.86           C  
ATOM    765  C   GLN A 104      43.119  -6.882  21.465  1.00 54.95           C  
ATOM    766  O   GLN A 104      41.970  -7.200  21.767  1.00 53.84           O  
ATOM    767  CB  GLN A 104      44.298  -7.949  19.547  1.00 53.86           C  
ATOM    768  CG  GLN A 104      44.097  -8.328  18.097  1.00 54.89           C  
ATOM    769  CD  GLN A 104      45.338  -8.955  17.483  1.00 60.27           C  
ATOM    770  OE1 GLN A 104      46.283  -9.321  18.188  1.00 62.67           O  
ATOM    771  NE2 GLN A 104      45.342  -9.082  16.161  1.00 61.06           N  
ATOM    772  N   HIS A 105      44.073  -6.665  22.367  1.00 56.95           N  
ATOM    773  CA  HIS A 105      43.828  -6.810  23.797  1.00 60.07           C  
ATOM    774  C   HIS A 105      43.361  -5.516  24.454  1.00 61.02           C  
ATOM    775  O   HIS A 105      43.374  -5.391  25.675  1.00 62.52           O  
ATOM    776  CB  HIS A 105      45.090  -7.325  24.501  1.00 61.11           C  
ATOM    777  CG  HIS A 105      45.688  -8.537  23.856  1.00 64.01           C  
ATOM    778  ND1 HIS A 105      45.024  -9.741  23.772  1.00 65.64           N  
ATOM    779  CD2 HIS A 105      46.877  -8.720  23.234  1.00 65.79           C  
ATOM    780  CE1 HIS A 105      45.775 -10.614  23.124  1.00 66.75           C  
ATOM    781  NE2 HIS A 105      46.906 -10.018  22.786  1.00 66.75           N  
ATOM    782  N   LYS A 106      42.948  -4.551  23.646  1.00 62.49           N  
ATOM    783  CA  LYS A 106      42.464  -3.294  24.190  1.00 64.78           C  
ATOM    784  C   LYS A 106      41.002  -3.490  24.544  1.00 68.05           C  
ATOM    785  O   LYS A 106      40.124  -3.458  23.672  1.00 69.12           O  
ATOM    786  CB  LYS A 106      42.612  -2.166  23.163  1.00 63.19           C  
ATOM    787  CG  LYS A 106      42.814  -0.796  23.788  1.00 57.69           C  
ATOM    788  CD  LYS A 106      42.293   0.294  22.883  1.00 54.06           C  
ATOM    789  CE  LYS A 106      43.376   1.307  22.585  1.00 53.93           C  
ATOM    790  NZ  LYS A 106      42.919   2.322  21.602  1.00 53.06           N  
ATOM    791  N   ASP A 107      40.746  -3.690  25.829  1.00 70.81           N  
ATOM    792  CA  ASP A 107      39.397  -3.916  26.320  1.00 74.67           C  
ATOM    793  C   ASP A 107      38.454  -2.733  26.207  1.00 75.53           C  
ATOM    794  O   ASP A 107      38.809  -1.610  26.581  1.00 77.01           O  
ATOM    795  CB  ASP A 107      39.467  -4.363  27.791  1.00 76.18           C  
ATOM    796  CG  ASP A 107      38.266  -5.179  28.218  1.00 77.52           C  
ATOM    797  OD1 ASP A 107      37.122  -4.677  28.145  1.00 78.45           O  
ATOM    798  OD2 ASP A 107      38.469  -6.339  28.616  1.00 78.49           O  
ATOM    799  N   ASP A 108      37.255  -2.977  25.688  1.00 76.53           N  
ATOM    800  CA  ASP A 108      36.253  -1.927  25.573  1.00 78.78           C  
ATOM    801  C   ASP A 108      35.355  -2.279  26.734  1.00 80.71           C  
ATOM    802  O   ASP A 108      35.032  -3.448  26.898  1.00 84.07           O  
ATOM    803  CB  ASP A 108      35.488  -2.063  24.253  1.00 77.59           C  
ATOM    804  N   ASN A 109      34.972  -1.305  27.528  1.00 79.97           N  
ATOM    805  CA  ASN A 109      34.155  -1.571  28.665  1.00 79.41           C  
ATOM    806  C   ASN A 109      34.614  -2.609  29.731  1.00 78.23           C  
ATOM    807  O   ASN A 109      33.824  -3.536  30.069  1.00 77.33           O  
ATOM    808  CB  ASN A 109      32.737  -1.971  28.225  1.00 81.47           C  
ATOM    809  CG  ASN A 109      31.652  -1.319  29.044  1.00 84.62           C  
ATOM    810  OD1 ASN A 109      30.459  -1.580  28.811  1.00 85.60           O  
ATOM    811  ND2 ASN A 109      32.032  -0.489  29.995  1.00 86.19           N  
ATOM    812  N   PRO A 110      35.847  -2.475  30.291  1.00 76.75           N  
ATOM    813  CA  PRO A 110      36.610  -3.213  31.322  1.00 75.36           C  
ATOM    814  C   PRO A 110      35.832  -3.457  32.641  1.00 74.43           C  
ATOM    815  O   PRO A 110      34.684  -2.996  32.770  1.00 74.49           O  
ATOM    816  CB  PRO A 110      37.828  -2.315  31.615  1.00 74.70           C  
ATOM    817  CG  PRO A 110      38.109  -1.790  30.288  1.00 75.93           C  
ATOM    818  CD  PRO A 110      36.739  -1.426  29.714  1.00 75.91           C  
ATOM    819  N   ASN A 111      36.508  -4.065  33.619  1.00 71.12           N  
ATOM    820  CA  ASN A 111      35.921  -4.370  34.935  1.00 66.21           C  
ATOM    821  C   ASN A 111      36.326  -3.294  35.935  1.00 61.52           C  
ATOM    822  O   ASN A 111      37.206  -3.504  36.771  1.00 60.63           O  
ATOM    823  CB  ASN A 111      36.421  -5.734  35.398  1.00 66.41           C  
ATOM    824  N   LEU A 112      35.657  -2.149  35.850  1.00 55.19           N  
ATOM    825  CA  LEU A 112      35.945  -1.028  36.727  1.00 50.73           C  
ATOM    826  C   LEU A 112      34.676  -0.477  37.337  1.00 47.95           C  
ATOM    827  O   LEU A 112      33.621  -0.498  36.709  1.00 46.83           O  
ATOM    828  CB  LEU A 112      36.654   0.086  35.955  1.00 48.16           C  
ATOM    829  CG  LEU A 112      38.053  -0.205  35.417  1.00 46.43           C  
ATOM    830  CD1 LEU A 112      38.448   0.886  34.440  1.00 48.20           C  
ATOM    831  CD2 LEU A 112      39.040  -0.283  36.564  1.00 43.27           C  
ATOM    832  N   PRO A 113      34.773   0.048  38.570  1.00 46.75           N  
ATOM    833  CA  PRO A 113      33.627   0.617  39.284  1.00 46.02           C  
ATOM    834  C   PRO A 113      33.162   1.914  38.650  1.00 46.24           C  
ATOM    835  O   PRO A 113      33.974   2.699  38.160  1.00 46.28           O  
ATOM    836  CB  PRO A 113      34.150   0.856  40.705  1.00 44.51           C  
ATOM    837  CG  PRO A 113      35.514   0.248  40.763  1.00 45.45           C  
ATOM    838  CD  PRO A 113      36.013   0.147  39.359  1.00 47.22           C  
ATOM    839  N   ARG A 114      31.854   2.135  38.658  1.00 47.62           N  
ATOM    840  CA  ARG A 114      31.305   3.359  38.104  1.00 49.37           C  
ATOM    841  C   ARG A 114      31.921   4.513  38.897  1.00 49.17           C  
ATOM    842  O   ARG A 114      32.302   4.350  40.057  1.00 47.79           O  
ATOM    843  CB  ARG A 114      29.781   3.369  38.251  1.00 52.94           C  
ATOM    844  CG  ARG A 114      29.297   4.144  39.458  1.00 58.84           C  
ATOM    845  CD  ARG A 114      28.040   3.551  40.064  1.00 63.06           C  
ATOM    846  NE  ARG A 114      27.052   4.577  40.399  1.00 67.15           N  
ATOM    847  CZ  ARG A 114      27.336   5.776  40.908  1.00 69.51           C  
ATOM    848  NH1 ARG A 114      28.592   6.128  41.157  1.00 69.76           N  
ATOM    849  NH2 ARG A 114      26.356   6.626  41.183  1.00 71.25           N  
ATOM    850  N   LEU A 115      32.028   5.675  38.268  1.00 49.39           N  
ATOM    851  CA  LEU A 115      32.597   6.836  38.931  1.00 48.47           C  
ATOM    852  C   LEU A 115      31.530   7.599  39.699  1.00 48.28           C  
ATOM    853  O   LEU A 115      30.598   8.148  39.110  1.00 46.81           O  
ATOM    854  CB  LEU A 115      33.241   7.767  37.905  1.00 48.51           C  
ATOM    855  CG  LEU A 115      34.728   7.597  37.591  1.00 48.90           C  
ATOM    856  CD1 LEU A 115      35.245   8.870  36.938  1.00 50.09           C  
ATOM    857  CD2 LEU A 115      35.506   7.298  38.856  1.00 48.94           C  
ATOM    858  N   VAL A 116      31.666   7.623  41.019  1.00 49.27           N  
ATOM    859  CA  VAL A 116      30.721   8.345  41.864  1.00 50.75           C  
ATOM    860  C   VAL A 116      31.190   9.800  41.938  1.00 49.01           C  
ATOM    861  O   VAL A 116      32.341  10.073  42.288  1.00 47.53           O  
ATOM    862  CB  VAL A 116      30.658   7.737  43.308  1.00 52.86           C  
ATOM    863  CG1 VAL A 116      30.397   6.240  43.236  1.00 53.18           C  
ATOM    864  CG2 VAL A 116      31.968   7.998  44.065  1.00 53.12           C  
ATOM    865  N   ARG A 117      30.309  10.732  41.596  1.00 48.23           N  
ATOM    866  CA  ARG A 117      30.666  12.145  41.637  1.00 50.99           C  
ATOM    867  C   ARG A 117      30.585  12.721  43.066  1.00 52.23           C  
ATOM    868  O   ARG A 117      29.495  12.794  43.646  1.00 52.57           O  
ATOM    869  CB  ARG A 117      29.748  12.929  40.695  1.00 51.44           C  
ATOM    870  CG  ARG A 117      30.109  14.394  40.543  1.00 55.52           C  
ATOM    871  CD  ARG A 117      28.862  15.232  40.309  1.00 59.50           C  
ATOM    872  NE  ARG A 117      28.107  14.758  39.151  1.00 64.49           N  
ATOM    873  CZ  ARG A 117      27.112  15.427  38.572  1.00 66.65           C  
ATOM    874  NH1 ARG A 117      26.739  16.611  39.041  1.00 68.04           N  
ATOM    875  NH2 ARG A 117      26.492  14.913  37.515  1.00 67.38           N  
ATOM    876  N   PRO A 118      31.745  13.118  43.655  1.00 52.33           N  
ATOM    877  CA  PRO A 118      31.843  13.693  45.010  1.00 50.36           C  
ATOM    878  C   PRO A 118      30.938  14.901  45.244  1.00 50.82           C  
ATOM    879  O   PRO A 118      30.079  15.226  44.417  1.00 51.32           O  
ATOM    880  CB  PRO A 118      33.319  14.083  45.146  1.00 48.40           C  
ATOM    881  CG  PRO A 118      34.037  13.248  44.158  1.00 47.82           C  
ATOM    882  CD  PRO A 118      33.075  12.995  43.024  1.00 52.60           C  
ATOM    883  N   GLU A 119      31.131  15.563  46.381  1.00 50.70           N  
ATOM    884  CA  GLU A 119      30.334  16.738  46.703  1.00 48.66           C  
ATOM    885  C   GLU A 119      31.063  17.962  46.166  1.00 46.85           C  
ATOM    886  O   GLU A 119      32.268  18.124  46.374  1.00 43.97           O  
ATOM    887  CB  GLU A 119      30.125  16.849  48.216  1.00 49.27           C  
ATOM    888  N   VAL A 120      30.319  18.813  45.469  1.00 46.78           N  
ATOM    889  CA  VAL A 120      30.865  20.020  44.859  1.00 47.74           C  
ATOM    890  C   VAL A 120      31.971  20.675  45.663  1.00 48.50           C  
ATOM    891  O   VAL A 120      32.955  21.159  45.101  1.00 50.76           O  
ATOM    892  CB  VAL A 120      29.763  21.073  44.615  1.00 46.87           C  
ATOM    893  CG1 VAL A 120      30.372  22.342  44.039  1.00 46.41           C  
ATOM    894  CG2 VAL A 120      28.715  20.518  43.667  1.00 46.76           C  
ATOM    895  N   ASP A 121      31.817  20.676  46.980  1.00 48.61           N  
ATOM    896  CA  ASP A 121      32.797  21.312  47.846  1.00 48.62           C  
ATOM    897  C   ASP A 121      34.088  20.532  48.031  1.00 45.65           C  
ATOM    898  O   ASP A 121      35.143  21.121  48.278  1.00 44.07           O  
ATOM    899  CB  ASP A 121      32.158  21.617  49.202  1.00 56.93           C  
ATOM    900  CG  ASP A 121      31.058  22.666  49.102  1.00 63.14           C  
ATOM    901  OD1 ASP A 121      29.912  22.305  48.742  1.00 65.90           O  
ATOM    902  OD2 ASP A 121      31.341  23.854  49.379  1.00 66.77           O  
ATOM    903  N   VAL A 122      34.022  19.212  47.924  1.00 43.60           N  
ATOM    904  CA  VAL A 122      35.239  18.422  48.067  1.00 41.54           C  
ATOM    905  C   VAL A 122      36.051  18.582  46.787  1.00 38.50           C  
ATOM    906  O   VAL A 122      37.268  18.788  46.830  1.00 36.46           O  
ATOM    907  CB  VAL A 122      34.937  16.927  48.283  1.00 41.79           C  
ATOM    908  CG1 VAL A 122      36.138  16.256  48.916  1.00 40.99           C  
ATOM    909  CG2 VAL A 122      33.708  16.762  49.158  1.00 40.45           C  
ATOM    910  N   MET A 123      35.360  18.494  45.651  1.00 36.25           N  
ATOM    911  CA  MET A 123      35.991  18.646  44.344  1.00 36.68           C  
ATOM    912  C   MET A 123      36.683  19.999  44.300  1.00 37.00           C  
ATOM    913  O   MET A 123      37.899  20.083  44.150  1.00 36.32           O  
ATOM    914  CB  MET A 123      34.937  18.580  43.242  1.00 34.63           C  
ATOM    915  CG  MET A 123      34.323  17.214  43.084  1.00 34.93           C  
ATOM    916  SD  MET A 123      33.466  17.019  41.520  1.00 39.54           S  
ATOM    917  CE  MET A 123      31.874  17.694  41.882  1.00 33.72           C  
ATOM    918  N   CYS A 124      35.883  21.051  44.454  1.00 38.95           N  
ATOM    919  CA  CYS A 124      36.355  22.429  44.450  1.00 36.83           C  
ATOM    920  C   CYS A 124      37.588  22.628  45.307  1.00 36.16           C  
ATOM    921  O   CYS A 124      38.528  23.304  44.904  1.00 36.98           O  
ATOM    922  CB  CYS A 124      35.245  23.350  44.938  1.00 39.26           C  
ATOM    923  SG  CYS A 124      34.116  23.859  43.612  1.00 46.37           S  
ATOM    924  N   THR A 125      37.584  22.038  46.494  1.00 38.33           N  
ATOM    925  CA  THR A 125      38.716  22.172  47.399  1.00 40.24           C  
ATOM    926  C   THR A 125      39.896  21.405  46.849  1.00 41.92           C  
ATOM    927  O   THR A 125      41.047  21.802  47.034  1.00 42.51           O  
ATOM    928  CB  THR A 125      38.384  21.628  48.796  1.00 40.93           C  
ATOM    929  OG1 THR A 125      37.240  22.319  49.308  1.00 44.47           O  
ATOM    930  CG2 THR A 125      39.573  21.815  49.749  1.00 39.99           C  
ATOM    931  N   ALA A 126      39.603  20.289  46.187  1.00 44.56           N  
ATOM    932  CA  ALA A 126      40.641  19.459  45.587  1.00 45.01           C  
ATOM    933  C   ALA A 126      41.194  20.247  44.406  1.00 46.04           C  
ATOM    934  O   ALA A 126      42.395  20.247  44.130  1.00 44.60           O  
ATOM    935  CB  ALA A 126      40.037  18.147  45.113  1.00 43.47           C  
ATOM    936  N   PHE A 127      40.282  20.936  43.733  1.00 48.35           N  
ATOM    937  CA  PHE A 127      40.586  21.754  42.575  1.00 54.37           C  
ATOM    938  C   PHE A 127      41.447  22.962  42.926  1.00 56.96           C  
ATOM    939  O   PHE A 127      42.090  23.544  42.058  1.00 58.42           O  
ATOM    940  CB  PHE A 127      39.272  22.213  41.940  1.00 56.84           C  
ATOM    941  CG  PHE A 127      39.446  23.027  40.692  1.00 62.43           C  
ATOM    942  CD1 PHE A 127      40.166  22.526  39.614  1.00 64.67           C  
ATOM    943  CD2 PHE A 127      38.874  24.293  40.585  1.00 63.85           C  
ATOM    944  CE1 PHE A 127      40.313  23.272  38.448  1.00 66.49           C  
ATOM    945  CE2 PHE A 127      39.015  25.047  39.424  1.00 65.03           C  
ATOM    946  CZ  PHE A 127      39.736  24.535  38.353  1.00 66.99           C  
ATOM    947  N   HIS A 128      41.460  23.335  44.197  1.00 60.45           N  
ATOM    948  CA  HIS A 128      42.225  24.482  44.642  1.00 63.39           C  
ATOM    949  C   HIS A 128      43.582  24.050  45.173  1.00 64.55           C  
ATOM    950  O   HIS A 128      44.616  24.501  44.681  1.00 65.28           O  
ATOM    951  CB  HIS A 128      41.460  25.224  45.743  1.00 67.10           C  
ATOM    952  CG  HIS A 128      42.247  26.301  46.416  1.00 70.89           C  
ATOM    953  ND1 HIS A 128      43.183  26.046  47.404  1.00 72.46           N  
ATOM    954  CD2 HIS A 128      42.252  27.648  46.242  1.00 72.17           C  
ATOM    955  CE1 HIS A 128      43.723  27.183  47.798  1.00 73.22           C  
ATOM    956  NE2 HIS A 128      43.181  28.166  47.114  1.00 74.23           N  
ATOM    957  N   ASP A 129      43.583  23.168  46.164  1.00 67.70           N  
ATOM    958  CA  ASP A 129      44.838  22.726  46.769  1.00 72.42           C  
ATOM    959  C   ASP A 129      45.811  22.108  45.776  1.00 73.54           C  
ATOM    960  O   ASP A 129      47.034  22.086  45.996  1.00 74.11           O  
ATOM    961  CB  ASP A 129      44.542  21.716  47.888  1.00 75.65           C  
ATOM    962  CG  ASP A 129      43.683  22.299  48.998  1.00 78.91           C  
ATOM    963  OD1 ASP A 129      43.690  23.544  49.194  1.00 79.12           O  
ATOM    964  OD2 ASP A 129      42.976  21.516  49.676  1.00 82.02           O  
ATOM    965  N   ASN A 130      45.260  21.597  44.675  1.00 73.95           N  
ATOM    966  CA  ASN A 130      46.105  21.003  43.657  1.00 73.42           C  
ATOM    967  C   ASN A 130      45.400  20.602  42.370  1.00 72.30           C  
ATOM    968  O   ASN A 130      45.022  19.464  42.145  1.00 73.60           O  
ATOM    969  CB  ASN A 130      46.866  19.812  44.261  1.00 75.48           C  
ATOM    970  CG  ASN A 130      47.789  19.131  43.256  1.00 77.01           C  
ATOM    971  OD1 ASN A 130      48.000  19.582  42.126  1.00 78.71           O  
ATOM    972  ND2 ASN A 130      48.351  17.999  43.685  1.00 77.69           N  
ATOM    973  N   GLU A 131      45.278  21.572  41.504  1.00 70.23           N  
ATOM    974  CA  GLU A 131      44.622  21.472  40.219  1.00 68.12           C  
ATOM    975  C   GLU A 131      45.027  20.468  39.123  1.00 67.01           C  
ATOM    976  O   GLU A 131      44.148  19.895  38.466  1.00 65.67           O  
ATOM    977  CB  GLU A 131      44.668  22.849  39.606  1.00 68.80           C  
ATOM    978  CG  GLU A 131      43.623  23.135  38.588  1.00 72.26           C  
ATOM    979  CD  GLU A 131      43.911  24.450  37.883  1.00 75.02           C  
ATOM    980  OE1 GLU A 131      44.978  25.059  38.149  1.00 75.62           O  
ATOM    981  OE2 GLU A 131      43.078  24.884  37.065  1.00 77.33           O  
ATOM    982  N   GLU A 132      46.332  20.298  38.891  1.00 65.74           N  
ATOM    983  CA  GLU A 132      46.818  19.411  37.823  1.00 65.10           C  
ATOM    984  C   GLU A 132      46.522  17.964  38.122  1.00 61.47           C  
ATOM    985  O   GLU A 132      45.874  17.294  37.327  1.00 61.94           O  
ATOM    986  CB  GLU A 132      48.319  19.623  37.564  1.00 69.58           C  
ATOM    987  CG  GLU A 132      48.615  19.967  36.103  1.00 74.30           C  
ATOM    988  CD  GLU A 132      49.731  19.138  35.521  1.00 76.44           C  
ATOM    989  OE1 GLU A 132      50.866  19.257  36.033  1.00 77.63           O  
ATOM    990  OE2 GLU A 132      49.461  18.367  34.576  1.00 76.70           O  
ATOM    991  N   THR A 133      46.951  17.500  39.285  1.00 56.13           N  
ATOM    992  CA  THR A 133      46.720  16.120  39.680  1.00 52.70           C  
ATOM    993  C   THR A 133      45.244  15.843  39.958  1.00 49.40           C  
ATOM    994  O   THR A 133      44.801  14.694  39.933  1.00 49.03           O  
ATOM    995  CB  THR A 133      47.575  15.758  40.898  1.00 52.24           C  
ATOM    996  OG1 THR A 133      46.756  15.717  42.074  1.00 53.46           O  
ATOM    997  CG2 THR A 133      48.698  16.790  41.058  1.00 53.03           C  
ATOM    998  N   PHE A 134      44.465  16.889  40.201  1.00 46.22           N  
ATOM    999  CA  PHE A 134      43.051  16.664  40.434  1.00 45.04           C  
ATOM   1000  C   PHE A 134      42.436  16.300  39.093  1.00 43.79           C  
ATOM   1001  O   PHE A 134      41.779  15.266  38.973  1.00 44.89           O  
ATOM   1002  CB  PHE A 134      42.351  17.913  41.004  1.00 42.98           C  
ATOM   1003  CG  PHE A 134      40.831  17.840  40.949  1.00 38.62           C  
ATOM   1004  CD1 PHE A 134      40.133  16.892  41.693  1.00 36.46           C  
ATOM   1005  CD2 PHE A 134      40.106  18.695  40.120  1.00 36.26           C  
ATOM   1006  CE1 PHE A 134      38.739  16.796  41.607  1.00 36.04           C  
ATOM   1007  CE2 PHE A 134      38.711  18.606  40.030  1.00 34.76           C  
ATOM   1008  CZ  PHE A 134      38.029  17.655  40.772  1.00 34.47           C  
ATOM   1009  N   LEU A 135      42.669  17.144  38.087  1.00 43.13           N  
ATOM   1010  CA  LEU A 135      42.127  16.932  36.741  1.00 42.02           C  
ATOM   1011  C   LEU A 135      42.805  15.799  35.970  1.00 39.81           C  
ATOM   1012  O   LEU A 135      42.171  15.155  35.136  1.00 39.44           O  
ATOM   1013  CB  LEU A 135      42.219  18.221  35.923  1.00 43.80           C  
ATOM   1014  CG  LEU A 135      41.375  19.414  36.377  1.00 44.21           C  
ATOM   1015  CD1 LEU A 135      42.085  20.701  35.985  1.00 44.70           C  
ATOM   1016  CD2 LEU A 135      39.994  19.359  35.749  1.00 44.06           C  
ATOM   1017  N   LYS A 136      44.086  15.562  36.240  1.00 37.65           N  
ATOM   1018  CA  LYS A 136      44.814  14.490  35.566  1.00 38.66           C  
ATOM   1019  C   LYS A 136      44.301  13.133  36.030  1.00 39.62           C  
ATOM   1020  O   LYS A 136      44.100  12.221  35.222  1.00 39.33           O  
ATOM   1021  CB  LYS A 136      46.313  14.577  35.859  1.00 39.07           C  
ATOM   1022  CG  LYS A 136      47.077  15.574  35.005  1.00 42.63           C  
ATOM   1023  CD  LYS A 136      46.460  15.718  33.623  1.00 48.13           C  
ATOM   1024  CE  LYS A 136      46.953  16.975  32.923  1.00 51.32           C  
ATOM   1025  NZ  LYS A 136      48.346  16.823  32.399  1.00 53.46           N  
ATOM   1026  N   LYS A 137      44.094  12.997  37.337  1.00 40.03           N  
ATOM   1027  CA  LYS A 137      43.607  11.742  37.879  1.00 38.89           C  
ATOM   1028  C   LYS A 137      42.250  11.427  37.260  1.00 39.17           C  
ATOM   1029  O   LYS A 137      41.970  10.281  36.922  1.00 40.84           O  
ATOM   1030  CB  LYS A 137      43.501  11.816  39.406  1.00 36.99           C  
ATOM   1031  N   TYR A 138      41.420  12.445  37.068  1.00 38.61           N  
ATOM   1032  CA  TYR A 138      40.098  12.211  36.506  1.00 40.62           C  
ATOM   1033  C   TYR A 138      40.090  11.981  35.005  1.00 39.75           C  
ATOM   1034  O   TYR A 138      39.217  11.283  34.481  1.00 39.21           O  
ATOM   1035  CB  TYR A 138      39.170  13.363  36.868  1.00 45.76           C  
ATOM   1036  CG  TYR A 138      38.314  13.049  38.069  1.00 54.09           C  
ATOM   1037  CD1 TYR A 138      37.221  12.192  37.958  1.00 56.80           C  
ATOM   1038  CD2 TYR A 138      38.602  13.599  39.322  1.00 56.47           C  
ATOM   1039  CE1 TYR A 138      36.432  11.891  39.061  1.00 60.73           C  
ATOM   1040  CE2 TYR A 138      37.820  13.303  40.433  1.00 60.42           C  
ATOM   1041  CZ  TYR A 138      36.735  12.450  40.294  1.00 61.74           C  
ATOM   1042  OH  TYR A 138      35.937  12.174  41.382  1.00 67.14           O  
ATOM   1043  N   LEU A 139      41.055  12.582  34.317  1.00 37.74           N  
ATOM   1044  CA  LEU A 139      41.185  12.420  32.876  1.00 34.13           C  
ATOM   1045  C   LEU A 139      41.573  10.961  32.699  1.00 31.60           C  
ATOM   1046  O   LEU A 139      41.078  10.260  31.816  1.00 26.23           O  
ATOM   1047  CB  LEU A 139      42.299  13.326  32.357  1.00 36.04           C  
ATOM   1048  CG  LEU A 139      42.627  13.298  30.864  1.00 33.90           C  
ATOM   1049  CD1 LEU A 139      41.377  13.626  30.062  1.00 30.42           C  
ATOM   1050  CD2 LEU A 139      43.744  14.293  30.574  1.00 30.90           C  
ATOM   1051  N   TYR A 140      42.456  10.521  33.585  1.00 30.00           N  
ATOM   1052  CA  TYR A 140      42.947   9.159  33.611  1.00 34.54           C  
ATOM   1053  C   TYR A 140      41.823   8.149  33.862  1.00 36.66           C  
ATOM   1054  O   TYR A 140      41.760   7.101  33.213  1.00 38.95           O  
ATOM   1055  CB  TYR A 140      44.019   9.043  34.697  1.00 37.51           C  
ATOM   1056  CG  TYR A 140      44.148   7.670  35.313  1.00 43.42           C  
ATOM   1057  CD1 TYR A 140      43.315   7.266  36.358  1.00 44.61           C  
ATOM   1058  CD2 TYR A 140      45.120   6.780  34.870  1.00 45.93           C  
ATOM   1059  CE1 TYR A 140      43.454   6.006  36.946  1.00 46.80           C  
ATOM   1060  CE2 TYR A 140      45.266   5.520  35.451  1.00 47.91           C  
ATOM   1061  CZ  TYR A 140      44.433   5.137  36.487  1.00 46.71           C  
ATOM   1062  OH  TYR A 140      44.590   3.892  37.053  1.00 43.87           O  
ATOM   1063  N   GLU A 141      40.937   8.467  34.802  1.00 36.74           N  
ATOM   1064  CA  GLU A 141      39.821   7.584  35.151  1.00 35.22           C  
ATOM   1065  C   GLU A 141      38.842   7.440  34.003  1.00 33.16           C  
ATOM   1066  O   GLU A 141      38.303   6.357  33.766  1.00 31.81           O  
ATOM   1067  CB  GLU A 141      39.067   8.119  36.384  1.00 36.74           C  
ATOM   1068  CG  GLU A 141      39.890   8.133  37.668  1.00 34.88           C  
ATOM   1069  CD  GLU A 141      40.231   6.734  38.168  1.00 37.38           C  
ATOM   1070  OE1 GLU A 141      39.622   5.758  37.676  1.00 36.97           O  
ATOM   1071  OE2 GLU A 141      41.108   6.610  39.055  1.00 35.83           O  
ATOM   1072  N   ILE A 142      38.600   8.545  33.310  1.00 31.56           N  
ATOM   1073  CA  ILE A 142      37.686   8.548  32.180  1.00 32.73           C  
ATOM   1074  C   ILE A 142      38.300   7.851  30.978  1.00 33.19           C  
ATOM   1075  O   ILE A 142      37.614   7.131  30.258  1.00 32.84           O  
ATOM   1076  CB  ILE A 142      37.327   9.968  31.757  1.00 35.19           C  
ATOM   1077  CG1 ILE A 142      36.751  10.734  32.951  1.00 38.31           C  
ATOM   1078  CG2 ILE A 142      36.341   9.921  30.601  1.00 32.08           C  
ATOM   1079  CD1 ILE A 142      35.461  10.137  33.513  1.00 43.50           C  
ATOM   1080  N   ALA A 143      39.596   8.071  30.773  1.00 33.43           N  
ATOM   1081  CA  ALA A 143      40.319   7.475  29.655  1.00 34.05           C  
ATOM   1082  C   ALA A 143      40.311   5.955  29.701  1.00 33.49           C  
ATOM   1083  O   ALA A 143      39.938   5.302  28.731  1.00 31.81           O  
ATOM   1084  CB  ALA A 143      41.768   7.981  29.634  1.00 35.24           C  
ATOM   1085  N   ARG A 144      40.731   5.397  30.830  1.00 34.41           N  
ATOM   1086  CA  ARG A 144      40.786   3.947  30.991  1.00 36.98           C  
ATOM   1087  C   ARG A 144      39.430   3.266  30.833  1.00 37.53           C  
ATOM   1088  O   ARG A 144      39.356   2.060  30.588  1.00 37.54           O  
ATOM   1089  CB  ARG A 144      41.373   3.599  32.360  1.00 39.82           C  
ATOM   1090  CG  ARG A 144      40.442   3.915  33.530  1.00 41.51           C  
ATOM   1091  CD  ARG A 144      41.225   4.363  34.740  1.00 41.58           C  
ATOM   1092  NE  ARG A 144      42.087   3.302  35.248  1.00 42.72           N  
ATOM   1093  CZ  ARG A 144      41.855   2.631  36.372  1.00 43.28           C  
ATOM   1094  NH1 ARG A 144      40.793   2.915  37.106  1.00 40.16           N  
ATOM   1095  NH2 ARG A 144      42.689   1.677  36.763  1.00 43.80           N  
ATOM   1096  N   ARG A 145      38.357   4.038  30.965  1.00 38.09           N  
ATOM   1097  CA  ARG A 145      37.013   3.493  30.842  1.00 39.49           C  
ATOM   1098  C   ARG A 145      36.430   3.637  29.427  1.00 41.98           C  
ATOM   1099  O   ARG A 145      35.484   2.934  29.051  1.00 41.76           O  
ATOM   1100  CB  ARG A 145      36.105   4.161  31.879  1.00 39.10           C  
ATOM   1101  CG  ARG A 145      36.562   3.930  33.323  1.00 40.48           C  
ATOM   1102  CD  ARG A 145      35.651   4.641  34.315  1.00 39.05           C  
ATOM   1103  NE  ARG A 145      35.641   4.009  35.630  1.00 36.67           N  
ATOM   1104  CZ  ARG A 145      36.592   4.176  36.544  1.00 39.05           C  
ATOM   1105  NH1 ARG A 145      37.626   4.962  36.284  1.00 37.87           N  
ATOM   1106  NH2 ARG A 145      36.507   3.569  37.723  1.00 37.53           N  
ATOM   1107  N   HIS A 146      36.991   4.554  28.644  1.00 44.45           N  
ATOM   1108  CA  HIS A 146      36.547   4.774  27.264  1.00 47.18           C  
ATOM   1109  C   HIS A 146      37.797   4.722  26.383  1.00 48.28           C  
ATOM   1110  O   HIS A 146      38.225   5.739  25.833  1.00 48.18           O  
ATOM   1111  CB  HIS A 146      35.855   6.137  27.146  1.00 47.47           C  
ATOM   1112  CG  HIS A 146      34.619   6.257  27.986  1.00 48.87           C  
ATOM   1113  ND1 HIS A 146      34.582   6.985  29.156  1.00 48.03           N  
ATOM   1114  CD2 HIS A 146      33.380   5.731  27.832  1.00 47.42           C  
ATOM   1115  CE1 HIS A 146      33.375   6.901  29.685  1.00 48.65           C  
ATOM   1116  NE2 HIS A 146      32.626   6.146  28.901  1.00 45.90           N  
ATOM   1117  N   PRO A 147      38.381   3.514  26.223  1.00 49.82           N  
ATOM   1118  CA  PRO A 147      39.593   3.251  25.436  1.00 49.83           C  
ATOM   1119  C   PRO A 147      39.487   3.513  23.948  1.00 48.19           C  
ATOM   1120  O   PRO A 147      40.496   3.746  23.293  1.00 49.16           O  
ATOM   1121  CB  PRO A 147      39.916   1.779  25.726  1.00 50.47           C  
ATOM   1122  CG  PRO A 147      39.034   1.388  26.872  1.00 50.78           C  
ATOM   1123  CD  PRO A 147      37.831   2.267  26.781  1.00 50.84           C  
ATOM   1124  N   TYR A 148      38.274   3.472  23.413  1.00 47.50           N  
ATOM   1125  CA  TYR A 148      38.086   3.711  21.994  1.00 48.04           C  
ATOM   1126  C   TYR A 148      37.595   5.130  21.724  1.00 45.62           C  
ATOM   1127  O   TYR A 148      37.314   5.493  20.584  1.00 45.21           O  
ATOM   1128  CB  TYR A 148      37.125   2.663  21.407  1.00 53.10           C  
ATOM   1129  CG  TYR A 148      37.820   1.351  21.065  1.00 59.41           C  
ATOM   1130  CD1 TYR A 148      38.216   0.464  22.072  1.00 62.20           C  
ATOM   1131  CD2 TYR A 148      38.129   1.022  19.741  1.00 61.34           C  
ATOM   1132  CE1 TYR A 148      38.911  -0.716  21.774  1.00 65.00           C  
ATOM   1133  CE2 TYR A 148      38.823  -0.155  19.430  1.00 65.93           C  
ATOM   1134  CZ  TYR A 148      39.214  -1.020  20.452  1.00 67.17           C  
ATOM   1135  OH  TYR A 148      39.914  -2.178  20.156  1.00 66.92           O  
ATOM   1136  N   PHE A 149      37.502   5.934  22.780  1.00 43.75           N  
ATOM   1137  CA  PHE A 149      37.071   7.327  22.654  1.00 39.95           C  
ATOM   1138  C   PHE A 149      38.265   8.094  22.087  1.00 37.47           C  
ATOM   1139  O   PHE A 149      39.348   8.064  22.660  1.00 35.76           O  
ATOM   1140  CB  PHE A 149      36.693   7.885  24.032  1.00 39.47           C  
ATOM   1141  CG  PHE A 149      35.873   9.144  23.980  1.00 37.55           C  
ATOM   1142  CD1 PHE A 149      36.489  10.388  23.931  1.00 38.01           C  
ATOM   1143  CD2 PHE A 149      34.486   9.088  24.001  1.00 37.59           C  
ATOM   1144  CE1 PHE A 149      35.732  11.565  23.905  1.00 37.15           C  
ATOM   1145  CE2 PHE A 149      33.722  10.259  23.976  1.00 38.90           C  
ATOM   1146  CZ  PHE A 149      34.349  11.501  23.928  1.00 35.70           C  
ATOM   1147  N   TYR A 150      38.069   8.767  20.960  1.00 34.82           N  
ATOM   1148  CA  TYR A 150      39.146   9.517  20.325  1.00 34.68           C  
ATOM   1149  C   TYR A 150      39.844  10.477  21.291  1.00 35.41           C  
ATOM   1150  O   TYR A 150      39.256  11.479  21.700  1.00 35.19           O  
ATOM   1151  CB  TYR A 150      38.591  10.296  19.124  1.00 33.28           C  
ATOM   1152  CG  TYR A 150      39.663  10.886  18.248  1.00 31.93           C  
ATOM   1153  CD1 TYR A 150      40.769  10.124  17.872  1.00 31.19           C  
ATOM   1154  CD2 TYR A 150      39.611  12.223  17.853  1.00 31.42           C  
ATOM   1155  CE1 TYR A 150      41.801  10.671  17.137  1.00 33.38           C  
ATOM   1156  CE2 TYR A 150      40.645  12.787  17.110  1.00 34.90           C  
ATOM   1157  CZ  TYR A 150      41.741  12.002  16.759  1.00 35.82           C  
ATOM   1158  OH  TYR A 150      42.792  12.549  16.055  1.00 39.23           O  
ATOM   1159  N   ALA A 151      41.100  10.186  21.642  1.00 34.69           N  
ATOM   1160  CA  ALA A 151      41.839  11.036  22.580  1.00 36.28           C  
ATOM   1161  C   ALA A 151      41.522  12.525  22.420  1.00 38.18           C  
ATOM   1162  O   ALA A 151      40.894  13.121  23.287  1.00 41.77           O  
ATOM   1163  CB  ALA A 151      43.360  10.785  22.472  1.00 31.76           C  
ATOM   1164  N   PRO A 152      41.965  13.154  21.327  1.00 39.34           N  
ATOM   1165  CA  PRO A 152      41.650  14.582  21.193  1.00 37.54           C  
ATOM   1166  C   PRO A 152      40.248  15.058  21.524  1.00 39.07           C  
ATOM   1167  O   PRO A 152      40.093  16.113  22.126  1.00 39.17           O  
ATOM   1168  CB  PRO A 152      42.066  14.897  19.763  1.00 35.93           C  
ATOM   1169  CG  PRO A 152      43.187  13.957  19.531  1.00 37.14           C  
ATOM   1170  CD  PRO A 152      42.861  12.688  20.251  1.00 39.03           C  
ATOM   1171  N   GLU A 153      39.234  14.278  21.165  1.00 42.44           N  
ATOM   1172  CA  GLU A 153      37.859  14.678  21.428  1.00 46.11           C  
ATOM   1173  C   GLU A 153      37.550  14.523  22.910  1.00 45.71           C  
ATOM   1174  O   GLU A 153      36.588  15.083  23.411  1.00 47.76           O  
ATOM   1175  CB  GLU A 153      36.885  13.861  20.550  1.00 50.18           C  
ATOM   1176  CG  GLU A 153      35.435  13.747  21.077  1.00 61.31           C  
ATOM   1177  CD  GLU A 153      34.460  14.809  20.527  1.00 67.27           C  
ATOM   1178  OE1 GLU A 153      34.884  15.635  19.688  1.00 70.62           O  
ATOM   1179  OE2 GLU A 153      33.268  14.816  20.935  1.00 70.24           O  
ATOM   1180  N   LEU A 154      38.397  13.779  23.605  1.00 43.89           N  
ATOM   1181  CA  LEU A 154      38.233  13.553  25.026  1.00 44.76           C  
ATOM   1182  C   LEU A 154      38.951  14.689  25.736  1.00 45.16           C  
ATOM   1183  O   LEU A 154      38.468  15.231  26.728  1.00 47.12           O  
ATOM   1184  CB  LEU A 154      38.851  12.203  25.405  1.00 45.48           C  
ATOM   1185  CG  LEU A 154      38.635  11.665  26.821  1.00 46.34           C  
ATOM   1186  CD1 LEU A 154      37.145  11.496  27.087  1.00 46.91           C  
ATOM   1187  CD2 LEU A 154      39.348  10.327  26.973  1.00 46.05           C  
ATOM   1188  N   LEU A 155      40.113  15.049  25.210  1.00 44.78           N  
ATOM   1189  CA  LEU A 155      40.898  16.124  25.782  1.00 42.99           C  
ATOM   1190  C   LEU A 155      40.113  17.413  25.610  1.00 43.79           C  
ATOM   1191  O   LEU A 155      40.270  18.351  26.391  1.00 43.57           O  
ATOM   1192  CB  LEU A 155      42.248  16.232  25.070  1.00 40.81           C  
ATOM   1193  CG  LEU A 155      43.064  17.476  25.421  1.00 40.56           C  
ATOM   1194  CD1 LEU A 155      43.283  17.508  26.930  1.00 40.92           C  
ATOM   1195  CD2 LEU A 155      44.391  17.468  24.680  1.00 36.86           C  
ATOM   1196  N   PHE A 156      39.261  17.451  24.587  1.00 44.98           N  
ATOM   1197  CA  PHE A 156      38.451  18.633  24.326  1.00 47.04           C  
ATOM   1198  C   PHE A 156      37.438  18.811  25.458  1.00 47.29           C  
ATOM   1199  O   PHE A 156      37.216  19.927  25.932  1.00 47.13           O  
ATOM   1200  CB  PHE A 156      37.722  18.515  22.982  1.00 49.54           C  
ATOM   1201  CG  PHE A 156      36.569  19.479  22.833  1.00 55.47           C  
ATOM   1202  CD1 PHE A 156      36.801  20.825  22.540  1.00 59.18           C  
ATOM   1203  CD2 PHE A 156      35.251  19.053  23.019  1.00 57.60           C  
ATOM   1204  CE1 PHE A 156      35.737  21.739  22.436  1.00 59.30           C  
ATOM   1205  CE2 PHE A 156      34.179  19.956  22.918  1.00 59.43           C  
ATOM   1206  CZ  PHE A 156      34.425  21.302  22.627  1.00 59.76           C  
ATOM   1207  N   PHE A 157      36.826  17.706  25.883  1.00 46.48           N  
ATOM   1208  CA  PHE A 157      35.856  17.732  26.973  1.00 43.88           C  
ATOM   1209  C   PHE A 157      36.572  18.083  28.274  1.00 43.92           C  
ATOM   1210  O   PHE A 157      36.047  18.834  29.094  1.00 44.48           O  
ATOM   1211  CB  PHE A 157      35.187  16.369  27.117  1.00 42.58           C  
ATOM   1212  CG  PHE A 157      34.042  16.160  26.180  1.00 43.74           C  
ATOM   1213  CD1 PHE A 157      32.820  16.783  26.407  1.00 43.49           C  
ATOM   1214  CD2 PHE A 157      34.184  15.341  25.065  1.00 44.36           C  
ATOM   1215  CE1 PHE A 157      31.749  16.594  25.535  1.00 44.35           C  
ATOM   1216  CE2 PHE A 157      33.124  15.144  24.186  1.00 44.17           C  
ATOM   1217  CZ  PHE A 157      31.900  15.774  24.424  1.00 45.31           C  
ATOM   1218  N   ALA A 158      37.774  17.537  28.450  1.00 42.86           N  
ATOM   1219  CA  ALA A 158      38.577  17.784  29.642  1.00 43.10           C  
ATOM   1220  C   ALA A 158      38.716  19.275  29.871  1.00 44.97           C  
ATOM   1221  O   ALA A 158      38.478  19.770  30.972  1.00 49.58           O  
ATOM   1222  CB  ALA A 158      39.954  17.153  29.491  1.00 38.99           C  
ATOM   1223  N   LYS A 159      39.101  19.991  28.823  1.00 45.64           N  
ATOM   1224  CA  LYS A 159      39.269  21.435  28.901  1.00 45.77           C  
ATOM   1225  C   LYS A 159      37.979  22.125  29.344  1.00 45.48           C  
ATOM   1226  O   LYS A 159      38.015  23.109  30.082  1.00 45.13           O  
ATOM   1227  CB  LYS A 159      39.697  21.974  27.537  1.00 46.66           C  
ATOM   1228  CG  LYS A 159      41.037  21.461  27.065  1.00 45.13           C  
ATOM   1229  CD  LYS A 159      41.754  22.534  26.277  1.00 47.22           C  
ATOM   1230  CE  LYS A 159      42.783  21.936  25.344  1.00 48.51           C  
ATOM   1231  NZ  LYS A 159      44.119  21.878  25.988  1.00 50.02           N  
ATOM   1232  N   ARG A 160      36.844  21.604  28.884  1.00 47.51           N  
ATOM   1233  CA  ARG A 160      35.535  22.162  29.224  1.00 50.07           C  
ATOM   1234  C   ARG A 160      35.191  21.910  30.686  1.00 50.33           C  
ATOM   1235  O   ARG A 160      34.457  22.683  31.303  1.00 50.78           O  
ATOM   1236  CB  ARG A 160      34.446  21.563  28.329  1.00 51.15           C  
ATOM   1237  CG  ARG A 160      34.022  22.490  27.202  1.00 56.28           C  
ATOM   1238  CD  ARG A 160      33.289  21.741  26.108  1.00 59.18           C  
ATOM   1239  NE  ARG A 160      31.848  21.938  26.213  1.00 63.40           N  
ATOM   1240  CZ  ARG A 160      30.941  21.093  25.735  1.00 64.46           C  
ATOM   1241  NH1 ARG A 160      31.329  19.986  25.114  1.00 64.94           N  
ATOM   1242  NH2 ARG A 160      29.648  21.354  25.883  1.00 64.60           N  
ATOM   1243  N   TYR A 161      35.718  20.822  31.235  1.00 49.58           N  
ATOM   1244  CA  TYR A 161      35.483  20.493  32.629  1.00 49.24           C  
ATOM   1245  C   TYR A 161      36.290  21.461  33.492  1.00 49.25           C  
ATOM   1246  O   TYR A 161      35.785  22.008  34.474  1.00 48.13           O  
ATOM   1247  CB  TYR A 161      35.912  19.052  32.906  1.00 48.60           C  
ATOM   1248  CG  TYR A 161      34.783  18.059  32.757  1.00 49.97           C  
ATOM   1249  CD1 TYR A 161      33.959  17.744  33.838  1.00 49.56           C  
ATOM   1250  CD2 TYR A 161      34.532  17.436  31.536  1.00 49.55           C  
ATOM   1251  CE1 TYR A 161      32.914  16.832  33.706  1.00 48.25           C  
ATOM   1252  CE2 TYR A 161      33.490  16.525  31.393  1.00 48.41           C  
ATOM   1253  CZ  TYR A 161      32.686  16.227  32.481  1.00 47.57           C  
ATOM   1254  OH  TYR A 161      31.658  15.323  32.340  1.00 46.05           O  
ATOM   1255  N   LYS A 162      37.541  21.680  33.098  1.00 49.10           N  
ATOM   1256  CA  LYS A 162      38.438  22.576  33.813  1.00 49.12           C  
ATOM   1257  C   LYS A 162      37.855  23.973  33.919  1.00 49.71           C  
ATOM   1258  O   LYS A 162      38.044  24.667  34.912  1.00 50.03           O  
ATOM   1259  CB  LYS A 162      39.779  22.644  33.095  1.00 48.52           C  
ATOM   1260  CG  LYS A 162      40.694  23.724  33.617  1.00 52.49           C  
ATOM   1261  CD  LYS A 162      42.144  23.362  33.349  1.00 56.00           C  
ATOM   1262  CE  LYS A 162      43.082  24.279  34.104  1.00 59.06           C  
ATOM   1263  NZ  LYS A 162      44.234  24.675  33.257  1.00 60.92           N  
ATOM   1264  N   ALA A 163      37.147  24.387  32.882  1.00 52.38           N  
ATOM   1265  CA  ALA A 163      36.545  25.708  32.878  1.00 56.48           C  
ATOM   1266  C   ALA A 163      35.383  25.782  33.872  1.00 58.07           C  
ATOM   1267  O   ALA A 163      35.217  26.787  34.568  1.00 60.07           O  
ATOM   1268  CB  ALA A 163      36.066  26.055  31.477  1.00 55.30           C  
ATOM   1269  N   ALA A 164      34.581  24.719  33.931  1.00 57.95           N  
ATOM   1270  CA  ALA A 164      33.437  24.658  34.839  1.00 56.58           C  
ATOM   1271  C   ALA A 164      33.905  24.816  36.278  1.00 56.63           C  
ATOM   1272  O   ALA A 164      33.248  25.463  37.093  1.00 56.09           O  
ATOM   1273  CB  ALA A 164      32.709  23.331  34.673  1.00 55.52           C  
ATOM   1274  N   PHE A 165      35.050  24.218  36.586  1.00 57.49           N  
ATOM   1275  CA  PHE A 165      35.602  24.301  37.924  1.00 58.53           C  
ATOM   1276  C   PHE A 165      36.207  25.673  38.159  1.00 59.23           C  
ATOM   1277  O   PHE A 165      35.955  26.298  39.185  1.00 60.74           O  
ATOM   1278  CB  PHE A 165      36.635  23.191  38.134  1.00 58.37           C  
ATOM   1279  CG  PHE A 165      36.013  21.842  38.344  1.00 61.52           C  
ATOM   1280  CD1 PHE A 165      35.523  21.478  39.592  1.00 63.68           C  
ATOM   1281  CD2 PHE A 165      35.844  20.966  37.278  1.00 63.13           C  
ATOM   1282  CE1 PHE A 165      34.868  20.263  39.773  1.00 65.22           C  
ATOM   1283  CE2 PHE A 165      35.190  19.746  37.447  1.00 63.49           C  
ATOM   1284  CZ  PHE A 165      34.700  19.395  38.694  1.00 64.36           C  
ATOM   1285  N   THR A 166      36.993  26.155  37.206  1.00 60.88           N  
ATOM   1286  CA  THR A 166      37.592  27.476  37.343  1.00 61.09           C  
ATOM   1287  C   THR A 166      36.493  28.508  37.627  1.00 61.71           C  
ATOM   1288  O   THR A 166      36.605  29.326  38.541  1.00 61.81           O  
ATOM   1289  CB  THR A 166      38.338  27.878  36.061  1.00 59.98           C  
ATOM   1290  OG1 THR A 166      39.490  27.043  35.897  1.00 57.34           O  
ATOM   1291  CG2 THR A 166      38.777  29.333  36.135  1.00 61.43           C  
ATOM   1292  N   GLU A 167      35.420  28.441  36.848  1.00 62.58           N  
ATOM   1293  CA  GLU A 167      34.300  29.361  36.988  1.00 64.43           C  
ATOM   1294  C   GLU A 167      33.466  29.138  38.249  1.00 66.15           C  
ATOM   1295  O   GLU A 167      33.406  30.007  39.120  1.00 68.30           O  
ATOM   1296  CB  GLU A 167      33.397  29.262  35.754  1.00 63.56           C  
ATOM   1297  CG  GLU A 167      32.093  30.028  35.858  1.00 64.79           C  
ATOM   1298  CD  GLU A 167      31.139  29.698  34.725  1.00 67.80           C  
ATOM   1299  OE1 GLU A 167      31.536  28.930  33.822  1.00 70.87           O  
ATOM   1300  OE2 GLU A 167      29.995  30.205  34.732  1.00 67.96           O  
ATOM   1301  N   CYS A 168      32.833  27.972  38.346  1.00 66.10           N  
ATOM   1302  CA  CYS A 168      31.975  27.649  39.482  1.00 65.49           C  
ATOM   1303  C   CYS A 168      32.627  27.547  40.859  1.00 64.82           C  
ATOM   1304  O   CYS A 168      32.027  27.954  41.852  1.00 64.64           O  
ATOM   1305  CB  CYS A 168      31.224  26.356  39.199  1.00 66.04           C  
ATOM   1306  SG  CYS A 168      30.020  26.507  37.850  1.00 69.45           S  
ATOM   1307  N   CYS A 169      33.837  27.002  40.931  1.00 64.62           N  
ATOM   1308  CA  CYS A 169      34.512  26.855  42.217  1.00 65.96           C  
ATOM   1309  C   CYS A 169      34.936  28.178  42.813  1.00 70.75           C  
ATOM   1310  O   CYS A 169      35.809  28.218  43.678  1.00 72.52           O  
ATOM   1311  CB  CYS A 169      35.745  25.972  42.092  1.00 59.98           C  
ATOM   1312  SG  CYS A 169      35.393  24.190  42.072  1.00 56.92           S  
ATOM   1313  N   GLN A 170      34.330  29.260  42.341  1.00 76.31           N  
ATOM   1314  CA  GLN A 170      34.643  30.590  42.845  1.00 81.12           C  
ATOM   1315  C   GLN A 170      33.359  31.407  42.949  1.00 83.27           C  
ATOM   1316  O   GLN A 170      33.386  32.634  42.891  1.00 84.49           O  
ATOM   1317  CB  GLN A 170      35.641  31.290  41.918  1.00 83.85           C  
ATOM   1318  CG  GLN A 170      37.004  30.611  41.846  1.00 89.50           C  
ATOM   1319  CD  GLN A 170      38.118  31.455  42.447  1.00 92.74           C  
ATOM   1320  OE1 GLN A 170      37.860  32.432  43.156  1.00 94.81           O  
ATOM   1321  NE2 GLN A 170      39.365  31.081  42.165  1.00 93.58           N  
ATOM   1322  N   ALA A 171      32.235  30.709  43.104  1.00 85.27           N  
ATOM   1323  CA  ALA A 171      30.922  31.340  43.227  1.00 86.26           C  
ATOM   1324  C   ALA A 171      30.288  30.973  44.573  1.00 86.88           C  
ATOM   1325  O   ALA A 171      30.341  29.817  44.997  1.00 87.40           O  
ATOM   1326  CB  ALA A 171      30.021  30.891  42.080  1.00 85.15           C  
ATOM   1327  N   ALA A 172      29.688  31.960  45.235  1.00 87.70           N  
ATOM   1328  CA  ALA A 172      29.052  31.757  46.540  1.00 87.87           C  
ATOM   1329  C   ALA A 172      28.283  30.443  46.622  1.00 86.44           C  
ATOM   1330  O   ALA A 172      28.410  29.697  47.596  1.00 86.47           O  
ATOM   1331  CB  ALA A 172      28.120  32.926  46.857  1.00 88.78           C  
ATOM   1332  N   ASP A 173      27.475  30.171  45.602  1.00 84.07           N  
ATOM   1333  CA  ASP A 173      26.712  28.933  45.559  1.00 81.86           C  
ATOM   1334  C   ASP A 173      27.253  28.054  44.431  1.00 80.27           C  
ATOM   1335  O   ASP A 173      26.633  27.922  43.371  1.00 79.63           O  
ATOM   1336  CB  ASP A 173      25.226  29.220  45.338  1.00 82.45           C  
ATOM   1337  CG  ASP A 173      24.354  28.003  45.608  1.00 83.71           C  
ATOM   1338  OD1 ASP A 173      24.866  27.017  46.183  1.00 83.22           O  
ATOM   1339  OD2 ASP A 173      23.158  28.029  45.246  1.00 83.71           O  
ATOM   1340  N   LYS A 174      28.421  27.464  44.673  1.00 77.10           N  
ATOM   1341  CA  LYS A 174      29.079  26.595  43.707  1.00 73.25           C  
ATOM   1342  C   LYS A 174      28.111  25.585  43.112  1.00 72.38           C  
ATOM   1343  O   LYS A 174      27.838  25.613  41.919  1.00 72.40           O  
ATOM   1344  CB  LYS A 174      30.237  25.855  44.374  1.00 70.54           C  
ATOM   1345  CG  LYS A 174      30.910  26.635  45.484  1.00 68.19           C  
ATOM   1346  CD  LYS A 174      32.390  26.309  45.561  1.00 68.04           C  
ATOM   1347  CE  LYS A 174      32.994  26.786  46.866  1.00 67.28           C  
ATOM   1348  NZ  LYS A 174      31.987  27.498  47.695  1.00 68.13           N  
ATOM   1349  N   ALA A 175      27.594  24.698  43.956  1.00 72.55           N  
ATOM   1350  CA  ALA A 175      26.656  23.659  43.533  1.00 72.68           C  
ATOM   1351  C   ALA A 175      25.636  24.126  42.496  1.00 72.70           C  
ATOM   1352  O   ALA A 175      25.436  23.460  41.481  1.00 73.41           O  
ATOM   1353  CB  ALA A 175      25.931  23.089  44.748  1.00 71.90           C  
ATOM   1354  N   ALA A 176      24.990  25.260  42.752  1.00 72.64           N  
ATOM   1355  CA  ALA A 176      23.987  25.801  41.833  1.00 71.90           C  
ATOM   1356  C   ALA A 176      24.613  26.152  40.483  1.00 70.58           C  
ATOM   1357  O   ALA A 176      23.928  26.274  39.464  1.00 69.20           O  
ATOM   1358  CB  ALA A 176      23.336  27.038  42.445  1.00 73.47           C  
ATOM   1359  N   CYS A 177      25.929  26.313  40.496  1.00 68.56           N  
ATOM   1360  CA  CYS A 177      26.688  26.645  39.305  1.00 67.34           C  
ATOM   1361  C   CYS A 177      27.207  25.356  38.652  1.00 66.89           C  
ATOM   1362  O   CYS A 177      26.760  24.965  37.572  1.00 66.61           O  
ATOM   1363  CB  CYS A 177      27.855  27.555  39.704  1.00 67.36           C  
ATOM   1364  SG  CYS A 177      28.917  28.135  38.349  1.00 68.39           S  
ATOM   1365  N   LEU A 178      28.136  24.699  39.345  1.00 64.85           N  
ATOM   1366  CA  LEU A 178      28.785  23.466  38.899  1.00 61.63           C  
ATOM   1367  C   LEU A 178      27.874  22.351  38.394  1.00 60.68           C  
ATOM   1368  O   LEU A 178      27.907  22.001  37.218  1.00 61.55           O  
ATOM   1369  CB  LEU A 178      29.660  22.917  40.035  1.00 60.87           C  
ATOM   1370  CG  LEU A 178      30.949  22.145  39.729  1.00 60.08           C  
ATOM   1371  CD1 LEU A 178      31.531  22.576  38.391  1.00 60.44           C  
ATOM   1372  CD2 LEU A 178      31.952  22.388  40.849  1.00 58.30           C  
ATOM   1373  N   LEU A 179      27.077  21.786  39.289  1.00 59.29           N  
ATOM   1374  CA  LEU A 179      26.185  20.688  38.944  1.00 58.98           C  
ATOM   1375  C   LEU A 179      25.535  20.742  37.568  1.00 58.87           C  
ATOM   1376  O   LEU A 179      25.621  19.789  36.798  1.00 58.45           O  
ATOM   1377  CB  LEU A 179      25.091  20.565  39.993  1.00 61.46           C  
ATOM   1378  CG  LEU A 179      25.403  19.567  41.099  1.00 64.28           C  
ATOM   1379  CD1 LEU A 179      25.713  20.313  42.389  1.00 65.34           C  
ATOM   1380  CD2 LEU A 179      24.215  18.637  41.278  1.00 66.65           C  
ATOM   1381  N   PRO A 180      24.873  21.857  37.237  1.00 58.78           N  
ATOM   1382  CA  PRO A 180      24.230  21.935  35.920  1.00 58.27           C  
ATOM   1383  C   PRO A 180      25.203  21.769  34.755  1.00 56.97           C  
ATOM   1384  O   PRO A 180      24.818  21.332  33.671  1.00 56.38           O  
ATOM   1385  CB  PRO A 180      23.563  23.313  35.918  1.00 58.84           C  
ATOM   1386  CG  PRO A 180      23.527  23.740  37.354  1.00 59.17           C  
ATOM   1387  CD  PRO A 180      24.698  23.093  38.016  1.00 58.71           C  
ATOM   1388  N   LYS A 181      26.461  22.122  34.985  1.00 55.26           N  
ATOM   1389  CA  LYS A 181      27.479  22.010  33.954  1.00 53.94           C  
ATOM   1390  C   LYS A 181      28.025  20.583  33.900  1.00 55.02           C  
ATOM   1391  O   LYS A 181      28.258  20.037  32.819  1.00 56.29           O  
ATOM   1392  CB  LYS A 181      28.603  23.007  34.231  1.00 51.51           C  
ATOM   1393  CG  LYS A 181      28.137  24.454  34.208  1.00 51.11           C  
ATOM   1394  CD  LYS A 181      29.294  25.431  34.358  1.00 51.80           C  
ATOM   1395  N   LEU A 182      28.221  19.979  35.068  1.00 54.00           N  
ATOM   1396  CA  LEU A 182      28.724  18.617  35.134  1.00 52.91           C  
ATOM   1397  C   LEU A 182      27.686  17.666  34.558  1.00 53.79           C  
ATOM   1398  O   LEU A 182      28.006  16.554  34.152  1.00 55.78           O  
ATOM   1399  CB  LEU A 182      29.018  18.227  36.579  1.00 51.91           C  
ATOM   1400  CG  LEU A 182      30.303  18.751  37.220  1.00 53.25           C  
ATOM   1401  CD1 LEU A 182      30.690  17.827  38.370  1.00 53.26           C  
ATOM   1402  CD2 LEU A 182      31.424  18.838  36.191  1.00 54.39           C  
ATOM   1403  N   ASP A 183      26.437  18.109  34.525  1.00 54.64           N  
ATOM   1404  CA  ASP A 183      25.360  17.286  33.996  1.00 56.42           C  
ATOM   1405  C   ASP A 183      25.284  17.381  32.471  1.00 55.98           C  
ATOM   1406  O   ASP A 183      25.072  16.374  31.792  1.00 55.81           O  
ATOM   1407  CB  ASP A 183      24.029  17.715  34.611  1.00 60.58           C  
ATOM   1408  CG  ASP A 183      23.780  17.078  35.972  1.00 65.11           C  
ATOM   1409  OD1 ASP A 183      24.746  16.910  36.751  1.00 66.99           O  
ATOM   1410  OD2 ASP A 183      22.609  16.747  36.261  1.00 66.65           O  
ATOM   1411  N   GLU A 184      25.456  18.592  31.939  1.00 55.09           N  
ATOM   1412  CA  GLU A 184      25.410  18.825  30.492  1.00 51.69           C  
ATOM   1413  C   GLU A 184      26.587  18.144  29.804  1.00 50.04           C  
ATOM   1414  O   GLU A 184      26.408  17.417  28.828  1.00 50.02           O  
ATOM   1415  CB  GLU A 184      25.441  20.327  30.186  1.00 49.95           C  
ATOM   1416  N   LEU A 185      27.788  18.385  30.324  1.00 48.15           N  
ATOM   1417  CA  LEU A 185      29.004  17.799  29.774  1.00 47.42           C  
ATOM   1418  C   LEU A 185      28.923  16.280  29.768  1.00 48.38           C  
ATOM   1419  O   LEU A 185      29.283  15.632  28.784  1.00 48.10           O  
ATOM   1420  CB  LEU A 185      30.222  18.243  30.588  1.00 44.35           C  
ATOM   1421  CG  LEU A 185      30.965  19.474  30.071  1.00 43.71           C  
ATOM   1422  CD1 LEU A 185      29.974  20.481  29.502  1.00 44.27           C  
ATOM   1423  CD2 LEU A 185      31.762  20.089  31.204  1.00 43.15           C  
ATOM   1424  N   ARG A 186      28.450  15.712  30.871  1.00 49.88           N  
ATOM   1425  CA  ARG A 186      28.329  14.264  30.979  1.00 51.63           C  
ATOM   1426  C   ARG A 186      27.421  13.730  29.881  1.00 51.11           C  
ATOM   1427  O   ARG A 186      27.748  12.755  29.208  1.00 51.99           O  
ATOM   1428  CB  ARG A 186      27.775  13.876  32.354  1.00 53.02           C  
ATOM   1429  CG  ARG A 186      27.380  12.410  32.487  1.00 53.89           C  
ATOM   1430  CD  ARG A 186      26.335  12.214  33.582  1.00 55.95           C  
ATOM   1431  NE  ARG A 186      24.978  12.095  33.047  1.00 56.49           N  
ATOM   1432  N   ASP A 187      26.281  14.374  29.696  1.00 51.70           N  
ATOM   1433  CA  ASP A 187      25.352  13.938  28.674  1.00 54.36           C  
ATOM   1434  C   ASP A 187      25.956  14.082  27.290  1.00 54.72           C  
ATOM   1435  O   ASP A 187      25.712  13.256  26.417  1.00 55.63           O  
ATOM   1436  CB  ASP A 187      24.063  14.742  28.766  1.00 58.17           C  
ATOM   1437  CG  ASP A 187      23.095  14.146  29.751  1.00 61.88           C  
ATOM   1438  OD1 ASP A 187      22.972  12.900  29.773  1.00 64.35           O  
ATOM   1439  OD2 ASP A 187      22.467  14.917  30.504  1.00 64.33           O  
ATOM   1440  N   GLU A 188      26.744  15.133  27.093  1.00 54.35           N  
ATOM   1441  CA  GLU A 188      27.390  15.375  25.808  1.00 53.23           C  
ATOM   1442  C   GLU A 188      28.477  14.343  25.563  1.00 51.84           C  
ATOM   1443  O   GLU A 188      28.619  13.828  24.456  1.00 51.55           O  
ATOM   1444  CB  GLU A 188      28.004  16.770  25.778  1.00 55.45           C  
ATOM   1445  CG  GLU A 188      27.048  17.841  25.298  1.00 59.29           C  
ATOM   1446  CD  GLU A 188      27.719  19.191  25.131  1.00 61.79           C  
ATOM   1447  OE1 GLU A 188      28.895  19.230  24.705  1.00 62.19           O  
ATOM   1448  OE2 GLU A 188      27.063  20.213  25.425  1.00 63.44           O  
ATOM   1449  N   GLY A 189      29.247  14.051  26.605  1.00 51.04           N  
ATOM   1450  CA  GLY A 189      30.306  13.068  26.483  1.00 49.11           C  
ATOM   1451  C   GLY A 189      29.688  11.722  26.181  1.00 47.72           C  
ATOM   1452  O   GLY A 189      30.204  10.954  25.379  1.00 47.98           O  
ATOM   1453  N   LYS A 190      28.564  11.444  26.827  1.00 47.20           N  
ATOM   1454  CA  LYS A 190      27.857  10.189  26.627  1.00 47.03           C  
ATOM   1455  C   LYS A 190      27.226  10.144  25.237  1.00 45.26           C  
ATOM   1456  O   LYS A 190      27.138   9.083  24.618  1.00 45.00           O  
ATOM   1457  CB  LYS A 190      26.776  10.026  27.695  1.00 49.10           C  
ATOM   1458  CG  LYS A 190      27.301   9.525  29.029  1.00 50.56           C  
ATOM   1459  CD  LYS A 190      26.354   8.509  29.629  1.00 53.25           C  
ATOM   1460  CE  LYS A 190      24.958   9.092  29.782  1.00 56.14           C  
ATOM   1461  NZ  LYS A 190      24.580   9.215  31.218  1.00 61.04           N  
ATOM   1462  N   ALA A 191      26.778  11.297  24.751  1.00 43.56           N  
ATOM   1463  CA  ALA A 191      26.178  11.366  23.425  1.00 41.94           C  
ATOM   1464  C   ALA A 191      27.307  11.115  22.437  1.00 43.16           C  
ATOM   1465  O   ALA A 191      27.217  10.234  21.586  1.00 42.12           O  
ATOM   1466  CB  ALA A 191      25.568  12.741  23.186  1.00 38.19           C  
ATOM   1467  N   SER A 192      28.380  11.887  22.582  1.00 43.54           N  
ATOM   1468  CA  SER A 192      29.545  11.771  21.716  1.00 44.20           C  
ATOM   1469  C   SER A 192      30.028  10.325  21.610  1.00 44.74           C  
ATOM   1470  O   SER A 192      30.235   9.805  20.514  1.00 47.09           O  
ATOM   1471  CB  SER A 192      30.672  12.657  22.248  1.00 42.97           C  
ATOM   1472  OG  SER A 192      31.936  12.139  21.878  1.00 45.57           O  
ATOM   1473  N   SER A 193      30.197   9.680  22.755  1.00 45.03           N  
ATOM   1474  CA  SER A 193      30.657   8.302  22.803  1.00 45.04           C  
ATOM   1475  C   SER A 193      29.735   7.341  22.056  1.00 45.65           C  
ATOM   1476  O   SER A 193      30.197   6.506  21.290  1.00 47.68           O  
ATOM   1477  CB  SER A 193      30.791   7.855  24.257  1.00 45.12           C  
ATOM   1478  OG  SER A 193      31.332   6.551  24.337  1.00 50.65           O  
ATOM   1479  N   ALA A 194      28.432   7.453  22.275  1.00 46.10           N  
ATOM   1480  CA  ALA A 194      27.483   6.565  21.612  1.00 45.64           C  
ATOM   1481  C   ALA A 194      27.503   6.753  20.101  1.00 45.97           C  
ATOM   1482  O   ALA A 194      27.319   5.801  19.344  1.00 46.55           O  
ATOM   1483  CB  ALA A 194      26.083   6.809  22.147  1.00 45.13           C  
ATOM   1484  N   LYS A 195      27.718   7.993  19.674  1.00 45.42           N  
ATOM   1485  CA  LYS A 195      27.767   8.325  18.259  1.00 44.50           C  
ATOM   1486  C   LYS A 195      28.943   7.610  17.614  1.00 44.96           C  
ATOM   1487  O   LYS A 195      28.790   6.949  16.594  1.00 45.94           O  
ATOM   1488  CB  LYS A 195      27.936   9.831  18.074  1.00 42.34           C  
ATOM   1489  CG  LYS A 195      26.647  10.614  18.028  1.00 40.74           C  
ATOM   1490  CD  LYS A 195      26.937  12.093  18.244  1.00 44.81           C  
ATOM   1491  CE  LYS A 195      25.833  12.983  17.690  1.00 45.80           C  
ATOM   1492  N   GLN A 196      30.119   7.752  18.213  1.00 45.05           N  
ATOM   1493  CA  GLN A 196      31.318   7.114  17.691  1.00 47.77           C  
ATOM   1494  C   GLN A 196      31.124   5.601  17.577  1.00 48.57           C  
ATOM   1495  O   GLN A 196      31.367   5.018  16.517  1.00 49.86           O  
ATOM   1496  CB  GLN A 196      32.519   7.416  18.597  1.00 51.38           C  
ATOM   1497  CG  GLN A 196      32.847   8.908  18.742  1.00 56.20           C  
ATOM   1498  CD  GLN A 196      34.104   9.178  19.575  1.00 57.59           C  
ATOM   1499  OE1 GLN A 196      35.196   8.677  19.271  1.00 58.35           O  
ATOM   1500  NE2 GLN A 196      33.952   9.980  20.626  1.00 56.10           N  
ATOM   1501  N   ARG A 197      30.682   4.974  18.668  1.00 47.42           N  
ATOM   1502  CA  ARG A 197      30.457   3.528  18.701  1.00 44.51           C  
ATOM   1503  C   ARG A 197      29.422   3.143  17.657  1.00 42.62           C  
ATOM   1504  O   ARG A 197      29.482   2.069  17.067  1.00 42.37           O  
ATOM   1505  CB  ARG A 197      29.970   3.093  20.090  1.00 42.01           C  
ATOM   1506  N   LEU A 198      28.490   4.053  17.418  1.00 41.78           N  
ATOM   1507  CA  LEU A 198      27.409   3.836  16.474  1.00 42.05           C  
ATOM   1508  C   LEU A 198      27.804   3.849  14.994  1.00 43.60           C  
ATOM   1509  O   LEU A 198      27.110   3.262  14.163  1.00 45.17           O  
ATOM   1510  CB  LEU A 198      26.311   4.870  16.735  1.00 41.17           C  
ATOM   1511  CG  LEU A 198      25.219   5.011  15.677  1.00 43.09           C  
ATOM   1512  CD1 LEU A 198      24.499   3.679  15.457  1.00 42.73           C  
ATOM   1513  CD2 LEU A 198      24.247   6.075  16.128  1.00 44.79           C  
ATOM   1514  N   LYS A 199      28.909   4.503  14.651  1.00 42.83           N  
ATOM   1515  CA  LYS A 199      29.319   4.550  13.255  1.00 43.26           C  
ATOM   1516  C   LYS A 199      30.191   3.374  12.914  1.00 43.34           C  
ATOM   1517  O   LYS A 199      30.188   2.890  11.782  1.00 44.25           O  
ATOM   1518  CB  LYS A 199      30.078   5.828  12.962  1.00 45.80           C  
ATOM   1519  CG  LYS A 199      29.406   7.042  13.518  1.00 50.14           C  
ATOM   1520  CD  LYS A 199      30.003   8.277  12.914  1.00 54.08           C  
ATOM   1521  CE  LYS A 199      28.924   9.182  12.376  1.00 57.29           C  
ATOM   1522  NZ  LYS A 199      29.524  10.445  11.870  1.00 59.46           N  
ATOM   1523  N   CYS A 200      30.955   2.930  13.900  1.00 42.67           N  
ATOM   1524  CA  CYS A 200      31.822   1.794  13.707  1.00 42.35           C  
ATOM   1525  C   CYS A 200      30.909   0.589  13.612  1.00 42.93           C  
ATOM   1526  O   CYS A 200      31.259  -0.416  13.005  1.00 45.11           O  
ATOM   1527  CB  CYS A 200      32.792   1.695  14.875  1.00 40.31           C  
ATOM   1528  SG  CYS A 200      33.880   3.157  14.892  1.00 38.86           S  
ATOM   1529  N   ALA A 201      29.720   0.710  14.191  1.00 42.83           N  
ATOM   1530  CA  ALA A 201      28.749  -0.368  14.131  1.00 43.23           C  
ATOM   1531  C   ALA A 201      28.201  -0.409  12.714  1.00 44.27           C  
ATOM   1532  O   ALA A 201      28.256  -1.441  12.052  1.00 43.42           O  
ATOM   1533  CB  ALA A 201      27.623  -0.118  15.112  1.00 43.93           C  
ATOM   1534  N   SER A 202      27.673   0.725  12.259  1.00 46.43           N  
ATOM   1535  CA  SER A 202      27.113   0.849  10.914  1.00 49.06           C  
ATOM   1536  C   SER A 202      28.099   0.364   9.866  1.00 49.39           C  
ATOM   1537  O   SER A 202      27.777  -0.492   9.046  1.00 50.52           O  
ATOM   1538  CB  SER A 202      26.761   2.306  10.623  1.00 51.39           C  
ATOM   1539  OG  SER A 202      25.777   2.776  11.528  1.00 56.78           O  
ATOM   1540  N   LEU A 203      29.301   0.929   9.892  1.00 49.98           N  
ATOM   1541  CA  LEU A 203      30.348   0.553   8.958  1.00 51.25           C  
ATOM   1542  C   LEU A 203      30.508  -0.963   8.946  1.00 52.76           C  
ATOM   1543  O   LEU A 203      30.460  -1.590   7.892  1.00 52.97           O  
ATOM   1544  CB  LEU A 203      31.669   1.208   9.363  1.00 50.94           C  
ATOM   1545  CG  LEU A 203      32.657   1.554   8.248  1.00 53.61           C  
ATOM   1546  CD1 LEU A 203      33.480   2.761   8.661  1.00 56.26           C  
ATOM   1547  CD2 LEU A 203      33.566   0.373   7.974  1.00 54.37           C  
ATOM   1548  N   GLN A 204      30.688  -1.545  10.129  1.00 56.10           N  
ATOM   1549  CA  GLN A 204      30.862  -2.992  10.272  1.00 58.14           C  
ATOM   1550  C   GLN A 204      29.665  -3.794   9.761  1.00 58.89           C  
ATOM   1551  O   GLN A 204      29.818  -4.690   8.932  1.00 61.32           O  
ATOM   1552  CB  GLN A 204      31.123  -3.353  11.740  1.00 56.96           C  
ATOM   1553  N   LYS A 205      28.475  -3.470  10.251  1.00 58.59           N  
ATOM   1554  CA  LYS A 205      27.273  -4.182   9.847  1.00 60.00           C  
ATOM   1555  C   LYS A 205      26.934  -4.043   8.371  1.00 61.04           C  
ATOM   1556  O   LYS A 205      26.960  -5.021   7.626  1.00 62.58           O  
ATOM   1557  CB  LYS A 205      26.075  -3.714  10.676  1.00 60.97           C  
ATOM   1558  CG  LYS A 205      26.258  -3.874  12.176  1.00 63.61           C  
ATOM   1559  CD  LYS A 205      25.071  -4.584  12.812  1.00 66.44           C  
ATOM   1560  CE  LYS A 205      24.194  -3.619  13.609  1.00 68.93           C  
ATOM   1561  NZ  LYS A 205      22.793  -3.537  13.069  1.00 69.27           N  
ATOM   1562  N   PHE A 206      26.630  -2.819   7.950  1.00 61.73           N  
ATOM   1563  CA  PHE A 206      26.227  -2.555   6.572  1.00 60.64           C  
ATOM   1564  C   PHE A 206      27.291  -2.213   5.536  1.00 58.91           C  
ATOM   1565  O   PHE A 206      26.975  -1.683   4.478  1.00 61.60           O  
ATOM   1566  CB  PHE A 206      25.160  -1.468   6.575  1.00 62.40           C  
ATOM   1567  CG  PHE A 206      24.118  -1.665   7.622  1.00 64.72           C  
ATOM   1568  CD1 PHE A 206      24.354  -1.269   8.934  1.00 65.76           C  
ATOM   1569  CD2 PHE A 206      22.908  -2.273   7.307  1.00 66.65           C  
ATOM   1570  CE1 PHE A 206      23.400  -1.477   9.920  1.00 68.41           C  
ATOM   1571  CE2 PHE A 206      21.946  -2.486   8.283  1.00 67.87           C  
ATOM   1572  CZ  PHE A 206      22.191  -2.087   9.596  1.00 69.35           C  
ATOM   1573  N   GLY A 207      28.547  -2.510   5.824  1.00 57.48           N  
ATOM   1574  CA  GLY A 207      29.588  -2.232   4.850  1.00 55.33           C  
ATOM   1575  C   GLY A 207      29.741  -0.806   4.350  1.00 52.67           C  
ATOM   1576  O   GLY A 207      28.957   0.090   4.681  1.00 49.92           O  
ATOM   1577  N   GLU A 208      30.773  -0.626   3.530  1.00 52.31           N  
ATOM   1578  CA  GLU A 208      31.156   0.653   2.933  1.00 51.77           C  
ATOM   1579  C   GLU A 208      30.107   1.342   2.057  1.00 49.58           C  
ATOM   1580  O   GLU A 208      29.939   2.555   2.137  1.00 50.06           O  
ATOM   1581  CB  GLU A 208      32.435   0.460   2.111  1.00 53.40           C  
ATOM   1582  CG  GLU A 208      33.476   1.554   2.260  1.00 58.28           C  
ATOM   1583  CD  GLU A 208      34.707   1.302   1.399  1.00 61.27           C  
ATOM   1584  OE1 GLU A 208      34.667   0.367   0.570  1.00 60.41           O  
ATOM   1585  OE2 GLU A 208      35.714   2.035   1.549  1.00 64.12           O  
ATOM   1586  N   ARG A 209      29.408   0.583   1.218  1.00 46.30           N  
ATOM   1587  CA  ARG A 209      28.418   1.183   0.333  1.00 42.47           C  
ATOM   1588  C   ARG A 209      27.403   2.044   1.067  1.00 40.39           C  
ATOM   1589  O   ARG A 209      27.222   3.214   0.734  1.00 38.43           O  
ATOM   1590  CB  ARG A 209      27.693   0.106  -0.476  1.00 43.37           C  
ATOM   1591  CG  ARG A 209      27.230   0.577  -1.857  1.00 40.40           C  
ATOM   1592  CD  ARG A 209      25.831   0.069  -2.137  1.00 44.46           C  
ATOM   1593  NE  ARG A 209      25.259   0.557  -3.389  1.00 42.75           N  
ATOM   1594  CZ  ARG A 209      23.953   0.571  -3.652  1.00 45.18           C  
ATOM   1595  NH1 ARG A 209      23.084   0.120  -2.750  1.00 44.96           N  
ATOM   1596  NH2 ARG A 209      23.509   1.025  -4.818  1.00 42.90           N  
ATOM   1597  N   ALA A 210      26.732   1.471   2.060  1.00 38.93           N  
ATOM   1598  CA  ALA A 210      25.742   2.229   2.818  1.00 37.32           C  
ATOM   1599  C   ALA A 210      26.420   3.386   3.549  1.00 35.38           C  
ATOM   1600  O   ALA A 210      25.891   4.499   3.603  1.00 34.85           O  
ATOM   1601  CB  ALA A 210      25.032   1.325   3.810  1.00 39.63           C  
ATOM   1602  N   PHE A 211      27.591   3.127   4.113  1.00 31.43           N  
ATOM   1603  CA  PHE A 211      28.309   4.174   4.808  1.00 31.79           C  
ATOM   1604  C   PHE A 211      28.568   5.343   3.851  1.00 33.67           C  
ATOM   1605  O   PHE A 211      28.275   6.499   4.172  1.00 33.26           O  
ATOM   1606  CB  PHE A 211      29.625   3.630   5.334  1.00 32.23           C  
ATOM   1607  CG  PHE A 211      30.300   4.535   6.307  1.00 37.13           C  
ATOM   1608  CD1 PHE A 211      29.923   4.539   7.645  1.00 40.25           C  
ATOM   1609  CD2 PHE A 211      31.329   5.377   5.895  1.00 39.88           C  
ATOM   1610  CE1 PHE A 211      30.563   5.367   8.563  1.00 43.21           C  
ATOM   1611  CE2 PHE A 211      31.979   6.213   6.803  1.00 41.89           C  
ATOM   1612  CZ  PHE A 211      31.596   6.207   8.141  1.00 44.54           C  
ATOM   1613  N   LYS A 212      29.106   5.033   2.671  1.00 34.18           N  
ATOM   1614  CA  LYS A 212      29.408   6.051   1.665  1.00 31.44           C  
ATOM   1615  C   LYS A 212      28.145   6.782   1.262  1.00 29.34           C  
ATOM   1616  O   LYS A 212      28.144   8.005   1.132  1.00 30.15           O  
ATOM   1617  CB  LYS A 212      30.057   5.419   0.436  1.00 33.95           C  
ATOM   1618  CG  LYS A 212      31.533   5.111   0.626  1.00 37.80           C  
ATOM   1619  CD  LYS A 212      32.166   4.599  -0.660  1.00 43.71           C  
ATOM   1620  CE  LYS A 212      33.690   4.692  -0.594  1.00 47.55           C  
ATOM   1621  NZ  LYS A 212      34.360   3.403  -0.928  1.00 50.81           N  
ATOM   1622  N   ALA A 213      27.067   6.032   1.061  1.00 26.68           N  
ATOM   1623  CA  ALA A 213      25.795   6.639   0.706  1.00 29.81           C  
ATOM   1624  C   ALA A 213      25.442   7.640   1.802  1.00 33.45           C  
ATOM   1625  O   ALA A 213      25.070   8.782   1.522  1.00 35.70           O  
ATOM   1626  CB  ALA A 213      24.704   5.574   0.579  1.00 25.29           C  
ATOM   1627  N   TRP A 214      25.574   7.207   3.052  1.00 35.73           N  
ATOM   1628  CA  TRP A 214      25.263   8.057   4.187  1.00 32.35           C  
ATOM   1629  C   TRP A 214      26.113   9.311   4.177  1.00 30.37           C  
ATOM   1630  O   TRP A 214      25.590  10.412   4.320  1.00 28.04           O  
ATOM   1631  CB  TRP A 214      25.509   7.291   5.489  1.00 37.08           C  
ATOM   1632  CG  TRP A 214      24.840   7.882   6.658  1.00 39.30           C  
ATOM   1633  CD1 TRP A 214      23.533   7.750   6.980  1.00 39.76           C  
ATOM   1634  CD2 TRP A 214      25.374   8.893   7.526  1.00 41.53           C  
ATOM   1635  NE1 TRP A 214      23.209   8.600   8.000  1.00 43.97           N  
ATOM   1636  CE2 TRP A 214      24.321   9.306   8.366  1.00 43.77           C  
ATOM   1637  CE3 TRP A 214      26.649   9.457   7.696  1.00 42.71           C  
ATOM   1638  CZ2 TRP A 214      24.489  10.286   9.357  1.00 45.14           C  
ATOM   1639  CZ3 TRP A 214      26.819  10.438   8.685  1.00 43.49           C  
ATOM   1640  CH2 TRP A 214      25.743  10.828   9.508  1.00 45.52           C  
ATOM   1641  N   ALA A 215      27.423   9.143   4.018  1.00 27.86           N  
ATOM   1642  CA  ALA A 215      28.344  10.276   3.992  1.00 26.95           C  
ATOM   1643  C   ALA A 215      28.065  11.253   2.850  1.00 28.83           C  
ATOM   1644  O   ALA A 215      28.199  12.470   3.011  1.00 28.73           O  
ATOM   1645  CB  ALA A 215      29.775   9.771   3.893  1.00 26.83           C  
ATOM   1646  N   VAL A 216      27.680  10.726   1.693  1.00 27.33           N  
ATOM   1647  CA  VAL A 216      27.396  11.587   0.561  1.00 28.21           C  
ATOM   1648  C   VAL A 216      26.297  12.566   0.934  1.00 29.17           C  
ATOM   1649  O   VAL A 216      26.483  13.774   0.836  1.00 32.04           O  
ATOM   1650  CB  VAL A 216      26.957  10.779  -0.679  1.00 25.92           C  
ATOM   1651  CG1 VAL A 216      26.259  11.680  -1.664  1.00 23.76           C  
ATOM   1652  CG2 VAL A 216      28.160  10.155  -1.330  1.00 28.24           C  
ATOM   1653  N   ALA A 217      25.156  12.042   1.371  1.00 30.68           N  
ATOM   1654  CA  ALA A 217      24.024  12.879   1.761  1.00 32.48           C  
ATOM   1655  C   ALA A 217      24.396  13.910   2.844  1.00 34.17           C  
ATOM   1656  O   ALA A 217      24.009  15.078   2.761  1.00 34.16           O  
ATOM   1657  CB  ALA A 217      22.874  11.993   2.238  1.00 28.79           C  
ATOM   1658  N   ARG A 218      25.156  13.477   3.847  1.00 36.39           N  
ATOM   1659  CA  ARG A 218      25.574  14.357   4.939  1.00 38.96           C  
ATOM   1660  C   ARG A 218      26.549  15.441   4.490  1.00 37.62           C  
ATOM   1661  O   ARG A 218      26.404  16.602   4.865  1.00 37.05           O  
ATOM   1662  CB  ARG A 218      26.216  13.541   6.067  1.00 42.99           C  
ATOM   1663  CG  ARG A 218      26.449  14.327   7.343  1.00 51.33           C  
ATOM   1664  CD  ARG A 218      25.141  14.845   7.913  1.00 61.80           C  
ATOM   1665  NE  ARG A 218      25.081  14.711   9.365  1.00 72.38           N  
ATOM   1666  CZ  ARG A 218      24.022  15.040  10.101  1.00 77.73           C  
ATOM   1667  NH1 ARG A 218      22.930  15.526   9.519  1.00 80.91           N  
ATOM   1668  NH2 ARG A 218      24.051  14.879  11.419  1.00 81.16           N  
ATOM   1669  N   LEU A 219      27.548  15.056   3.699  1.00 37.48           N  
ATOM   1670  CA  LEU A 219      28.541  16.001   3.203  1.00 34.20           C  
ATOM   1671  C   LEU A 219      27.914  17.019   2.247  1.00 33.06           C  
ATOM   1672  O   LEU A 219      28.307  18.179   2.230  1.00 34.39           O  
ATOM   1673  CB  LEU A 219      29.666  15.245   2.501  1.00 34.58           C  
ATOM   1674  CG  LEU A 219      30.751  14.664   3.417  1.00 35.93           C  
ATOM   1675  CD1 LEU A 219      31.812  13.916   2.591  1.00 33.24           C  
ATOM   1676  CD2 LEU A 219      31.388  15.782   4.209  1.00 32.56           C  
ATOM   1677  N   SER A 220      26.932  16.583   1.463  1.00 31.32           N  
ATOM   1678  CA  SER A 220      26.251  17.460   0.509  1.00 32.98           C  
ATOM   1679  C   SER A 220      25.365  18.499   1.196  1.00 35.92           C  
ATOM   1680  O   SER A 220      25.287  19.649   0.757  1.00 37.29           O  
ATOM   1681  CB  SER A 220      25.392  16.637  -0.457  1.00 31.04           C  
ATOM   1682  OG  SER A 220      26.153  15.618  -1.079  1.00 27.70           O  
ATOM   1683  N   GLN A 221      24.676  18.087   2.257  1.00 37.70           N  
ATOM   1684  CA  GLN A 221      23.814  18.998   2.998  1.00 36.13           C  
ATOM   1685  C   GLN A 221      24.662  20.138   3.549  1.00 37.33           C  
ATOM   1686  O   GLN A 221      24.247  21.295   3.526  1.00 40.29           O  
ATOM   1687  CB  GLN A 221      23.144  18.268   4.159  1.00 33.49           C  
ATOM   1688  CG  GLN A 221      21.793  17.688   3.822  1.00 32.07           C  
ATOM   1689  CD  GLN A 221      21.192  16.884   4.966  1.00 27.56           C  
ATOM   1690  OE1 GLN A 221      21.908  16.327   5.797  1.00 24.12           O  
ATOM   1691  NE2 GLN A 221      19.868  16.818   5.004  1.00 24.39           N  
ATOM   1692  N   ARG A 222      25.859  19.798   4.020  1.00 36.76           N  
ATOM   1693  CA  ARG A 222      26.782  20.765   4.609  1.00 40.27           C  
ATOM   1694  C   ARG A 222      27.569  21.614   3.621  1.00 40.14           C  
ATOM   1695  O   ARG A 222      27.786  22.804   3.846  1.00 40.15           O  
ATOM   1696  CB  ARG A 222      27.759  20.039   5.534  1.00 44.18           C  
ATOM   1697  CG  ARG A 222      27.132  19.657   6.855  1.00 54.23           C  
ATOM   1698  CD  ARG A 222      28.155  19.238   7.883  1.00 61.41           C  
ATOM   1699  NE  ARG A 222      27.508  18.650   9.052  1.00 65.64           N  
ATOM   1700  CZ  ARG A 222      28.156  18.296  10.153  1.00 69.57           C  
ATOM   1701  NH1 ARG A 222      29.466  18.477  10.231  1.00 71.89           N  
ATOM   1702  NH2 ARG A 222      27.495  17.759  11.170  1.00 73.57           N  
ATOM   1703  N   PHE A 223      28.009  20.998   2.534  1.00 40.34           N  
ATOM   1704  CA  PHE A 223      28.776  21.703   1.518  1.00 38.84           C  
ATOM   1705  C   PHE A 223      27.984  21.717   0.218  1.00 38.44           C  
ATOM   1706  O   PHE A 223      28.422  21.180  -0.802  1.00 38.17           O  
ATOM   1707  CB  PHE A 223      30.111  20.997   1.311  1.00 39.46           C  
ATOM   1708  CG  PHE A 223      30.873  20.760   2.582  1.00 38.75           C  
ATOM   1709  CD1 PHE A 223      30.891  21.724   3.589  1.00 37.62           C  
ATOM   1710  CD2 PHE A 223      31.611  19.591   2.757  1.00 37.80           C  
ATOM   1711  CE1 PHE A 223      31.636  21.529   4.748  1.00 36.82           C  
ATOM   1712  CE2 PHE A 223      32.360  19.383   3.911  1.00 37.18           C  
ATOM   1713  CZ  PHE A 223      32.375  20.353   4.909  1.00 37.70           C  
ATOM   1714  N   PRO A 224      26.813  22.359   0.229  1.00 37.04           N  
ATOM   1715  CA  PRO A 224      26.020  22.384  -0.998  1.00 39.36           C  
ATOM   1716  C   PRO A 224      26.765  23.027  -2.169  1.00 41.71           C  
ATOM   1717  O   PRO A 224      26.628  22.592  -3.308  1.00 42.14           O  
ATOM   1718  CB  PRO A 224      24.751  23.143  -0.594  1.00 37.51           C  
ATOM   1719  CG  PRO A 224      25.134  23.919   0.614  1.00 36.06           C  
ATOM   1720  CD  PRO A 224      26.187  23.124   1.319  1.00 36.39           C  
ATOM   1721  N   LYS A 225      27.567  24.049  -1.888  1.00 44.78           N  
ATOM   1722  CA  LYS A 225      28.316  24.722  -2.945  1.00 48.15           C  
ATOM   1723  C   LYS A 225      29.394  23.820  -3.523  1.00 48.69           C  
ATOM   1724  O   LYS A 225      29.828  24.020  -4.655  1.00 50.68           O  
ATOM   1725  CB  LYS A 225      28.965  26.007  -2.426  1.00 50.65           C  
ATOM   1726  CG  LYS A 225      28.081  27.239  -2.551  1.00 56.81           C  
ATOM   1727  CD  LYS A 225      27.817  27.864  -1.186  1.00 62.22           C  
ATOM   1728  CE  LYS A 225      27.692  29.377  -1.276  1.00 64.34           C  
ATOM   1729  NZ  LYS A 225      28.710  30.061  -0.422  1.00 66.55           N  
ATOM   1730  N   ALA A 226      29.839  22.837  -2.748  1.00 48.62           N  
ATOM   1731  CA  ALA A 226      30.861  21.917  -3.230  1.00 47.21           C  
ATOM   1732  C   ALA A 226      30.319  21.235  -4.493  1.00 48.26           C  
ATOM   1733  O   ALA A 226      29.135  21.360  -4.812  1.00 49.52           O  
ATOM   1734  CB  ALA A 226      31.179  20.882  -2.160  1.00 44.84           C  
ATOM   1735  N   GLU A 227      31.183  20.526  -5.215  1.00 47.37           N  
ATOM   1736  CA  GLU A 227      30.771  19.833  -6.437  1.00 45.61           C  
ATOM   1737  C   GLU A 227      30.944  18.329  -6.260  1.00 44.10           C  
ATOM   1738  O   GLU A 227      31.841  17.884  -5.546  1.00 44.61           O  
ATOM   1739  CB  GLU A 227      31.604  20.320  -7.626  1.00 43.48           C  
ATOM   1740  N   PHE A 228      30.102  17.542  -6.917  1.00 42.30           N  
ATOM   1741  CA  PHE A 228      30.190  16.094  -6.770  1.00 42.70           C  
ATOM   1742  C   PHE A 228      31.590  15.482  -6.745  1.00 42.97           C  
ATOM   1743  O   PHE A 228      31.855  14.576  -5.959  1.00 44.31           O  
ATOM   1744  CB  PHE A 228      29.376  15.390  -7.842  1.00 40.81           C  
ATOM   1745  CG  PHE A 228      29.221  13.934  -7.585  1.00 42.02           C  
ATOM   1746  CD1 PHE A 228      28.360  13.488  -6.594  1.00 42.93           C  
ATOM   1747  CD2 PHE A 228      29.972  13.004  -8.289  1.00 42.12           C  
ATOM   1748  CE1 PHE A 228      28.255  12.131  -6.298  1.00 44.15           C  
ATOM   1749  CE2 PHE A 228      29.874  11.643  -8.001  1.00 43.91           C  
ATOM   1750  CZ  PHE A 228      29.013  11.206  -7.004  1.00 44.31           C  
ATOM   1751  N   ALA A 229      32.484  15.965  -7.600  1.00 44.89           N  
ATOM   1752  CA  ALA A 229      33.849  15.437  -7.655  1.00 46.00           C  
ATOM   1753  C   ALA A 229      34.562  15.643  -6.329  1.00 45.88           C  
ATOM   1754  O   ALA A 229      35.355  14.802  -5.904  1.00 44.77           O  
ATOM   1755  CB  ALA A 229      34.630  16.113  -8.771  1.00 47.30           C  
ATOM   1756  N   GLU A 230      34.283  16.779  -5.693  1.00 47.01           N  
ATOM   1757  CA  GLU A 230      34.867  17.119  -4.396  1.00 46.61           C  
ATOM   1758  C   GLU A 230      34.199  16.272  -3.306  1.00 45.40           C  
ATOM   1759  O   GLU A 230      34.871  15.703  -2.439  1.00 42.60           O  
ATOM   1760  CB  GLU A 230      34.654  18.606  -4.100  1.00 46.83           C  
ATOM   1761  CG  GLU A 230      35.792  19.268  -3.338  1.00 51.84           C  
ATOM   1762  CD  GLU A 230      37.159  19.031  -3.967  1.00 56.09           C  
ATOM   1763  OE1 GLU A 230      37.380  19.441  -5.131  1.00 58.23           O  
ATOM   1764  OE2 GLU A 230      38.019  18.435  -3.287  1.00 56.75           O  
ATOM   1765  N   VAL A 231      32.872  16.187  -3.362  1.00 43.01           N  
ATOM   1766  CA  VAL A 231      32.137  15.403  -2.388  1.00 41.73           C  
ATOM   1767  C   VAL A 231      32.662  13.977  -2.376  1.00 43.00           C  
ATOM   1768  O   VAL A 231      33.072  13.486  -1.330  1.00 44.70           O  
ATOM   1769  CB  VAL A 231      30.637  15.385  -2.693  1.00 39.79           C  
ATOM   1770  CG1 VAL A 231      29.933  14.428  -1.741  1.00 38.73           C  
ATOM   1771  CG2 VAL A 231      30.068  16.787  -2.559  1.00 33.86           C  
ATOM   1772  N   SER A 232      32.665  13.314  -3.532  1.00 44.88           N  
ATOM   1773  CA  SER A 232      33.159  11.936  -3.609  1.00 44.55           C  
ATOM   1774  C   SER A 232      34.580  11.864  -3.078  1.00 42.91           C  
ATOM   1775  O   SER A 232      34.961  10.898  -2.419  1.00 42.96           O  
ATOM   1776  CB  SER A 232      33.146  11.405  -5.049  1.00 45.42           C  
ATOM   1777  OG  SER A 232      32.308  12.171  -5.891  1.00 51.52           O  
ATOM   1778  N   LYS A 233      35.372  12.886  -3.371  1.00 41.65           N  
ATOM   1779  CA  LYS A 233      36.741  12.891  -2.896  1.00 42.76           C  
ATOM   1780  C   LYS A 233      36.712  12.704  -1.389  1.00 42.90           C  
ATOM   1781  O   LYS A 233      37.238  11.722  -0.869  1.00 43.63           O  
ATOM   1782  CB  LYS A 233      37.424  14.212  -3.240  1.00 44.20           C  
ATOM   1783  CG  LYS A 233      38.926  14.095  -3.465  1.00 44.36           C  
ATOM   1784  CD  LYS A 233      39.708  14.574  -2.251  1.00 46.64           C  
ATOM   1785  CE  LYS A 233      41.033  13.834  -2.114  1.00 48.67           C  
ATOM   1786  NZ  LYS A 233      41.878  14.378  -1.010  1.00 49.99           N  
ATOM   1787  N   LEU A 234      36.068  13.647  -0.705  1.00 43.05           N  
ATOM   1788  CA  LEU A 234      35.951  13.639   0.749  1.00 40.89           C  
ATOM   1789  C   LEU A 234      35.267  12.393   1.295  1.00 41.18           C  
ATOM   1790  O   LEU A 234      35.677  11.872   2.326  1.00 41.63           O  
ATOM   1791  CB  LEU A 234      35.189  14.880   1.219  1.00 40.06           C  
ATOM   1792  CG  LEU A 234      35.665  16.235   0.685  1.00 38.73           C  
ATOM   1793  CD1 LEU A 234      34.561  17.253   0.892  1.00 37.62           C  
ATOM   1794  CD2 LEU A 234      36.949  16.673   1.388  1.00 36.47           C  
ATOM   1795  N   VAL A 235      34.230  11.916   0.613  1.00 40.46           N  
ATOM   1796  CA  VAL A 235      33.519  10.721   1.063  1.00 44.17           C  
ATOM   1797  C   VAL A 235      34.458   9.526   1.086  1.00 45.36           C  
ATOM   1798  O   VAL A 235      34.314   8.616   1.903  1.00 47.79           O  
ATOM   1799  CB  VAL A 235      32.327  10.373   0.140  1.00 46.15           C  
ATOM   1800  CG1 VAL A 235      31.816   8.967   0.452  1.00 44.98           C  
ATOM   1801  CG2 VAL A 235      31.211  11.398   0.315  1.00 48.28           C  
ATOM   1802  N   THR A 236      35.420   9.530   0.176  1.00 46.25           N  
ATOM   1803  CA  THR A 236      36.382   8.448   0.091  1.00 46.84           C  
ATOM   1804  C   THR A 236      37.364   8.544   1.247  1.00 45.98           C  
ATOM   1805  O   THR A 236      37.573   7.581   1.980  1.00 47.65           O  
ATOM   1806  CB  THR A 236      37.144   8.509  -1.241  1.00 48.92           C  
ATOM   1807  OG1 THR A 236      36.264   8.119  -2.303  1.00 48.94           O  
ATOM   1808  CG2 THR A 236      38.350   7.583  -1.213  1.00 48.75           C  
ATOM   1809  N   ASP A 237      37.960   9.717   1.409  1.00 45.89           N  
ATOM   1810  CA  ASP A 237      38.915   9.940   2.484  1.00 46.64           C  
ATOM   1811  C   ASP A 237      38.245   9.785   3.846  1.00 44.62           C  
ATOM   1812  O   ASP A 237      38.840   9.256   4.779  1.00 45.37           O  
ATOM   1813  CB  ASP A 237      39.528  11.336   2.352  1.00 49.70           C  
ATOM   1814  CG  ASP A 237      40.366  11.488   1.089  1.00 52.99           C  
ATOM   1815  OD1 ASP A 237      40.592  10.472   0.389  1.00 52.54           O  
ATOM   1816  OD2 ASP A 237      40.798  12.624   0.798  1.00 54.61           O  
ATOM   1817  N   LEU A 238      37.004  10.245   3.951  1.00 43.18           N  
ATOM   1818  CA  LEU A 238      36.249  10.143   5.192  1.00 41.30           C  
ATOM   1819  C   LEU A 238      36.052   8.672   5.546  1.00 42.82           C  
ATOM   1820  O   LEU A 238      36.201   8.273   6.706  1.00 43.79           O  
ATOM   1821  CB  LEU A 238      34.880  10.810   5.040  1.00 39.11           C  
ATOM   1822  CG  LEU A 238      34.366  11.703   6.172  1.00 39.38           C  
ATOM   1823  CD1 LEU A 238      32.858  11.605   6.242  1.00 35.67           C  
ATOM   1824  CD2 LEU A 238      34.987  11.295   7.497  1.00 39.04           C  
ATOM   1825  N   THR A 239      35.718   7.866   4.542  1.00 41.50           N  
ATOM   1826  CA  THR A 239      35.498   6.442   4.760  1.00 40.44           C  
ATOM   1827  C   THR A 239      36.785   5.746   5.181  1.00 39.67           C  
ATOM   1828  O   THR A 239      36.760   4.773   5.931  1.00 39.80           O  
ATOM   1829  CB  THR A 239      34.938   5.756   3.495  1.00 40.26           C  
ATOM   1830  OG1 THR A 239      33.631   6.273   3.209  1.00 39.92           O  
ATOM   1831  CG2 THR A 239      34.837   4.249   3.703  1.00 39.89           C  
ATOM   1832  N   LYS A 240      37.915   6.238   4.697  1.00 40.65           N  
ATOM   1833  CA  LYS A 240      39.177   5.629   5.071  1.00 44.27           C  
ATOM   1834  C   LYS A 240      39.414   5.955   6.534  1.00 46.15           C  
ATOM   1835  O   LYS A 240      39.762   5.080   7.328  1.00 49.54           O  
ATOM   1836  CB  LYS A 240      40.326   6.186   4.232  1.00 43.76           C  
ATOM   1837  CG  LYS A 240      41.705   5.775   4.734  1.00 42.35           C  
ATOM   1838  N   VAL A 241      39.207   7.221   6.883  1.00 45.91           N  
ATOM   1839  CA  VAL A 241      39.400   7.688   8.250  1.00 45.20           C  
ATOM   1840  C   VAL A 241      38.588   6.876   9.248  1.00 44.79           C  
ATOM   1841  O   VAL A 241      39.154   6.251  10.139  1.00 44.69           O  
ATOM   1842  CB  VAL A 241      39.022   9.187   8.395  1.00 45.14           C  
ATOM   1843  CG1 VAL A 241      39.051   9.599   9.864  1.00 45.29           C  
ATOM   1844  CG2 VAL A 241      39.987  10.043   7.600  1.00 42.05           C  
ATOM   1845  N   HIS A 242      37.268   6.879   9.101  1.00 46.20           N  
ATOM   1846  CA  HIS A 242      36.417   6.136  10.023  1.00 46.87           C  
ATOM   1847  C   HIS A 242      36.878   4.698  10.156  1.00 45.97           C  
ATOM   1848  O   HIS A 242      36.960   4.169  11.267  1.00 42.64           O  
ATOM   1849  CB  HIS A 242      34.965   6.185   9.562  1.00 51.03           C  
ATOM   1850  CG  HIS A 242      34.288   7.482   9.876  1.00 56.79           C  
ATOM   1851  ND1 HIS A 242      33.238   7.582  10.763  1.00 58.93           N  
ATOM   1852  CD2 HIS A 242      34.515   8.738   9.421  1.00 59.67           C  
ATOM   1853  CE1 HIS A 242      32.847   8.841  10.843  1.00 59.14           C  
ATOM   1854  NE2 HIS A 242      33.606   9.564  10.038  1.00 60.71           N  
ATOM   1855  N   THR A 243      37.190   4.072   9.024  1.00 46.42           N  
ATOM   1856  CA  THR A 243      37.664   2.692   9.025  1.00 46.25           C  
ATOM   1857  C   THR A 243      38.842   2.567   9.984  1.00 46.17           C  
ATOM   1858  O   THR A 243      38.832   1.737  10.896  1.00 46.81           O  
ATOM   1859  CB  THR A 243      38.140   2.257   7.628  1.00 47.38           C  
ATOM   1860  OG1 THR A 243      37.012   2.132   6.751  1.00 49.02           O  
ATOM   1861  CG2 THR A 243      38.867   0.920   7.710  1.00 45.99           C  
ATOM   1862  N   GLU A 244      39.846   3.415   9.767  1.00 45.69           N  
ATOM   1863  CA  GLU A 244      41.065   3.441  10.571  1.00 43.34           C  
ATOM   1864  C   GLU A 244      40.846   3.804  12.031  1.00 42.13           C  
ATOM   1865  O   GLU A 244      41.443   3.203  12.913  1.00 43.46           O  
ATOM   1866  CB  GLU A 244      42.074   4.418   9.957  1.00 42.92           C  
ATOM   1867  CG  GLU A 244      43.530   4.064  10.223  1.00 44.91           C  
ATOM   1868  N   CYS A 245      40.002   4.795  12.291  1.00 43.59           N  
ATOM   1869  CA  CYS A 245      39.734   5.216  13.667  1.00 44.70           C  
ATOM   1870  C   CYS A 245      38.947   4.151  14.434  1.00 44.84           C  
ATOM   1871  O   CYS A 245      39.174   3.936  15.625  1.00 45.06           O  
ATOM   1872  CB  CYS A 245      38.961   6.544  13.682  1.00 43.93           C  
ATOM   1873  SG  CYS A 245      39.859   7.972  12.979  1.00 43.19           S  
ATOM   1874  N   CYS A 246      38.019   3.491  13.748  1.00 44.74           N  
ATOM   1875  CA  CYS A 246      37.220   2.445  14.371  1.00 44.90           C  
ATOM   1876  C   CYS A 246      38.135   1.315  14.808  1.00 45.98           C  
ATOM   1877  O   CYS A 246      37.951   0.727  15.874  1.00 46.46           O  
ATOM   1878  CB  CYS A 246      36.191   1.912  13.387  1.00 41.39           C  
ATOM   1879  SG  CYS A 246      34.827   3.068  13.102  1.00 38.38           S  
ATOM   1880  N   HIS A 247      39.122   1.018  13.969  1.00 47.59           N  
ATOM   1881  CA  HIS A 247      40.084  -0.029  14.262  1.00 49.04           C  
ATOM   1882  C   HIS A 247      40.668   0.210  15.650  1.00 47.86           C  
ATOM   1883  O   HIS A 247      41.115  -0.725  16.313  1.00 47.92           O  
ATOM   1884  CB  HIS A 247      41.198  -0.036  13.213  1.00 51.65           C  
ATOM   1885  CG  HIS A 247      41.930  -1.337  13.123  1.00 57.02           C  
ATOM   1886  ND1 HIS A 247      43.064  -1.605  13.862  1.00 59.84           N  
ATOM   1887  CD2 HIS A 247      41.680  -2.454  12.400  1.00 59.97           C  
ATOM   1888  CE1 HIS A 247      43.479  -2.832  13.597  1.00 60.40           C  
ATOM   1889  NE2 HIS A 247      42.656  -3.369  12.713  1.00 61.43           N  
ATOM   1890  N   GLY A 248      40.654   1.469  16.080  1.00 46.66           N  
ATOM   1891  CA  GLY A 248      41.166   1.813  17.394  1.00 47.18           C  
ATOM   1892  C   GLY A 248      42.600   2.315  17.445  1.00 49.04           C  
ATOM   1893  O   GLY A 248      43.117   2.606  18.530  1.00 48.29           O  
ATOM   1894  N   ASP A 249      43.259   2.412  16.292  1.00 48.86           N  
ATOM   1895  CA  ASP A 249      44.638   2.895  16.267  1.00 48.22           C  
ATOM   1896  C   ASP A 249      44.635   4.418  16.293  1.00 45.49           C  
ATOM   1897  O   ASP A 249      44.437   5.068  15.267  1.00 45.93           O  
ATOM   1898  CB  ASP A 249      45.364   2.395  15.021  1.00 50.30           C  
ATOM   1899  CG  ASP A 249      46.857   2.646  15.083  1.00 53.57           C  
ATOM   1900  OD1 ASP A 249      47.263   3.655  15.701  1.00 52.99           O  
ATOM   1901  OD2 ASP A 249      47.622   1.835  14.517  1.00 56.85           O  
ATOM   1902  N   LEU A 250      44.857   4.979  17.475  1.00 42.54           N  
ATOM   1903  CA  LEU A 250      44.845   6.422  17.648  1.00 38.97           C  
ATOM   1904  C   LEU A 250      45.801   7.175  16.732  1.00 38.05           C  
ATOM   1905  O   LEU A 250      45.410   8.156  16.105  1.00 36.31           O  
ATOM   1906  CB  LEU A 250      45.146   6.780  19.109  1.00 36.61           C  
ATOM   1907  CG  LEU A 250      45.427   8.260  19.387  1.00 35.07           C  
ATOM   1908  CD1 LEU A 250      44.159   9.076  19.173  1.00 32.23           C  
ATOM   1909  CD2 LEU A 250      45.956   8.425  20.796  1.00 35.33           C  
ATOM   1910  N   LEU A 251      47.048   6.721  16.651  1.00 38.52           N  
ATOM   1911  CA  LEU A 251      48.042   7.394  15.823  1.00 40.02           C  
ATOM   1912  C   LEU A 251      47.657   7.470  14.347  1.00 42.21           C  
ATOM   1913  O   LEU A 251      47.615   8.554  13.764  1.00 44.28           O  
ATOM   1914  CB  LEU A 251      49.400   6.713  15.982  1.00 40.17           C  
ATOM   1915  CG  LEU A 251      50.067   6.900  17.348  1.00 41.37           C  
ATOM   1916  CD1 LEU A 251      51.473   6.312  17.319  1.00 41.77           C  
ATOM   1917  CD2 LEU A 251      50.103   8.378  17.708  1.00 41.78           C  
ATOM   1918  N   GLU A 252      47.378   6.327  13.737  1.00 44.24           N  
ATOM   1919  CA  GLU A 252      46.989   6.324  12.334  1.00 46.34           C  
ATOM   1920  C   GLU A 252      45.784   7.234  12.167  1.00 44.15           C  
ATOM   1921  O   GLU A 252      45.770   8.115  11.308  1.00 45.67           O  
ATOM   1922  CB  GLU A 252      46.612   4.911  11.882  1.00 52.14           C  
ATOM   1923  CG  GLU A 252      47.792   4.034  11.522  1.00 60.80           C  
ATOM   1924  CD  GLU A 252      48.545   4.546  10.307  1.00 65.42           C  
ATOM   1925  OE1 GLU A 252      47.925   5.252   9.471  1.00 64.73           O  
ATOM   1926  OE2 GLU A 252      49.755   4.241  10.194  1.00 67.60           O  
ATOM   1927  N   CYS A 253      44.777   7.010  13.007  1.00 39.79           N  
ATOM   1928  CA  CYS A 253      43.544   7.780  12.966  1.00 36.90           C  
ATOM   1929  C   CYS A 253      43.771   9.278  13.091  1.00 36.31           C  
ATOM   1930  O   CYS A 253      43.106  10.074  12.422  1.00 35.52           O  
ATOM   1931  CB  CYS A 253      42.605   7.319  14.076  1.00 36.89           C  
ATOM   1932  SG  CYS A 253      41.226   8.463  14.386  1.00 35.09           S  
ATOM   1933  N   ALA A 254      44.703   9.656  13.957  1.00 35.92           N  
ATOM   1934  CA  ALA A 254      45.025  11.057  14.175  1.00 37.16           C  
ATOM   1935  C   ALA A 254      45.625  11.640  12.903  1.00 38.32           C  
ATOM   1936  O   ALA A 254      45.187  12.682  12.411  1.00 38.20           O  
ATOM   1937  CB  ALA A 254      46.009  11.187  15.325  1.00 38.01           C  
ATOM   1938  N   ASP A 255      46.632  10.954  12.375  1.00 40.12           N  
ATOM   1939  CA  ASP A 255      47.300  11.380  11.152  1.00 41.13           C  
ATOM   1940  C   ASP A 255      46.299  11.566  10.019  1.00 39.14           C  
ATOM   1941  O   ASP A 255      46.259  12.616   9.376  1.00 39.50           O  
ATOM   1942  CB  ASP A 255      48.345  10.345  10.740  1.00 44.01           C  
ATOM   1943  CG  ASP A 255      49.679  10.564  11.422  1.00 45.95           C  
ATOM   1944  OD1 ASP A 255      49.814  11.571  12.155  1.00 46.48           O  
ATOM   1945  OD2 ASP A 255      50.592   9.731  11.224  1.00 48.91           O  
ATOM   1946  N   ASP A 256      45.493  10.538   9.781  1.00 36.76           N  
ATOM   1947  CA  ASP A 256      44.497  10.593   8.723  1.00 39.52           C  
ATOM   1948  C   ASP A 256      43.568  11.795   8.885  1.00 40.86           C  
ATOM   1949  O   ASP A 256      43.208  12.437   7.901  1.00 43.74           O  
ATOM   1950  CB  ASP A 256      43.674   9.299   8.695  1.00 40.73           C  
ATOM   1951  CG  ASP A 256      44.479   8.099   8.213  1.00 44.68           C  
ATOM   1952  OD1 ASP A 256      45.652   8.281   7.810  1.00 46.24           O  
ATOM   1953  OD2 ASP A 256      43.940   6.967   8.237  1.00 45.88           O  
ATOM   1954  N   ARG A 257      43.180  12.101  10.120  1.00 40.84           N  
ATOM   1955  CA  ARG A 257      42.290  13.232  10.376  1.00 38.18           C  
ATOM   1956  C   ARG A 257      43.017  14.547  10.138  1.00 37.58           C  
ATOM   1957  O   ARG A 257      42.454  15.486   9.581  1.00 37.23           O  
ATOM   1958  CB  ARG A 257      41.785  13.201  11.815  1.00 38.87           C  
ATOM   1959  CG  ARG A 257      40.531  12.388  12.027  1.00 39.67           C  
ATOM   1960  CD  ARG A 257      40.276  12.204  13.510  1.00 41.66           C  
ATOM   1961  NE  ARG A 257      38.937  12.632  13.912  1.00 45.06           N  
ATOM   1962  CZ  ARG A 257      38.638  13.851  14.345  1.00 44.82           C  
ATOM   1963  NH1 ARG A 257      39.585  14.775  14.425  1.00 48.12           N  
ATOM   1964  NH2 ARG A 257      37.396  14.146  14.704  1.00 44.33           N  
ATOM   1965  N   ALA A 258      44.267  14.613  10.577  1.00 36.17           N  
ATOM   1966  CA  ALA A 258      45.059  15.817  10.403  1.00 38.26           C  
ATOM   1967  C   ALA A 258      45.152  16.121   8.912  1.00 41.84           C  
ATOM   1968  O   ALA A 258      44.956  17.265   8.490  1.00 42.48           O  
ATOM   1969  CB  ALA A 258      46.450  15.620  10.995  1.00 35.05           C  
ATOM   1970  N   ASP A 259      45.434  15.084   8.122  1.00 42.49           N  
ATOM   1971  CA  ASP A 259      45.557  15.209   6.670  1.00 43.87           C  
ATOM   1972  C   ASP A 259      44.259  15.696   6.027  1.00 43.41           C  
ATOM   1973  O   ASP A 259      44.256  16.650   5.245  1.00 45.08           O  
ATOM   1974  CB  ASP A 259      45.937  13.858   6.052  1.00 45.88           C  
ATOM   1975  CG  ASP A 259      47.415  13.546   6.180  1.00 47.15           C  
ATOM   1976  OD1 ASP A 259      48.181  14.433   6.608  1.00 48.69           O  
ATOM   1977  OD2 ASP A 259      47.811  12.407   5.851  1.00 48.78           O  
ATOM   1978  N   LEU A 260      43.160  15.023   6.350  1.00 40.66           N  
ATOM   1979  CA  LEU A 260      41.858  15.375   5.805  1.00 39.15           C  
ATOM   1980  C   LEU A 260      41.511  16.816   6.145  1.00 40.06           C  
ATOM   1981  O   LEU A 260      40.895  17.528   5.352  1.00 39.30           O  
ATOM   1982  CB  LEU A 260      40.794  14.440   6.369  1.00 36.52           C  
ATOM   1983  CG  LEU A 260      39.386  14.602   5.807  1.00 37.47           C  
ATOM   1984  CD1 LEU A 260      39.433  14.736   4.291  1.00 38.28           C  
ATOM   1985  CD2 LEU A 260      38.555  13.401   6.213  1.00 37.63           C  
ATOM   1986  N   ALA A 261      41.913  17.241   7.334  1.00 41.62           N  
ATOM   1987  CA  ALA A 261      41.647  18.598   7.778  1.00 44.29           C  
ATOM   1988  C   ALA A 261      42.434  19.589   6.910  1.00 46.20           C  
ATOM   1989  O   ALA A 261      41.879  20.576   6.415  1.00 44.60           O  
ATOM   1990  CB  ALA A 261      42.032  18.750   9.256  1.00 40.85           C  
ATOM   1991  N   LYS A 262      43.725  19.320   6.725  1.00 47.44           N  
ATOM   1992  CA  LYS A 262      44.571  20.194   5.914  1.00 49.55           C  
ATOM   1993  C   LYS A 262      43.941  20.338   4.535  1.00 50.53           C  
ATOM   1994  O   LYS A 262      43.801  21.445   4.011  1.00 50.50           O  
ATOM   1995  CB  LYS A 262      45.984  19.609   5.781  1.00 49.65           C  
ATOM   1996  N   TYR A 263      43.551  19.207   3.958  1.00 50.16           N  
ATOM   1997  CA  TYR A 263      42.924  19.204   2.649  1.00 49.69           C  
ATOM   1998  C   TYR A 263      41.742  20.171   2.592  1.00 51.48           C  
ATOM   1999  O   TYR A 263      41.784  21.173   1.882  1.00 53.44           O  
ATOM   2000  CB  TYR A 263      42.446  17.794   2.293  1.00 49.10           C  
ATOM   2001  CG  TYR A 263      41.856  17.712   0.908  1.00 48.33           C  
ATOM   2002  CD1 TYR A 263      40.506  17.967   0.691  1.00 49.30           C  
ATOM   2003  CD2 TYR A 263      42.660  17.440  -0.192  1.00 48.08           C  
ATOM   2004  CE1 TYR A 263      39.974  17.960  -0.589  1.00 51.85           C  
ATOM   2005  CE2 TYR A 263      42.142  17.430  -1.473  1.00 49.02           C  
ATOM   2006  CZ  TYR A 263      40.800  17.692  -1.671  1.00 51.69           C  
ATOM   2007  OH  TYR A 263      40.291  17.699  -2.952  1.00 52.37           O  
ATOM   2008  N   ILE A 264      40.688  19.870   3.344  1.00 51.58           N  
ATOM   2009  CA  ILE A 264      39.498  20.712   3.350  1.00 50.30           C  
ATOM   2010  C   ILE A 264      39.830  22.195   3.505  1.00 51.80           C  
ATOM   2011  O   ILE A 264      39.230  23.038   2.845  1.00 52.19           O  
ATOM   2012  CB  ILE A 264      38.515  20.297   4.485  1.00 48.23           C  
ATOM   2013  CG1 ILE A 264      37.991  18.880   4.230  1.00 46.05           C  
ATOM   2014  CG2 ILE A 264      37.351  21.282   4.565  1.00 44.78           C  
ATOM   2015  CD1 ILE A 264      36.746  18.528   5.011  1.00 40.51           C  
ATOM   2016  N   CYS A 265      40.794  22.514   4.360  1.00 52.47           N  
ATOM   2017  CA  CYS A 265      41.148  23.911   4.598  1.00 55.32           C  
ATOM   2018  C   CYS A 265      41.836  24.633   3.442  1.00 57.12           C  
ATOM   2019  O   CYS A 265      41.568  25.813   3.196  1.00 56.50           O  
ATOM   2020  CB  CYS A 265      41.991  24.020   5.866  1.00 54.68           C  
ATOM   2021  SG  CYS A 265      40.968  23.912   7.364  1.00 52.76           S  
ATOM   2022  N   GLU A 266      42.725  23.938   2.741  1.00 59.39           N  
ATOM   2023  CA  GLU A 266      43.409  24.538   1.604  1.00 61.90           C  
ATOM   2024  C   GLU A 266      42.391  24.787   0.486  1.00 60.63           C  
ATOM   2025  O   GLU A 266      42.273  25.899  -0.033  1.00 62.21           O  
ATOM   2026  CB  GLU A 266      44.517  23.613   1.100  1.00 65.01           C  
ATOM   2027  CG  GLU A 266      45.779  23.643   1.948  1.00 70.87           C  
ATOM   2028  CD  GLU A 266      46.570  22.351   1.849  1.00 75.87           C  
ATOM   2029  OE1 GLU A 266      46.298  21.559   0.916  1.00 78.50           O  
ATOM   2030  OE2 GLU A 266      47.459  22.128   2.702  1.00 78.15           O  
ATOM   2031  N   ASN A 267      41.643  23.750   0.131  1.00 57.29           N  
ATOM   2032  CA  ASN A 267      40.643  23.861  -0.919  1.00 55.98           C  
ATOM   2033  C   ASN A 267      39.334  24.366  -0.337  1.00 54.98           C  
ATOM   2034  O   ASN A 267      38.253  24.099  -0.861  1.00 55.12           O  
ATOM   2035  CB  ASN A 267      40.437  22.505  -1.580  1.00 56.02           C  
ATOM   2036  CG  ASN A 267      41.734  21.740  -1.747  1.00 58.33           C  
ATOM   2037  OD1 ASN A 267      41.727  20.586  -2.164  1.00 62.51           O  
ATOM   2038  ND2 ASN A 267      42.856  22.377  -1.419  1.00 59.03           N  
ATOM   2039  N   GLN A 268      39.457  25.116   0.750  1.00 54.25           N  
ATOM   2040  CA  GLN A 268      38.321  25.677   1.465  1.00 54.88           C  
ATOM   2041  C   GLN A 268      37.301  26.392   0.586  1.00 55.76           C  
ATOM   2042  O   GLN A 268      36.102  26.131   0.664  1.00 53.83           O  
ATOM   2043  CB  GLN A 268      38.853  26.626   2.529  1.00 55.69           C  
ATOM   2044  CG  GLN A 268      37.864  27.621   3.061  1.00 55.78           C  
ATOM   2045  CD  GLN A 268      38.463  28.423   4.186  1.00 56.86           C  
ATOM   2046  OE1 GLN A 268      37.806  29.284   4.772  1.00 60.52           O  
ATOM   2047  NE2 GLN A 268      39.726  28.144   4.498  1.00 53.12           N  
ATOM   2048  N   ASP A 269      37.790  27.304  -0.245  1.00 60.24           N  
ATOM   2049  CA  ASP A 269      36.946  28.081  -1.151  1.00 61.69           C  
ATOM   2050  C   ASP A 269      36.137  27.202  -2.087  1.00 59.55           C  
ATOM   2051  O   ASP A 269      35.110  27.619  -2.619  1.00 57.93           O  
ATOM   2052  CB  ASP A 269      37.817  29.015  -1.989  1.00 67.07           C  
ATOM   2053  CG  ASP A 269      37.908  30.403  -1.401  1.00 72.44           C  
ATOM   2054  OD1 ASP A 269      36.962  31.194  -1.624  1.00 74.83           O  
ATOM   2055  OD2 ASP A 269      38.918  30.699  -0.717  1.00 73.60           O  
ATOM   2056  N   SER A 270      36.618  25.983  -2.286  1.00 58.59           N  
ATOM   2057  CA  SER A 270      35.973  25.032  -3.171  1.00 58.32           C  
ATOM   2058  C   SER A 270      34.998  24.114  -2.431  1.00 56.37           C  
ATOM   2059  O   SER A 270      34.326  23.282  -3.046  1.00 55.81           O  
ATOM   2060  CB  SER A 270      37.053  24.202  -3.871  1.00 61.07           C  
ATOM   2061  OG  SER A 270      36.499  23.089  -4.548  1.00 68.66           O  
ATOM   2062  N   ILE A 271      34.905  24.275  -1.115  1.00 53.24           N  
ATOM   2063  CA  ILE A 271      34.028  23.420  -0.328  1.00 48.04           C  
ATOM   2064  C   ILE A 271      32.919  24.152   0.428  1.00 46.02           C  
ATOM   2065  O   ILE A 271      31.746  23.797   0.313  1.00 44.03           O  
ATOM   2066  CB  ILE A 271      34.864  22.572   0.662  1.00 45.36           C  
ATOM   2067  CG1 ILE A 271      35.821  21.663  -0.118  1.00 39.69           C  
ATOM   2068  CG2 ILE A 271      33.948  21.740   1.541  1.00 45.90           C  
ATOM   2069  CD1 ILE A 271      37.042  21.242   0.655  1.00 37.38           C  
ATOM   2070  N   SER A 272      33.278  25.171   1.200  1.00 45.56           N  
ATOM   2071  CA  SER A 272      32.274  25.913   1.958  1.00 44.89           C  
ATOM   2072  C   SER A 272      32.803  27.232   2.491  1.00 44.13           C  
ATOM   2073  O   SER A 272      33.983  27.351   2.804  1.00 43.13           O  
ATOM   2074  CB  SER A 272      31.768  25.068   3.127  1.00 45.26           C  
ATOM   2075  OG  SER A 272      31.107  25.871   4.089  1.00 44.31           O  
ATOM   2076  N   SER A 273      31.910  28.214   2.601  1.00 45.98           N  
ATOM   2077  CA  SER A 273      32.257  29.546   3.098  1.00 48.46           C  
ATOM   2078  C   SER A 273      32.310  29.605   4.625  1.00 49.30           C  
ATOM   2079  O   SER A 273      33.143  30.306   5.197  1.00 51.07           O  
ATOM   2080  CB  SER A 273      31.243  30.574   2.589  1.00 49.76           C  
ATOM   2081  OG  SER A 273      29.992  30.429   3.244  1.00 50.98           O  
ATOM   2082  N   LYS A 274      31.411  28.876   5.278  1.00 49.80           N  
ATOM   2083  CA  LYS A 274      31.351  28.841   6.735  1.00 50.35           C  
ATOM   2084  C   LYS A 274      32.466  27.939   7.258  1.00 51.73           C  
ATOM   2085  O   LYS A 274      32.259  27.155   8.178  1.00 53.63           O  
ATOM   2086  CB  LYS A 274      29.983  28.302   7.186  1.00 47.15           C  
ATOM   2087  CG  LYS A 274      28.797  28.867   6.406  1.00 47.53           C  
ATOM   2088  CD  LYS A 274      27.587  29.126   7.299  1.00 48.53           C  
ATOM   2089  CE  LYS A 274      26.827  30.384   6.867  1.00 48.17           C  
ATOM   2090  NZ  LYS A 274      25.341  30.190   6.756  1.00 47.71           N  
ATOM   2091  N   LEU A 275      33.660  28.077   6.694  1.00 53.29           N  
ATOM   2092  CA  LEU A 275      34.778  27.220   7.073  1.00 54.69           C  
ATOM   2093  C   LEU A 275      36.076  27.931   7.443  1.00 56.81           C  
ATOM   2094  O   LEU A 275      37.117  27.283   7.588  1.00 57.04           O  
ATOM   2095  CB  LEU A 275      35.060  26.256   5.920  1.00 55.82           C  
ATOM   2096  CG  LEU A 275      35.534  24.838   6.208  1.00 57.22           C  
ATOM   2097  CD1 LEU A 275      34.664  24.200   7.289  1.00 57.14           C  
ATOM   2098  CD2 LEU A 275      35.480  24.036   4.912  1.00 55.97           C  
ATOM   2099  N   LYS A 276      36.028  29.249   7.595  1.00 57.64           N  
ATOM   2100  CA  LYS A 276      37.230  30.005   7.931  1.00 59.40           C  
ATOM   2101  C   LYS A 276      37.735  29.717   9.341  1.00 59.83           C  
ATOM   2102  O   LYS A 276      38.863  29.264   9.524  1.00 61.88           O  
ATOM   2103  CB  LYS A 276      36.964  31.504   7.775  1.00 59.93           C  
ATOM   2104  N   GLU A 277      36.887  29.993  10.325  1.00 60.29           N  
ATOM   2105  CA  GLU A 277      37.175  29.789  11.746  1.00 61.14           C  
ATOM   2106  C   GLU A 277      37.950  28.511  12.040  1.00 58.50           C  
ATOM   2107  O   GLU A 277      39.034  28.553  12.625  1.00 58.81           O  
ATOM   2108  CB  GLU A 277      35.864  29.769  12.539  1.00 64.92           C  
ATOM   2109  CG  GLU A 277      34.862  30.841  12.120  1.00 73.92           C  
ATOM   2110  CD  GLU A 277      34.282  30.625  10.717  1.00 80.14           C  
ATOM   2111  OE1 GLU A 277      34.610  29.601  10.073  1.00 84.61           O  
ATOM   2112  OE2 GLU A 277      33.493  31.483  10.254  1.00 83.45           O  
ATOM   2113  N   CYS A 278      37.382  27.381  11.637  1.00 54.49           N  
ATOM   2114  CA  CYS A 278      37.996  26.077  11.854  1.00 52.11           C  
ATOM   2115  C   CYS A 278      39.384  25.972  11.263  1.00 52.88           C  
ATOM   2116  O   CYS A 278      40.279  25.351  11.840  1.00 52.13           O  
ATOM   2117  CB  CYS A 278      37.117  24.997  11.242  1.00 49.99           C  
ATOM   2118  SG  CYS A 278      35.527  24.930  12.091  1.00 46.00           S  
ATOM   2119  N   CYS A 279      39.557  26.584  10.100  1.00 54.22           N  
ATOM   2120  CA  CYS A 279      40.829  26.534   9.407  1.00 54.75           C  
ATOM   2121  C   CYS A 279      41.897  27.433  10.005  1.00 55.14           C  
ATOM   2122  O   CYS A 279      43.087  27.244   9.752  1.00 54.36           O  
ATOM   2123  CB  CYS A 279      40.590  26.836   7.935  1.00 54.70           C  
ATOM   2124  SG  CYS A 279      39.671  25.459   7.172  1.00 54.17           S  
ATOM   2125  N   GLU A 280      41.469  28.396  10.814  1.00 56.70           N  
ATOM   2126  CA  GLU A 280      42.393  29.305  11.477  1.00 58.09           C  
ATOM   2127  C   GLU A 280      42.781  28.716  12.840  1.00 58.48           C  
ATOM   2128  O   GLU A 280      43.769  29.132  13.447  1.00 59.90           O  
ATOM   2129  CB  GLU A 280      41.745  30.684  11.663  1.00 57.44           C  
ATOM   2130  N   LYS A 281      42.008  27.736  13.307  1.00 57.97           N  
ATOM   2131  CA  LYS A 281      42.266  27.093  14.597  1.00 56.04           C  
ATOM   2132  C   LYS A 281      43.521  26.219  14.592  1.00 54.96           C  
ATOM   2133  O   LYS A 281      44.001  25.799  13.532  1.00 54.46           O  
ATOM   2134  CB  LYS A 281      41.059  26.253  15.023  1.00 55.91           C  
ATOM   2135  CG  LYS A 281      39.831  27.083  15.351  1.00 58.45           C  
ATOM   2136  CD  LYS A 281      39.023  26.481  16.484  1.00 59.09           C  
ATOM   2137  CE  LYS A 281      37.976  27.462  16.978  1.00 59.74           C  
ATOM   2138  NZ  LYS A 281      37.824  27.398  18.454  1.00 61.08           N  
ATOM   2139  N   PRO A 282      44.069  25.937  15.790  1.00 53.55           N  
ATOM   2140  CA  PRO A 282      45.275  25.112  15.908  1.00 52.10           C  
ATOM   2141  C   PRO A 282      45.063  23.661  15.509  1.00 52.11           C  
ATOM   2142  O   PRO A 282      43.931  23.179  15.431  1.00 52.65           O  
ATOM   2143  CB  PRO A 282      45.674  25.256  17.373  1.00 49.93           C  
ATOM   2144  CG  PRO A 282      44.424  25.626  18.074  1.00 50.11           C  
ATOM   2145  CD  PRO A 282      43.583  26.393  17.106  1.00 52.38           C  
ATOM   2146  N   LEU A 283      46.177  22.981  15.260  1.00 51.48           N  
ATOM   2147  CA  LEU A 283      46.199  21.582  14.852  1.00 50.14           C  
ATOM   2148  C   LEU A 283      45.155  20.682  15.521  1.00 50.27           C  
ATOM   2149  O   LEU A 283      44.314  20.087  14.850  1.00 52.28           O  
ATOM   2150  CB  LEU A 283      47.596  21.017  15.100  1.00 47.78           C  
ATOM   2151  CG  LEU A 283      47.767  19.511  14.938  1.00 50.35           C  
ATOM   2152  CD1 LEU A 283      47.576  19.111  13.478  1.00 52.19           C  
ATOM   2153  CD2 LEU A 283      49.148  19.119  15.420  1.00 52.08           C  
ATOM   2154  N   LEU A 284      45.211  20.592  16.843  1.00 49.80           N  
ATOM   2155  CA  LEU A 284      44.300  19.752  17.610  1.00 48.29           C  
ATOM   2156  C   LEU A 284      42.802  19.946  17.387  1.00 48.53           C  
ATOM   2157  O   LEU A 284      42.059  18.970  17.336  1.00 50.92           O  
ATOM   2158  CB  LEU A 284      44.599  19.913  19.102  1.00 48.20           C  
ATOM   2159  CG  LEU A 284      44.500  18.659  19.967  1.00 46.65           C  
ATOM   2160  CD1 LEU A 284      45.676  17.752  19.681  1.00 48.23           C  
ATOM   2161  CD2 LEU A 284      44.478  19.053  21.432  1.00 47.72           C  
ATOM   2162  N   GLU A 285      42.350  21.187  17.249  1.00 47.86           N  
ATOM   2163  CA  GLU A 285      40.920  21.447  17.087  1.00 47.18           C  
ATOM   2164  C   GLU A 285      40.397  21.578  15.662  1.00 46.99           C  
ATOM   2165  O   GLU A 285      39.189  21.720  15.456  1.00 45.09           O  
ATOM   2166  CB  GLU A 285      40.543  22.707  17.868  1.00 49.26           C  
ATOM   2167  CG  GLU A 285      41.578  23.127  18.902  1.00 53.70           C  
ATOM   2168  CD  GLU A 285      41.089  24.263  19.782  1.00 58.90           C  
ATOM   2169  OE1 GLU A 285      40.732  25.326  19.234  1.00 63.00           O  
ATOM   2170  OE2 GLU A 285      41.058  24.099  21.022  1.00 62.40           O  
ATOM   2171  N   LYS A 286      41.292  21.519  14.683  1.00 47.61           N  
ATOM   2172  CA  LYS A 286      40.893  21.671  13.287  1.00 48.29           C  
ATOM   2173  C   LYS A 286      39.821  20.698  12.812  1.00 49.12           C  
ATOM   2174  O   LYS A 286      38.715  21.123  12.463  1.00 50.27           O  
ATOM   2175  CB  LYS A 286      42.117  21.580  12.373  1.00 50.22           C  
ATOM   2176  CG  LYS A 286      42.863  22.901  12.228  1.00 51.88           C  
ATOM   2177  CD  LYS A 286      43.099  23.267  10.777  1.00 52.26           C  
ATOM   2178  CE  LYS A 286      44.524  23.760  10.571  1.00 52.52           C  
ATOM   2179  NZ  LYS A 286      45.476  22.619  10.444  1.00 52.41           N  
ATOM   2180  N   SER A 287      40.136  19.403  12.790  1.00 48.23           N  
ATOM   2181  CA  SER A 287      39.164  18.405  12.333  1.00 47.10           C  
ATOM   2182  C   SER A 287      37.911  18.394  13.192  1.00 45.49           C  
ATOM   2183  O   SER A 287      36.804  18.220  12.679  1.00 44.23           O  
ATOM   2184  CB  SER A 287      39.778  16.996  12.304  1.00 46.72           C  
ATOM   2185  OG  SER A 287      40.764  16.829  13.302  1.00 47.86           O  
ATOM   2186  N   HIS A 288      38.082  18.583  14.498  1.00 45.97           N  
ATOM   2187  CA  HIS A 288      36.940  18.600  15.401  1.00 46.38           C  
ATOM   2188  C   HIS A 288      36.035  19.763  15.021  1.00 45.22           C  
ATOM   2189  O   HIS A 288      34.812  19.623  14.949  1.00 44.95           O  
ATOM   2190  CB  HIS A 288      37.384  18.764  16.861  1.00 48.18           C  
ATOM   2191  CG  HIS A 288      36.257  19.097  17.791  1.00 49.73           C  
ATOM   2192  ND1 HIS A 288      35.429  18.134  18.330  1.00 51.05           N  
ATOM   2193  CD2 HIS A 288      35.776  20.288  18.221  1.00 49.89           C  
ATOM   2194  CE1 HIS A 288      34.486  18.717  19.049  1.00 51.12           C  
ATOM   2195  NE2 HIS A 288      34.674  20.025  18.999  1.00 50.91           N  
ATOM   2196  N   CYS A 289      36.652  20.913  14.781  1.00 45.06           N  
ATOM   2197  CA  CYS A 289      35.922  22.115  14.407  1.00 45.08           C  
ATOM   2198  C   CYS A 289      35.114  21.881  13.129  1.00 44.64           C  
ATOM   2199  O   CYS A 289      33.891  22.047  13.107  1.00 44.39           O  
ATOM   2200  CB  CYS A 289      36.910  23.271  14.209  1.00 45.74           C  
ATOM   2201  SG  CYS A 289      36.136  24.906  14.023  1.00 50.84           S  
ATOM   2202  N   ILE A 290      35.809  21.483  12.068  1.00 44.47           N  
ATOM   2203  CA  ILE A 290      35.182  21.227  10.775  1.00 43.47           C  
ATOM   2204  C   ILE A 290      34.019  20.242  10.870  1.00 43.58           C  
ATOM   2205  O   ILE A 290      32.989  20.421  10.212  1.00 44.17           O  
ATOM   2206  CB  ILE A 290      36.213  20.664   9.763  1.00 43.70           C  
ATOM   2207  CG1 ILE A 290      37.387  21.628   9.623  1.00 41.76           C  
ATOM   2208  CG2 ILE A 290      35.554  20.433   8.410  1.00 41.54           C  
ATOM   2209  CD1 ILE A 290      38.477  21.102   8.734  1.00 43.52           C  
ATOM   2210  N   ALA A 291      34.192  19.208  11.689  1.00 42.17           N  
ATOM   2211  CA  ALA A 291      33.181  18.168  11.862  1.00 41.75           C  
ATOM   2212  C   ALA A 291      31.857  18.682  12.406  1.00 42.05           C  
ATOM   2213  O   ALA A 291      30.804  18.101  12.156  1.00 38.64           O  
ATOM   2214  CB  ALA A 291      33.723  17.085  12.773  1.00 42.77           C  
ATOM   2215  N   GLU A 292      31.919  19.775  13.152  1.00 45.81           N  
ATOM   2216  CA  GLU A 292      30.729  20.364  13.746  1.00 50.04           C  
ATOM   2217  C   GLU A 292      30.214  21.565  12.943  1.00 50.32           C  
ATOM   2218  O   GLU A 292      29.191  22.168  13.294  1.00 49.14           O  
ATOM   2219  CB  GLU A 292      31.049  20.796  15.177  1.00 54.33           C  
ATOM   2220  CG  GLU A 292      30.740  19.758  16.234  1.00 62.48           C  
ATOM   2221  CD  GLU A 292      30.493  20.393  17.586  1.00 69.22           C  
ATOM   2222  OE1 GLU A 292      31.265  21.304  17.958  1.00 72.61           O  
ATOM   2223  OE2 GLU A 292      29.529  19.991  18.273  1.00 73.80           O  
ATOM   2224  N   VAL A 293      30.928  21.896  11.866  1.00 49.62           N  
ATOM   2225  CA  VAL A 293      30.594  23.022  10.992  1.00 47.45           C  
ATOM   2226  C   VAL A 293      29.128  23.096  10.599  1.00 48.38           C  
ATOM   2227  O   VAL A 293      28.425  22.084  10.533  1.00 49.03           O  
ATOM   2228  CB  VAL A 293      31.456  22.998   9.698  1.00 46.81           C  
ATOM   2229  CG1 VAL A 293      30.712  22.301   8.564  1.00 46.32           C  
ATOM   2230  CG2 VAL A 293      31.817  24.402   9.301  1.00 43.88           C  
ATOM   2231  N   GLU A 294      28.675  24.306  10.315  1.00 49.89           N  
ATOM   2232  CA  GLU A 294      27.291  24.512   9.937  1.00 53.26           C  
ATOM   2233  C   GLU A 294      27.069  24.422   8.440  1.00 52.68           C  
ATOM   2234  O   GLU A 294      27.979  24.675   7.649  1.00 53.41           O  
ATOM   2235  CB  GLU A 294      26.824  25.873  10.426  1.00 59.51           C  
ATOM   2236  CG  GLU A 294      25.322  25.998  10.530  1.00 70.23           C  
ATOM   2237  CD  GLU A 294      24.911  27.166  11.404  1.00 77.59           C  
ATOM   2238  OE1 GLU A 294      25.773  28.038  11.666  1.00 81.06           O  
ATOM   2239  OE2 GLU A 294      23.733  27.214  11.830  1.00 82.21           O  
ATOM   2240  N   ASN A 295      25.849  24.066   8.056  1.00 51.20           N  
ATOM   2241  CA  ASN A 295      25.494  23.959   6.651  1.00 50.88           C  
ATOM   2242  C   ASN A 295      25.768  25.301   5.986  1.00 53.31           C  
ATOM   2243  O   ASN A 295      25.393  26.345   6.519  1.00 54.80           O  
ATOM   2244  CB  ASN A 295      24.004  23.633   6.495  1.00 47.69           C  
ATOM   2245  CG  ASN A 295      23.695  22.170   6.722  1.00 46.05           C  
ATOM   2246  OD1 ASN A 295      24.577  21.384   7.057  1.00 45.73           O  
ATOM   2247  ND2 ASN A 295      22.432  21.795   6.542  1.00 44.57           N  
ATOM   2248  N   ASP A 296      26.433  25.274   4.836  1.00 54.07           N  
ATOM   2249  CA  ASP A 296      26.714  26.497   4.092  1.00 55.02           C  
ATOM   2250  C   ASP A 296      25.391  26.845   3.419  1.00 56.76           C  
ATOM   2251  O   ASP A 296      24.489  26.005   3.358  1.00 56.54           O  
ATOM   2252  CB  ASP A 296      27.787  26.229   3.029  1.00 54.50           C  
ATOM   2253  CG  ASP A 296      28.383  27.501   2.459  1.00 51.98           C  
ATOM   2254  OD1 ASP A 296      27.773  28.573   2.617  1.00 53.32           O  
ATOM   2255  OD2 ASP A 296      29.467  27.426   1.850  1.00 51.02           O  
ATOM   2256  N   GLU A 297      25.248  28.076   2.940  1.00 59.02           N  
ATOM   2257  CA  GLU A 297      24.015  28.426   2.253  1.00 62.29           C  
ATOM   2258  C   GLU A 297      24.115  27.797   0.873  1.00 62.36           C  
ATOM   2259  O   GLU A 297      25.180  27.794   0.245  1.00 62.18           O  
ATOM   2260  CB  GLU A 297      23.837  29.940   2.151  1.00 66.48           C  
ATOM   2261  CG  GLU A 297      22.506  30.429   2.725  1.00 73.83           C  
ATOM   2262  CD  GLU A 297      22.479  31.930   2.973  1.00 78.48           C  
ATOM   2263  OE1 GLU A 297      23.402  32.439   3.648  1.00 81.34           O  
ATOM   2264  OE2 GLU A 297      21.533  32.598   2.493  1.00 79.39           O  
ATOM   2265  N   MET A 298      23.010  27.234   0.407  1.00 64.21           N  
ATOM   2266  CA  MET A 298      23.005  26.581  -0.892  1.00 65.42           C  
ATOM   2267  C   MET A 298      22.882  27.551  -2.049  1.00 66.47           C  
ATOM   2268  O   MET A 298      22.157  28.535  -1.972  1.00 66.09           O  
ATOM   2269  CB  MET A 298      21.861  25.571  -0.980  1.00 66.48           C  
ATOM   2270  CG  MET A 298      20.505  26.134  -0.620  1.00 66.37           C  
ATOM   2271  SD  MET A 298      19.212  24.878  -0.671  1.00 69.25           S  
ATOM   2272  CE  MET A 298      17.990  25.670  -1.742  1.00 69.14           C  
ATOM   2273  N   PRO A 299      23.632  27.293  -3.135  1.00 67.90           N  
ATOM   2274  CA  PRO A 299      23.542  28.192  -4.290  1.00 69.97           C  
ATOM   2275  C   PRO A 299      22.057  28.428  -4.560  1.00 71.58           C  
ATOM   2276  O   PRO A 299      21.247  27.501  -4.464  1.00 72.75           O  
ATOM   2277  CB  PRO A 299      24.262  27.422  -5.399  1.00 69.86           C  
ATOM   2278  CG  PRO A 299      25.230  26.580  -4.657  1.00 69.21           C  
ATOM   2279  CD  PRO A 299      24.640  26.241  -3.322  1.00 68.87           C  
ATOM   2280  N   ALA A 300      21.690  29.667  -4.864  1.00 71.87           N  
ATOM   2281  CA  ALA A 300      20.285  29.991  -5.065  1.00 73.37           C  
ATOM   2282  C   ALA A 300      19.863  29.756  -6.502  1.00 73.27           C  
ATOM   2283  O   ALA A 300      18.691  29.855  -6.855  1.00 72.23           O  
ATOM   2284  CB  ALA A 300      20.020  31.448  -4.639  1.00 73.69           C  
ATOM   2285  N   ASP A 301      20.835  29.431  -7.335  1.00 72.84           N  
ATOM   2286  CA  ASP A 301      20.541  29.158  -8.721  1.00 74.31           C  
ATOM   2287  C   ASP A 301      20.822  27.693  -8.977  1.00 75.33           C  
ATOM   2288  O   ASP A 301      21.907  27.378  -9.438  1.00 77.07           O  
ATOM   2289  CB  ASP A 301      21.431  30.018  -9.632  1.00 73.73           C  
ATOM   2290  N   LEU A 302      19.849  26.831  -8.696  1.00 75.14           N  
ATOM   2291  CA  LEU A 302      20.023  25.422  -8.901  1.00 74.76           C  
ATOM   2292  C   LEU A 302      18.785  24.804  -9.551  1.00 73.79           C  
ATOM   2293  O   LEU A 302      17.632  25.036  -9.089  1.00 74.18           O  
ATOM   2294  CB  LEU A 302      20.233  24.674  -7.576  1.00 74.93           C  
ATOM   2295  CG  LEU A 302      21.074  25.184  -6.408  1.00 76.07           C  
ATOM   2296  CD1 LEU A 302      20.711  24.358  -5.159  1.00 77.30           C  
ATOM   2297  CD2 LEU A 302      22.499  25.004  -6.822  1.00 74.75           C  
ATOM   2298  N   PRO A 303      18.994  24.054 -10.645  1.00 72.83           N  
ATOM   2299  CA  PRO A 303      18.067  23.316 -11.494  1.00 71.91           C  
ATOM   2300  C   PRO A 303      17.107  22.420 -10.706  1.00 71.41           C  
ATOM   2301  O   PRO A 303      17.245  22.234  -9.496  1.00 73.20           O  
ATOM   2302  CB  PRO A 303      18.986  22.471 -12.375  1.00 73.32           C  
ATOM   2303  CG  PRO A 303      20.102  23.433 -12.634  1.00 73.98           C  
ATOM   2304  CD  PRO A 303      20.358  24.009 -11.240  1.00 72.72           C  
ATOM   2305  N   SER A 304      16.252  21.756 -11.447  1.00 69.66           N  
ATOM   2306  CA  SER A 304      15.287  20.858 -10.887  1.00 68.89           C  
ATOM   2307  C   SER A 304      15.700  19.432 -11.195  1.00 69.07           C  
ATOM   2308  O   SER A 304      15.822  19.078 -12.353  1.00 71.02           O  
ATOM   2309  CB  SER A 304      13.984  21.202 -11.569  1.00 68.87           C  
ATOM   2310  OG  SER A 304      12.995  20.241 -11.329  1.00 70.56           O  
ATOM   2311  N   LEU A 305      15.893  18.619 -10.164  1.00 68.23           N  
ATOM   2312  CA  LEU A 305      16.258  17.196 -10.304  1.00 67.60           C  
ATOM   2313  C   LEU A 305      15.496  16.523 -11.437  1.00 67.05           C  
ATOM   2314  O   LEU A 305      16.027  15.635 -12.115  1.00 68.40           O  
ATOM   2315  CB  LEU A 305      15.943  16.476  -8.999  1.00 67.27           C  
ATOM   2316  CG  LEU A 305      16.484  17.150  -7.740  1.00 65.88           C  
ATOM   2317  CD1 LEU A 305      15.652  16.747  -6.539  1.00 65.30           C  
ATOM   2318  CD2 LEU A 305      17.912  16.716  -7.580  1.00 65.16           C  
ATOM   2319  N   ALA A 306      14.254  16.959 -11.642  1.00 66.10           N  
ATOM   2320  CA  ALA A 306      13.385  16.411 -12.688  1.00 64.54           C  
ATOM   2321  C   ALA A 306      13.962  16.466 -14.107  1.00 62.63           C  
ATOM   2322  O   ALA A 306      13.569  15.680 -14.954  1.00 63.09           O  
ATOM   2323  CB  ALA A 306      12.007  17.112 -12.645  1.00 64.81           C  
ATOM   2324  N   ALA A 307      14.879  17.388 -14.373  1.00 61.09           N  
ATOM   2325  CA  ALA A 307      15.450  17.476 -15.713  1.00 60.00           C  
ATOM   2326  C   ALA A 307      16.497  16.393 -15.954  1.00 59.48           C  
ATOM   2327  O   ALA A 307      16.419  15.652 -16.934  1.00 59.43           O  
ATOM   2328  CB  ALA A 307      16.073  18.849 -15.935  1.00 59.23           C  
ATOM   2329  N   ASP A 308      17.470  16.313 -15.048  1.00 58.44           N  
ATOM   2330  CA  ASP A 308      18.567  15.354 -15.144  1.00 56.03           C  
ATOM   2331  C   ASP A 308      18.258  13.961 -14.612  1.00 53.74           C  
ATOM   2332  O   ASP A 308      19.049  13.038 -14.803  1.00 54.68           O  
ATOM   2333  CB  ASP A 308      19.789  15.893 -14.398  1.00 58.61           C  
ATOM   2334  CG  ASP A 308      20.566  16.909 -15.206  1.00 63.18           C  
ATOM   2335  OD1 ASP A 308      19.969  17.931 -15.611  1.00 66.68           O  
ATOM   2336  OD2 ASP A 308      21.775  16.689 -15.435  1.00 65.11           O  
ATOM   2337  N   PHE A 309      17.117  13.793 -13.955  1.00 50.09           N  
ATOM   2338  CA  PHE A 309      16.802  12.493 -13.391  1.00 48.34           C  
ATOM   2339  C   PHE A 309      15.441  11.913 -13.754  1.00 49.98           C  
ATOM   2340  O   PHE A 309      15.261  10.697 -13.692  1.00 49.62           O  
ATOM   2341  CB  PHE A 309      16.965  12.549 -11.864  1.00 44.84           C  
ATOM   2342  CG  PHE A 309      18.381  12.829 -11.419  1.00 40.39           C  
ATOM   2343  CD1 PHE A 309      19.339  11.815 -11.424  1.00 38.06           C  
ATOM   2344  CD2 PHE A 309      18.778  14.118 -11.073  1.00 38.29           C  
ATOM   2345  CE1 PHE A 309      20.675  12.079 -11.101  1.00 34.55           C  
ATOM   2346  CE2 PHE A 309      20.111  14.394 -10.749  1.00 36.75           C  
ATOM   2347  CZ  PHE A 309      21.061  13.370 -10.767  1.00 35.82           C  
ATOM   2348  N   VAL A 310      14.493  12.757 -14.139  1.00 53.66           N  
ATOM   2349  CA  VAL A 310      13.171  12.265 -14.484  1.00 57.94           C  
ATOM   2350  C   VAL A 310      12.773  12.618 -15.908  1.00 61.30           C  
ATOM   2351  O   VAL A 310      12.563  11.723 -16.727  1.00 60.25           O  
ATOM   2352  CB  VAL A 310      12.074  12.833 -13.548  1.00 58.76           C  
ATOM   2353  CG1 VAL A 310      10.840  11.977 -13.667  1.00 57.53           C  
ATOM   2354  CG2 VAL A 310      12.568  12.896 -12.105  1.00 58.21           C  
ATOM   2355  N   GLU A 311      12.659  13.923 -16.190  1.00 66.21           N  
ATOM   2356  CA  GLU A 311      12.283  14.435 -17.519  1.00 68.87           C  
ATOM   2357  C   GLU A 311      13.252  14.041 -18.629  1.00 68.91           C  
ATOM   2358  O   GLU A 311      12.842  13.963 -19.779  1.00 72.03           O  
ATOM   2359  CB  GLU A 311      12.111  15.969 -17.525  1.00 69.11           C  
ATOM   2360  CG  GLU A 311      10.656  16.390 -17.528  1.00 70.98           C  
ATOM   2361  CD  GLU A 311      10.441  17.671 -16.790  1.00 74.83           C  
ATOM   2362  OE1 GLU A 311      11.362  18.510 -16.817  1.00 76.37           O  
ATOM   2363  OE2 GLU A 311       9.358  17.848 -16.183  1.00 76.26           O  
ATOM   2364  N   SER A 312      14.514  13.780 -18.311  1.00 66.25           N  
ATOM   2365  CA  SER A 312      15.461  13.380 -19.341  1.00 62.48           C  
ATOM   2366  C   SER A 312      15.257  12.027 -19.983  1.00 62.51           C  
ATOM   2367  O   SER A 312      14.457  11.218 -19.541  1.00 62.98           O  
ATOM   2368  CB  SER A 312      16.877  13.369 -18.798  1.00 61.45           C  
ATOM   2369  OG  SER A 312      17.753  13.390 -19.896  1.00 57.39           O  
ATOM   2370  N   LYS A 313      16.050  11.775 -21.011  1.00 62.29           N  
ATOM   2371  CA  LYS A 313      16.060  10.519 -21.755  1.00 60.87           C  
ATOM   2372  C   LYS A 313      17.527  10.269 -21.518  1.00 59.93           C  
ATOM   2373  O   LYS A 313      18.183  11.139 -20.968  1.00 61.23           O  
ATOM   2374  CB  LYS A 313      15.788  10.823 -23.226  1.00 59.77           C  
ATOM   2375  N   ASP A 314      18.053   9.119 -21.905  1.00 56.52           N  
ATOM   2376  CA  ASP A 314      19.470   8.849 -21.667  1.00 55.84           C  
ATOM   2377  C   ASP A 314      19.773   8.774 -20.156  1.00 54.75           C  
ATOM   2378  O   ASP A 314      20.923   8.916 -19.737  1.00 56.76           O  
ATOM   2379  CB  ASP A 314      20.332   9.958 -22.309  1.00 52.12           C  
ATOM   2380  N   VAL A 315      18.738   8.553 -19.351  1.00 51.44           N  
ATOM   2381  CA  VAL A 315      18.900   8.459 -17.898  1.00 47.36           C  
ATOM   2382  C   VAL A 315      19.476   7.078 -17.612  1.00 45.00           C  
ATOM   2383  O   VAL A 315      20.469   6.931 -16.902  1.00 42.56           O  
ATOM   2384  CB  VAL A 315      17.520   8.628 -17.151  1.00 48.67           C  
ATOM   2385  CG1 VAL A 315      17.433   7.691 -15.961  1.00 44.85           C  
ATOM   2386  CG2 VAL A 315      17.322  10.077 -16.693  1.00 45.78           C  
ATOM   2387  N   CYS A 316      18.841   6.074 -18.202  1.00 43.55           N  
ATOM   2388  CA  CYS A 316      19.247   4.690 -18.050  1.00 42.80           C  
ATOM   2389  C   CYS A 316      20.655   4.451 -18.592  1.00 43.22           C  
ATOM   2390  O   CYS A 316      21.386   3.582 -18.107  1.00 42.79           O  
ATOM   2391  CB  CYS A 316      18.258   3.797 -18.780  1.00 42.27           C  
ATOM   2392  SG  CYS A 316      16.633   3.725 -17.976  1.00 43.79           S  
ATOM   2393  N   LYS A 317      21.032   5.218 -19.607  1.00 43.60           N  
ATOM   2394  CA  LYS A 317      22.353   5.076 -20.200  1.00 44.22           C  
ATOM   2395  C   LYS A 317      23.386   5.545 -19.191  1.00 44.39           C  
ATOM   2396  O   LYS A 317      24.393   4.874 -18.966  1.00 45.58           O  
ATOM   2397  CB  LYS A 317      22.461   5.905 -21.488  1.00 43.84           C  
ATOM   2398  N   ASN A 318      23.126   6.702 -18.584  1.00 44.94           N  
ATOM   2399  CA  ASN A 318      24.031   7.274 -17.590  1.00 42.97           C  
ATOM   2400  C   ASN A 318      24.033   6.430 -16.334  1.00 40.31           C  
ATOM   2401  O   ASN A 318      25.027   6.365 -15.614  1.00 37.47           O  
ATOM   2402  CB  ASN A 318      23.601   8.693 -17.243  1.00 44.67           C  
ATOM   2403  CG  ASN A 318      23.861   9.658 -18.365  1.00 47.59           C  
ATOM   2404  OD1 ASN A 318      22.948  10.322 -18.848  1.00 48.44           O  
ATOM   2405  ND2 ASN A 318      25.116   9.739 -18.797  1.00 49.74           N  
ATOM   2406  N   TYR A 319      22.903   5.789 -16.075  1.00 39.51           N  
ATOM   2407  CA  TYR A 319      22.771   4.939 -14.910  1.00 40.61           C  
ATOM   2408  C   TYR A 319      23.562   3.654 -15.121  1.00 43.17           C  
ATOM   2409  O   TYR A 319      24.461   3.342 -14.338  1.00 44.39           O  
ATOM   2410  CB  TYR A 319      21.298   4.608 -14.663  1.00 38.41           C  
ATOM   2411  CG  TYR A 319      21.068   3.647 -13.523  1.00 38.01           C  
ATOM   2412  CD1 TYR A 319      21.729   3.809 -12.300  1.00 37.94           C  
ATOM   2413  CD2 TYR A 319      20.189   2.576 -13.661  1.00 37.00           C  
ATOM   2414  CE1 TYR A 319      21.519   2.927 -11.246  1.00 37.64           C  
ATOM   2415  CE2 TYR A 319      19.970   1.688 -12.615  1.00 38.61           C  
ATOM   2416  CZ  TYR A 319      20.637   1.868 -11.411  1.00 38.51           C  
ATOM   2417  OH  TYR A 319      20.410   0.989 -10.377  1.00 36.55           O  
ATOM   2418  N   ALA A 320      23.234   2.919 -16.183  1.00 44.12           N  
ATOM   2419  CA  ALA A 320      23.903   1.655 -16.483  1.00 44.61           C  
ATOM   2420  C   ALA A 320      25.411   1.811 -16.656  1.00 45.97           C  
ATOM   2421  O   ALA A 320      26.172   0.879 -16.406  1.00 47.18           O  
ATOM   2422  CB  ALA A 320      23.298   1.033 -17.723  1.00 44.24           C  
ATOM   2423  N   GLU A 321      25.837   2.997 -17.071  1.00 47.64           N  
ATOM   2424  CA  GLU A 321      27.252   3.287 -17.277  1.00 49.35           C  
ATOM   2425  C   GLU A 321      28.074   3.231 -15.986  1.00 49.67           C  
ATOM   2426  O   GLU A 321      29.239   2.834 -16.001  1.00 50.23           O  
ATOM   2427  CB  GLU A 321      27.391   4.667 -17.902  1.00 52.32           C  
ATOM   2428  CG  GLU A 321      28.668   4.886 -18.663  1.00 58.97           C  
ATOM   2429  CD  GLU A 321      28.674   6.233 -19.339  1.00 62.77           C  
ATOM   2430  OE1 GLU A 321      29.099   7.213 -18.693  1.00 64.70           O  
ATOM   2431  OE2 GLU A 321      28.245   6.312 -20.511  1.00 65.35           O  
ATOM   2432  N   ALA A 322      27.463   3.648 -14.880  1.00 49.80           N  
ATOM   2433  CA  ALA A 322      28.105   3.659 -13.559  1.00 48.36           C  
ATOM   2434  C   ALA A 322      27.023   3.909 -12.502  1.00 46.99           C  
ATOM   2435  O   ALA A 322      26.893   5.022 -11.984  1.00 46.96           O  
ATOM   2436  CB  ALA A 322      29.161   4.753 -13.500  1.00 47.72           C  
ATOM   2437  N   LYS A 323      26.261   2.857 -12.198  1.00 44.28           N  
ATOM   2438  CA  LYS A 323      25.143   2.894 -11.247  1.00 43.76           C  
ATOM   2439  C   LYS A 323      25.334   3.661  -9.941  1.00 43.44           C  
ATOM   2440  O   LYS A 323      24.625   4.635  -9.669  1.00 42.86           O  
ATOM   2441  CB  LYS A 323      24.704   1.468 -10.914  1.00 41.21           C  
ATOM   2442  CG  LYS A 323      24.299   0.662 -12.120  1.00 41.55           C  
ATOM   2443  CD  LYS A 323      23.359  -0.462 -11.739  1.00 44.74           C  
ATOM   2444  CE  LYS A 323      22.972  -1.272 -12.963  1.00 45.88           C  
ATOM   2445  NZ  LYS A 323      21.868  -2.220 -12.670  1.00 49.06           N  
ATOM   2446  N   ASP A 324      26.274   3.211  -9.123  1.00 41.91           N  
ATOM   2447  CA  ASP A 324      26.516   3.865  -7.857  1.00 41.12           C  
ATOM   2448  C   ASP A 324      26.861   5.329  -8.012  1.00 40.65           C  
ATOM   2449  O   ASP A 324      26.347   6.166  -7.278  1.00 41.32           O  
ATOM   2450  CB  ASP A 324      27.621   3.143  -7.113  1.00 43.42           C  
ATOM   2451  CG  ASP A 324      27.118   1.906  -6.424  1.00 46.92           C  
ATOM   2452  OD1 ASP A 324      25.926   1.579  -6.629  1.00 45.33           O  
ATOM   2453  OD2 ASP A 324      27.902   1.268  -5.685  1.00 50.85           O  
ATOM   2454  N   VAL A 325      27.728   5.648  -8.965  1.00 40.03           N  
ATOM   2455  CA  VAL A 325      28.107   7.039  -9.177  1.00 38.15           C  
ATOM   2456  C   VAL A 325      26.899   7.868  -9.589  1.00 37.45           C  
ATOM   2457  O   VAL A 325      26.731   8.999  -9.136  1.00 38.53           O  
ATOM   2458  CB  VAL A 325      29.181   7.166 -10.258  1.00 39.43           C  
ATOM   2459  CG1 VAL A 325      29.590   8.622 -10.409  1.00 39.76           C  
ATOM   2460  CG2 VAL A 325      30.380   6.314  -9.890  1.00 39.61           C  
ATOM   2461  N   PHE A 326      26.057   7.308 -10.450  1.00 36.09           N  
ATOM   2462  CA  PHE A 326      24.868   8.025 -10.890  1.00 35.43           C  
ATOM   2463  C   PHE A 326      23.959   8.263  -9.687  1.00 38.01           C  
ATOM   2464  O   PHE A 326      23.497   9.386  -9.467  1.00 39.67           O  
ATOM   2465  CB  PHE A 326      24.111   7.232 -11.961  1.00 29.79           C  
ATOM   2466  CG  PHE A 326      22.969   7.994 -12.583  1.00 27.83           C  
ATOM   2467  CD1 PHE A 326      23.204   9.161 -13.306  1.00 26.49           C  
ATOM   2468  CD2 PHE A 326      21.659   7.548 -12.446  1.00 28.56           C  
ATOM   2469  CE1 PHE A 326      22.144   9.875 -13.889  1.00 25.08           C  
ATOM   2470  CE2 PHE A 326      20.592   8.255 -13.024  1.00 28.75           C  
ATOM   2471  CZ  PHE A 326      20.839   9.421 -13.747  1.00 25.94           C  
ATOM   2472  N   LEU A 327      23.712   7.204  -8.910  1.00 37.78           N  
ATOM   2473  CA  LEU A 327      22.862   7.296  -7.720  1.00 36.43           C  
ATOM   2474  C   LEU A 327      23.475   8.250  -6.689  1.00 36.61           C  
ATOM   2475  O   LEU A 327      22.763   8.992  -6.011  1.00 36.13           O  
ATOM   2476  CB  LEU A 327      22.658   5.909  -7.100  1.00 33.66           C  
ATOM   2477  CG  LEU A 327      21.629   5.031  -7.817  1.00 30.16           C  
ATOM   2478  CD1 LEU A 327      21.653   3.637  -7.249  1.00 28.04           C  
ATOM   2479  CD2 LEU A 327      20.252   5.636  -7.671  1.00 31.17           C  
ATOM   2480  N   GLY A 328      24.795   8.229  -6.572  1.00 36.00           N  
ATOM   2481  CA  GLY A 328      25.443   9.129  -5.642  1.00 38.61           C  
ATOM   2482  C   GLY A 328      25.172  10.548  -6.104  1.00 41.24           C  
ATOM   2483  O   GLY A 328      25.069  11.471  -5.292  1.00 42.33           O  
ATOM   2484  N   MET A 329      25.052  10.722  -7.420  1.00 41.84           N  
ATOM   2485  CA  MET A 329      24.788  12.031  -8.008  1.00 40.91           C  
ATOM   2486  C   MET A 329      23.375  12.473  -7.665  1.00 38.08           C  
ATOM   2487  O   MET A 329      23.124  13.655  -7.459  1.00 38.42           O  
ATOM   2488  CB  MET A 329      24.958  11.983  -9.528  1.00 44.71           C  
ATOM   2489  CG  MET A 329      26.050  12.900 -10.056  1.00 49.43           C  
ATOM   2490  SD  MET A 329      26.693  12.341 -11.650  1.00 57.17           S  
ATOM   2491  CE  MET A 329      28.371  11.857 -11.228  1.00 56.32           C  
ATOM   2492  N   PHE A 330      22.451  11.522  -7.622  1.00 35.72           N  
ATOM   2493  CA  PHE A 330      21.073  11.829  -7.273  1.00 36.18           C  
ATOM   2494  C   PHE A 330      21.039  12.300  -5.807  1.00 38.64           C  
ATOM   2495  O   PHE A 330      20.396  13.305  -5.474  1.00 38.22           O  
ATOM   2496  CB  PHE A 330      20.204  10.588  -7.445  1.00 34.47           C  
ATOM   2497  CG  PHE A 330      18.817  10.745  -6.901  1.00 38.30           C  
ATOM   2498  CD1 PHE A 330      17.853  11.447  -7.613  1.00 37.29           C  
ATOM   2499  CD2 PHE A 330      18.469  10.183  -5.674  1.00 40.37           C  
ATOM   2500  CE1 PHE A 330      16.560  11.588  -7.117  1.00 40.11           C  
ATOM   2501  CE2 PHE A 330      17.180  10.316  -5.165  1.00 41.45           C  
ATOM   2502  CZ  PHE A 330      16.221  11.021  -5.891  1.00 42.49           C  
ATOM   2503  N   LEU A 331      21.746  11.566  -4.944  1.00 35.97           N  
ATOM   2504  CA  LEU A 331      21.824  11.884  -3.523  1.00 33.38           C  
ATOM   2505  C   LEU A 331      22.403  13.274  -3.338  1.00 32.87           C  
ATOM   2506  O   LEU A 331      21.780  14.128  -2.714  1.00 31.81           O  
ATOM   2507  CB  LEU A 331      22.720  10.883  -2.793  1.00 35.97           C  
ATOM   2508  CG  LEU A 331      22.099   9.706  -2.041  1.00 34.05           C  
ATOM   2509  CD1 LEU A 331      23.099   9.201  -1.017  1.00 30.24           C  
ATOM   2510  CD2 LEU A 331      20.811  10.132  -1.370  1.00 33.80           C  
ATOM   2511  N   TYR A 332      23.604  13.489  -3.869  1.00 30.16           N  
ATOM   2512  CA  TYR A 332      24.264  14.785  -3.775  1.00 31.98           C  
ATOM   2513  C   TYR A 332      23.339  15.897  -4.279  1.00 33.61           C  
ATOM   2514  O   TYR A 332      23.270  16.980  -3.699  1.00 36.75           O  
ATOM   2515  CB  TYR A 332      25.558  14.765  -4.592  1.00 32.81           C  
ATOM   2516  CG  TYR A 332      26.041  16.119  -5.073  1.00 35.31           C  
ATOM   2517  CD1 TYR A 332      26.809  16.933  -4.248  1.00 37.39           C  
ATOM   2518  CD2 TYR A 332      25.760  16.569  -6.369  1.00 36.29           C  
ATOM   2519  CE1 TYR A 332      27.293  18.161  -4.696  1.00 42.64           C  
ATOM   2520  CE2 TYR A 332      26.239  17.794  -6.828  1.00 36.41           C  
ATOM   2521  CZ  TYR A 332      27.007  18.585  -5.987  1.00 40.89           C  
ATOM   2522  OH  TYR A 332      27.506  19.794  -6.427  1.00 43.61           O  
ATOM   2523  N   GLU A 333      22.613  15.624  -5.352  1.00 32.96           N  
ATOM   2524  CA  GLU A 333      21.719  16.622  -5.904  1.00 34.90           C  
ATOM   2525  C   GLU A 333      20.550  16.864  -4.961  1.00 36.09           C  
ATOM   2526  O   GLU A 333      20.286  18.002  -4.577  1.00 39.39           O  
ATOM   2527  CB  GLU A 333      21.212  16.183  -7.283  1.00 35.59           C  
ATOM   2528  CG  GLU A 333      22.187  16.450  -8.436  1.00 39.63           C  
ATOM   2529  CD  GLU A 333      22.785  17.855  -8.417  1.00 42.10           C  
ATOM   2530  OE1 GLU A 333      22.100  18.793  -7.951  1.00 41.06           O  
ATOM   2531  OE2 GLU A 333      23.943  18.019  -8.872  1.00 44.13           O  
ATOM   2532  N   TYR A 334      19.851  15.797  -4.587  1.00 35.19           N  
ATOM   2533  CA  TYR A 334      18.713  15.910  -3.684  1.00 34.03           C  
ATOM   2534  C   TYR A 334      19.108  16.388  -2.273  1.00 34.04           C  
ATOM   2535  O   TYR A 334      18.366  17.128  -1.628  1.00 33.90           O  
ATOM   2536  CB  TYR A 334      18.002  14.562  -3.590  1.00 34.63           C  
ATOM   2537  CG  TYR A 334      16.498  14.662  -3.536  1.00 38.92           C  
ATOM   2538  CD1 TYR A 334      15.858  15.351  -2.505  1.00 40.11           C  
ATOM   2539  CD2 TYR A 334      15.710  14.071  -4.521  1.00 43.04           C  
ATOM   2540  CE1 TYR A 334      14.463  15.449  -2.457  1.00 43.35           C  
ATOM   2541  CE2 TYR A 334      14.313  14.160  -4.487  1.00 46.27           C  
ATOM   2542  CZ  TYR A 334      13.693  14.852  -3.453  1.00 46.68           C  
ATOM   2543  OH  TYR A 334      12.311  14.949  -3.428  1.00 46.47           O  
ATOM   2544  N   ALA A 335      20.285  15.983  -1.806  1.00 32.15           N  
ATOM   2545  CA  ALA A 335      20.741  16.350  -0.473  1.00 31.86           C  
ATOM   2546  C   ALA A 335      21.061  17.827  -0.283  1.00 34.35           C  
ATOM   2547  O   ALA A 335      20.646  18.413   0.714  1.00 35.91           O  
ATOM   2548  CB  ALA A 335      21.949  15.509  -0.083  1.00 28.81           C  
ATOM   2549  N   ARG A 336      21.797  18.434  -1.213  1.00 34.89           N  
ATOM   2550  CA  ARG A 336      22.146  19.852  -1.070  1.00 36.09           C  
ATOM   2551  C   ARG A 336      20.941  20.772  -1.204  1.00 36.87           C  
ATOM   2552  O   ARG A 336      21.006  21.951  -0.865  1.00 36.93           O  
ATOM   2553  CB  ARG A 336      23.202  20.259  -2.091  1.00 36.62           C  
ATOM   2554  CG  ARG A 336      22.805  20.030  -3.540  1.00 39.83           C  
ATOM   2555  CD  ARG A 336      24.052  19.819  -4.383  1.00 42.14           C  
ATOM   2556  NE  ARG A 336      23.916  20.357  -5.731  1.00 46.30           N  
ATOM   2557  CZ  ARG A 336      24.642  21.363  -6.208  1.00 47.00           C  
ATOM   2558  NH1 ARG A 336      25.559  21.937  -5.445  1.00 46.42           N  
ATOM   2559  NH2 ARG A 336      24.459  21.788  -7.450  1.00 46.31           N  
ATOM   2560  N   ARG A 337      19.839  20.225  -1.695  1.00 38.14           N  
ATOM   2561  CA  ARG A 337      18.619  20.993  -1.863  1.00 40.57           C  
ATOM   2562  C   ARG A 337      17.737  20.797  -0.635  1.00 40.87           C  
ATOM   2563  O   ARG A 337      16.728  21.474  -0.474  1.00 42.21           O  
ATOM   2564  CB  ARG A 337      17.863  20.512  -3.107  1.00 44.23           C  
ATOM   2565  CG  ARG A 337      18.349  21.096  -4.423  1.00 48.45           C  
ATOM   2566  CD  ARG A 337      17.516  20.572  -5.589  1.00 51.81           C  
ATOM   2567  NE  ARG A 337      18.111  20.921  -6.873  1.00 53.20           N  
ATOM   2568  CZ  ARG A 337      19.229  20.379  -7.345  1.00 54.75           C  
ATOM   2569  NH1 ARG A 337      19.873  19.467  -6.631  1.00 54.18           N  
ATOM   2570  NH2 ARG A 337      19.713  20.756  -8.524  1.00 53.56           N  
ATOM   2571  N   HIS A 338      18.118  19.867   0.232  1.00 40.90           N  
ATOM   2572  CA  HIS A 338      17.311  19.589   1.414  1.00 39.40           C  
ATOM   2573  C   HIS A 338      18.065  19.362   2.712  1.00 37.82           C  
ATOM   2574  O   HIS A 338      18.201  18.225   3.172  1.00 38.32           O  
ATOM   2575  CB  HIS A 338      16.423  18.380   1.156  1.00 37.39           C  
ATOM   2576  CG  HIS A 338      15.264  18.671   0.263  1.00 38.58           C  
ATOM   2577  ND1 HIS A 338      14.121  19.295   0.716  1.00 40.55           N  
ATOM   2578  CD2 HIS A 338      15.060  18.414  -1.049  1.00 39.36           C  
ATOM   2579  CE1 HIS A 338      13.260  19.406  -0.285  1.00 40.10           C  
ATOM   2580  NE2 HIS A 338      13.807  18.880  -1.363  1.00 40.28           N  
ATOM   2581  N   PRO A 339      18.586  20.438   3.314  1.00 34.68           N  
ATOM   2582  CA  PRO A 339      19.309  20.267   4.577  1.00 33.36           C  
ATOM   2583  C   PRO A 339      18.298  20.063   5.714  1.00 32.76           C  
ATOM   2584  O   PRO A 339      18.670  19.802   6.849  1.00 33.48           O  
ATOM   2585  CB  PRO A 339      20.091  21.564   4.720  1.00 30.50           C  
ATOM   2586  CG  PRO A 339      19.285  22.562   3.961  1.00 31.65           C  
ATOM   2587  CD  PRO A 339      18.570  21.836   2.860  1.00 30.94           C  
ATOM   2588  N   ASP A 340      17.016  20.180   5.376  1.00 33.21           N  
ATOM   2589  CA  ASP A 340      15.909  20.020   6.320  1.00 35.79           C  
ATOM   2590  C   ASP A 340      15.388  18.578   6.373  1.00 36.09           C  
ATOM   2591  O   ASP A 340      14.369  18.298   7.007  1.00 37.05           O  
ATOM   2592  CB  ASP A 340      14.752  20.943   5.922  1.00 36.21           C  
ATOM   2593  CG  ASP A 340      14.208  20.623   4.536  1.00 41.58           C  
ATOM   2594  OD1 ASP A 340      15.018  20.238   3.661  1.00 47.19           O  
ATOM   2595  OD2 ASP A 340      12.980  20.746   4.310  1.00 40.53           O  
ATOM   2596  N   TYR A 341      16.068  17.670   5.684  1.00 35.11           N  
ATOM   2597  CA  TYR A 341      15.670  16.266   5.670  1.00 31.54           C  
ATOM   2598  C   TYR A 341      16.661  15.509   6.543  1.00 29.06           C  
ATOM   2599  O   TYR A 341      17.780  15.979   6.757  1.00 26.21           O  
ATOM   2600  CB  TYR A 341      15.745  15.699   4.246  1.00 33.93           C  
ATOM   2601  CG  TYR A 341      14.556  15.995   3.361  1.00 38.13           C  
ATOM   2602  CD1 TYR A 341      13.566  16.896   3.757  1.00 40.37           C  
ATOM   2603  CD2 TYR A 341      14.424  15.379   2.112  1.00 37.49           C  
ATOM   2604  CE1 TYR A 341      12.470  17.180   2.929  1.00 40.05           C  
ATOM   2605  CE2 TYR A 341      13.332  15.657   1.275  1.00 37.31           C  
ATOM   2606  CZ  TYR A 341      12.361  16.558   1.692  1.00 39.18           C  
ATOM   2607  OH  TYR A 341      11.280  16.840   0.884  1.00 38.31           O  
ATOM   2608  N   SER A 342      16.256  14.352   7.062  1.00 26.26           N  
ATOM   2609  CA  SER A 342      17.176  13.545   7.857  1.00 26.67           C  
ATOM   2610  C   SER A 342      18.014  12.817   6.804  1.00 26.92           C  
ATOM   2611  O   SER A 342      17.570  12.668   5.668  1.00 27.92           O  
ATOM   2612  CB  SER A 342      16.410  12.528   8.703  1.00 28.00           C  
ATOM   2613  OG  SER A 342      15.614  11.685   7.888  1.00 25.64           O  
ATOM   2614  N   VAL A 343      19.215  12.371   7.150  1.00 26.41           N  
ATOM   2615  CA  VAL A 343      20.027  11.671   6.163  1.00 26.67           C  
ATOM   2616  C   VAL A 343      19.361  10.371   5.706  1.00 29.84           C  
ATOM   2617  O   VAL A 343      19.405  10.036   4.520  1.00 32.40           O  
ATOM   2618  CB  VAL A 343      21.436  11.346   6.695  1.00 26.25           C  
ATOM   2619  CG1 VAL A 343      22.173  10.476   5.690  1.00 24.26           C  
ATOM   2620  CG2 VAL A 343      22.212  12.632   6.942  1.00 24.24           C  
ATOM   2621  N   VAL A 344      18.732   9.646   6.629  1.00 29.19           N  
ATOM   2622  CA  VAL A 344      18.079   8.393   6.263  1.00 29.08           C  
ATOM   2623  C   VAL A 344      16.834   8.617   5.419  1.00 29.11           C  
ATOM   2624  O   VAL A 344      16.377   7.702   4.738  1.00 32.91           O  
ATOM   2625  CB  VAL A 344      17.692   7.572   7.493  1.00 29.54           C  
ATOM   2626  CG1 VAL A 344      18.940   7.208   8.276  1.00 29.78           C  
ATOM   2627  CG2 VAL A 344      16.729   8.363   8.351  1.00 30.74           C  
ATOM   2628  N   LEU A 345      16.264   9.816   5.465  1.00 27.95           N  
ATOM   2629  CA  LEU A 345      15.091  10.084   4.632  1.00 26.32           C  
ATOM   2630  C   LEU A 345      15.606  10.237   3.207  1.00 26.14           C  
ATOM   2631  O   LEU A 345      14.947   9.825   2.255  1.00 26.71           O  
ATOM   2632  CB  LEU A 345      14.367  11.371   5.049  1.00 21.13           C  
ATOM   2633  CG  LEU A 345      13.381  11.887   3.990  1.00 19.10           C  
ATOM   2634  CD1 LEU A 345      12.316  10.836   3.724  1.00 19.40           C  
ATOM   2635  CD2 LEU A 345      12.735  13.188   4.445  1.00 19.73           C  
ATOM   2636  N   LEU A 346      16.788  10.833   3.076  1.00 25.92           N  
ATOM   2637  CA  LEU A 346      17.412  11.027   1.774  1.00 28.58           C  
ATOM   2638  C   LEU A 346      17.773   9.667   1.173  1.00 30.58           C  
ATOM   2639  O   LEU A 346      17.475   9.395   0.011  1.00 30.23           O  
ATOM   2640  CB  LEU A 346      18.669  11.881   1.918  1.00 27.63           C  
ATOM   2641  CG  LEU A 346      18.402  13.371   2.116  1.00 27.50           C  
ATOM   2642  CD1 LEU A 346      19.694  14.047   2.508  1.00 28.34           C  
ATOM   2643  CD2 LEU A 346      17.832  13.990   0.839  1.00 25.82           C  
ATOM   2644  N   LEU A 347      18.417   8.819   1.974  1.00 31.90           N  
ATOM   2645  CA  LEU A 347      18.791   7.480   1.532  1.00 30.79           C  
ATOM   2646  C   LEU A 347      17.517   6.718   1.168  1.00 31.64           C  
ATOM   2647  O   LEU A 347      17.516   5.888   0.260  1.00 31.65           O  
ATOM   2648  CB  LEU A 347      19.531   6.729   2.644  1.00 26.74           C  
ATOM   2649  CG  LEU A 347      20.784   7.355   3.255  1.00 28.70           C  
ATOM   2650  CD1 LEU A 347      21.236   6.497   4.423  1.00 31.33           C  
ATOM   2651  CD2 LEU A 347      21.889   7.468   2.230  1.00 29.64           C  
ATOM   2652  N   ARG A 348      16.435   7.002   1.886  1.00 32.72           N  
ATOM   2653  CA  ARG A 348      15.156   6.348   1.632  1.00 35.12           C  
ATOM   2654  C   ARG A 348      14.652   6.709   0.242  1.00 36.55           C  
ATOM   2655  O   ARG A 348      13.960   5.923  -0.412  1.00 37.73           O  
ATOM   2656  CB  ARG A 348      14.122   6.782   2.670  1.00 35.56           C  
ATOM   2657  CG  ARG A 348      13.752   5.697   3.649  1.00 35.10           C  
ATOM   2658  CD  ARG A 348      12.887   6.229   4.779  1.00 36.28           C  
ATOM   2659  NE  ARG A 348      13.501   5.993   6.080  1.00 34.21           N  
ATOM   2660  CZ  ARG A 348      13.339   6.781   7.135  1.00 33.11           C  
ATOM   2661  NH1 ARG A 348      12.570   7.861   7.050  1.00 29.55           N  
ATOM   2662  NH2 ARG A 348      13.953   6.491   8.272  1.00 36.30           N  
ATOM   2663  N   LEU A 349      14.999   7.912  -0.198  1.00 37.29           N  
ATOM   2664  CA  LEU A 349      14.587   8.388  -1.508  1.00 37.85           C  
ATOM   2665  C   LEU A 349      15.502   7.799  -2.572  1.00 37.89           C  
ATOM   2666  O   LEU A 349      15.039   7.346  -3.612  1.00 41.10           O  
ATOM   2667  CB  LEU A 349      14.631   9.921  -1.552  1.00 36.70           C  
ATOM   2668  CG  LEU A 349      13.698  10.636  -0.563  1.00 36.92           C  
ATOM   2669  CD1 LEU A 349      13.629  12.120  -0.892  1.00 34.80           C  
ATOM   2670  CD2 LEU A 349      12.311  10.003  -0.608  1.00 33.27           C  
ATOM   2671  N   ALA A 350      16.800   7.795  -2.304  1.00 36.93           N  
ATOM   2672  CA  ALA A 350      17.755   7.252  -3.250  1.00 36.21           C  
ATOM   2673  C   ALA A 350      17.428   5.794  -3.525  1.00 37.20           C  
ATOM   2674  O   ALA A 350      17.492   5.340  -4.669  1.00 39.05           O  
ATOM   2675  CB  ALA A 350      19.162   7.376  -2.704  1.00 35.37           C  
ATOM   2676  N   LYS A 351      17.066   5.063  -2.478  1.00 36.66           N  
ATOM   2677  CA  LYS A 351      16.748   3.654  -2.635  1.00 38.53           C  
ATOM   2678  C   LYS A 351      15.495   3.471  -3.473  1.00 39.77           C  
ATOM   2679  O   LYS A 351      15.440   2.575  -4.309  1.00 41.61           O  
ATOM   2680  CB  LYS A 351      16.574   2.981  -1.271  1.00 38.74           C  
ATOM   2681  CG  LYS A 351      16.578   1.462  -1.339  1.00 40.41           C  
ATOM   2682  CD  LYS A 351      16.510   0.848   0.047  1.00 39.83           C  
ATOM   2683  N   THR A 352      14.491   4.317  -3.257  1.00 41.25           N  
ATOM   2684  CA  THR A 352      13.245   4.233  -4.021  1.00 43.15           C  
ATOM   2685  C   THR A 352      13.535   4.528  -5.498  1.00 45.11           C  
ATOM   2686  O   THR A 352      12.946   3.923  -6.400  1.00 46.30           O  
ATOM   2687  CB  THR A 352      12.190   5.241  -3.477  1.00 43.10           C  
ATOM   2688  OG1 THR A 352      11.379   4.596  -2.493  1.00 44.71           O  
ATOM   2689  CG2 THR A 352      11.282   5.748  -4.589  1.00 44.89           C  
ATOM   2690  N   TYR A 353      14.447   5.468  -5.729  1.00 45.24           N  
ATOM   2691  CA  TYR A 353      14.846   5.860  -7.075  1.00 45.30           C  
ATOM   2692  C   TYR A 353      15.565   4.688  -7.736  1.00 45.32           C  
ATOM   2693  O   TYR A 353      15.239   4.296  -8.859  1.00 45.22           O  
ATOM   2694  CB  TYR A 353      15.785   7.067  -7.008  1.00 44.83           C  
ATOM   2695  CG  TYR A 353      16.164   7.652  -8.352  1.00 44.08           C  
ATOM   2696  CD1 TYR A 353      15.191   7.969  -9.300  1.00 42.49           C  
ATOM   2697  CD2 TYR A 353      17.498   7.922  -8.664  1.00 47.00           C  
ATOM   2698  CE1 TYR A 353      15.535   8.541 -10.519  1.00 42.36           C  
ATOM   2699  CE2 TYR A 353      17.852   8.495  -9.882  1.00 45.35           C  
ATOM   2700  CZ  TYR A 353      16.865   8.803 -10.801  1.00 43.51           C  
ATOM   2701  OH  TYR A 353      17.211   9.390 -11.990  1.00 45.91           O  
ATOM   2702  N   GLU A 354      16.542   4.134  -7.024  1.00 43.77           N  
ATOM   2703  CA  GLU A 354      17.314   3.004  -7.518  1.00 43.59           C  
ATOM   2704  C   GLU A 354      16.391   1.858  -7.916  1.00 43.53           C  
ATOM   2705  O   GLU A 354      16.578   1.224  -8.952  1.00 45.27           O  
ATOM   2706  CB  GLU A 354      18.297   2.535  -6.441  1.00 43.17           C  
ATOM   2707  CG  GLU A 354      18.463   1.031  -6.348  1.00 43.16           C  
ATOM   2708  CD  GLU A 354      19.565   0.628  -5.391  1.00 45.11           C  
ATOM   2709  OE1 GLU A 354      19.342   0.697  -4.164  1.00 47.79           O  
ATOM   2710  OE2 GLU A 354      20.656   0.241  -5.860  1.00 46.36           O  
ATOM   2711  N   THR A 355      15.384   1.609  -7.092  1.00 43.54           N  
ATOM   2712  CA  THR A 355      14.440   0.536  -7.347  1.00 43.50           C  
ATOM   2713  C   THR A 355      13.626   0.710  -8.626  1.00 45.77           C  
ATOM   2714  O   THR A 355      13.445  -0.254  -9.379  1.00 47.50           O  
ATOM   2715  CB  THR A 355      13.480   0.363  -6.158  1.00 41.13           C  
ATOM   2716  OG1 THR A 355      14.205  -0.184  -5.055  1.00 41.65           O  
ATOM   2717  CG2 THR A 355      12.339  -0.577  -6.511  1.00 37.42           C  
ATOM   2718  N   THR A 356      13.120   1.916  -8.876  1.00 45.16           N  
ATOM   2719  CA  THR A 356      12.338   2.124 -10.087  1.00 45.28           C  
ATOM   2720  C   THR A 356      13.253   2.062 -11.315  1.00 45.13           C  
ATOM   2721  O   THR A 356      12.879   1.481 -12.334  1.00 45.29           O  
ATOM   2722  CB  THR A 356      11.561   3.469 -10.058  1.00 43.68           C  
ATOM   2723  OG1 THR A 356      12.475   4.555  -9.909  1.00 46.43           O  
ATOM   2724  CG2 THR A 356      10.582   3.487  -8.901  1.00 45.73           C  
ATOM   2725  N   LEU A 357      14.457   2.632 -11.214  1.00 43.64           N  
ATOM   2726  CA  LEU A 357      15.408   2.607 -12.328  1.00 40.79           C  
ATOM   2727  C   LEU A 357      15.664   1.164 -12.748  1.00 42.98           C  
ATOM   2728  O   LEU A 357      15.638   0.836 -13.932  1.00 45.69           O  
ATOM   2729  CB  LEU A 357      16.733   3.266 -11.933  1.00 33.37           C  
ATOM   2730  CG  LEU A 357      16.783   4.792 -12.023  1.00 31.56           C  
ATOM   2731  CD1 LEU A 357      18.194   5.235 -12.299  1.00 28.25           C  
ATOM   2732  CD2 LEU A 357      15.855   5.286 -13.113  1.00 31.25           C  
ATOM   2733  N   GLU A 358      15.903   0.297 -11.773  1.00 42.55           N  
ATOM   2734  CA  GLU A 358      16.147  -1.100 -12.071  1.00 44.51           C  
ATOM   2735  C   GLU A 358      14.989  -1.755 -12.820  1.00 48.05           C  
ATOM   2736  O   GLU A 358      15.207  -2.617 -13.669  1.00 51.05           O  
ATOM   2737  CB  GLU A 358      16.416  -1.863 -10.784  1.00 42.40           C  
ATOM   2738  CG  GLU A 358      17.753  -1.529 -10.173  1.00 42.62           C  
ATOM   2739  CD  GLU A 358      18.900  -2.217 -10.878  1.00 41.64           C  
ATOM   2740  OE1 GLU A 358      18.796  -3.434 -11.142  1.00 42.27           O  
ATOM   2741  OE2 GLU A 358      19.908  -1.538 -11.167  1.00 40.20           O  
ATOM   2742  N   LYS A 359      13.760  -1.346 -12.518  1.00 51.47           N  
ATOM   2743  CA  LYS A 359      12.588  -1.930 -13.168  1.00 54.70           C  
ATOM   2744  C   LYS A 359      12.263  -1.278 -14.501  1.00 55.73           C  
ATOM   2745  O   LYS A 359      11.961  -1.955 -15.480  1.00 56.12           O  
ATOM   2746  CB  LYS A 359      11.362  -1.828 -12.250  1.00 55.70           C  
ATOM   2747  CG  LYS A 359      10.046  -1.601 -12.991  1.00 60.93           C  
ATOM   2748  CD  LYS A 359       8.865  -1.563 -12.033  1.00 65.80           C  
ATOM   2749  CE  LYS A 359       8.550  -0.134 -11.602  1.00 69.11           C  
ATOM   2750  NZ  LYS A 359       7.454  -0.076 -10.591  1.00 71.00           N  
ATOM   2751  N   CYS A 360      12.328   0.045 -14.532  1.00 56.89           N  
ATOM   2752  CA  CYS A 360      12.008   0.793 -15.736  1.00 57.54           C  
ATOM   2753  C   CYS A 360      13.049   0.714 -16.835  1.00 55.77           C  
ATOM   2754  O   CYS A 360      12.700   0.631 -18.008  1.00 55.63           O  
ATOM   2755  CB  CYS A 360      11.741   2.253 -15.370  1.00 59.33           C  
ATOM   2756  SG  CYS A 360      10.231   2.433 -14.373  1.00 64.18           S  
ATOM   2757  N   CYS A 361      14.324   0.754 -16.469  1.00 54.31           N  
ATOM   2758  CA  CYS A 361      15.376   0.692 -17.471  1.00 54.54           C  
ATOM   2759  C   CYS A 361      15.339  -0.650 -18.193  1.00 57.19           C  
ATOM   2760  O   CYS A 361      15.964  -0.826 -19.240  1.00 57.40           O  
ATOM   2761  CB  CYS A 361      16.737   0.902 -16.821  1.00 49.44           C  
ATOM   2762  SG  CYS A 361      17.030   2.625 -16.320  1.00 48.98           S  
ATOM   2763  N   ALA A 362      14.589  -1.590 -17.633  1.00 59.75           N  
ATOM   2764  CA  ALA A 362      14.472  -2.907 -18.230  1.00 63.66           C  
ATOM   2765  C   ALA A 362      13.163  -3.052 -19.000  1.00 66.68           C  
ATOM   2766  O   ALA A 362      13.004  -3.998 -19.770  1.00 69.61           O  
ATOM   2767  CB  ALA A 362      14.571  -3.982 -17.153  1.00 62.19           C  
ATOM   2768  N   ALA A 363      12.232  -2.119 -18.800  1.00 68.96           N  
ATOM   2769  CA  ALA A 363      10.932  -2.163 -19.481  1.00 70.64           C  
ATOM   2770  C   ALA A 363      10.919  -1.450 -20.841  1.00 71.32           C  
ATOM   2771  O   ALA A 363      11.757  -0.594 -21.115  1.00 71.07           O  
ATOM   2772  CB  ALA A 363       9.851  -1.586 -18.580  1.00 71.52           C  
ATOM   2773  N   ALA A 364       9.943  -1.810 -21.676  1.00 73.06           N  
ATOM   2774  CA  ALA A 364       9.778  -1.276 -23.038  1.00 73.88           C  
ATOM   2775  C   ALA A 364      10.103   0.200 -23.271  1.00 73.82           C  
ATOM   2776  O   ALA A 364      11.081   0.524 -23.942  1.00 74.11           O  
ATOM   2777  CB  ALA A 364       8.371  -1.567 -23.527  1.00 74.19           C  
ATOM   2778  N   ASP A 365       9.258   1.092 -22.762  1.00 74.32           N  
ATOM   2779  CA  ASP A 365       9.498   2.525 -22.903  1.00 74.03           C  
ATOM   2780  C   ASP A 365       9.947   3.083 -21.550  1.00 75.36           C  
ATOM   2781  O   ASP A 365       9.145   3.629 -20.782  1.00 74.73           O  
ATOM   2782  CB  ASP A 365       8.236   3.263 -23.381  1.00 72.51           C  
ATOM   2783  CG  ASP A 365       8.520   4.703 -23.838  1.00 71.23           C  
ATOM   2784  OD1 ASP A 365       9.688   5.154 -23.809  1.00 68.63           O  
ATOM   2785  OD2 ASP A 365       7.559   5.392 -24.232  1.00 71.45           O  
ATOM   2786  N   PRO A 366      11.253   2.942 -21.243  1.00 75.69           N  
ATOM   2787  CA  PRO A 366      11.839   3.422 -19.989  1.00 75.48           C  
ATOM   2788  C   PRO A 366      11.305   4.795 -19.554  1.00 75.27           C  
ATOM   2789  O   PRO A 366      10.493   4.897 -18.634  1.00 74.27           O  
ATOM   2790  CB  PRO A 366      13.339   3.473 -20.300  1.00 75.51           C  
ATOM   2791  CG  PRO A 366      13.552   2.433 -21.336  1.00 74.23           C  
ATOM   2792  CD  PRO A 366      12.259   2.307 -22.114  1.00 75.29           C  
ATOM   2793  N   HIS A 367      11.765   5.837 -20.238  1.00 75.93           N  
ATOM   2794  CA  HIS A 367      11.390   7.218 -19.937  1.00 75.91           C  
ATOM   2795  C   HIS A 367       9.974   7.430 -19.438  1.00 73.37           C  
ATOM   2796  O   HIS A 367       9.708   8.328 -18.637  1.00 73.00           O  
ATOM   2797  CB  HIS A 367      11.597   8.113 -21.154  1.00 79.58           C  
ATOM   2798  CG  HIS A 367      11.314   9.550 -20.876  1.00 83.77           C  
ATOM   2799  ND1 HIS A 367      12.286  10.439 -20.464  1.00 86.34           N  
ATOM   2800  CD2 HIS A 367      10.145  10.245 -20.872  1.00 84.93           C  
ATOM   2801  CE1 HIS A 367      11.731  11.609 -20.219  1.00 87.75           C  
ATOM   2802  NE2 HIS A 367      10.440  11.522 -20.456  1.00 87.46           N  
ATOM   2803  N   GLU A 368       9.060   6.617 -19.934  1.00 71.32           N  
ATOM   2804  CA  GLU A 368       7.678   6.742 -19.531  1.00 71.96           C  
ATOM   2805  C   GLU A 368       7.390   5.930 -18.282  1.00 69.73           C  
ATOM   2806  O   GLU A 368       6.525   6.293 -17.493  1.00 69.75           O  
ATOM   2807  CB  GLU A 368       6.762   6.292 -20.663  1.00 76.74           C  
ATOM   2808  CG  GLU A 368       6.999   7.024 -21.974  1.00 82.72           C  
ATOM   2809  CD  GLU A 368       6.654   8.502 -21.905  1.00 86.06           C  
ATOM   2810  OE1 GLU A 368       5.532   8.837 -21.460  1.00 86.79           O  
ATOM   2811  OE2 GLU A 368       7.507   9.328 -22.301  1.00 88.36           O  
ATOM   2812  N   CYS A 369       8.113   4.831 -18.107  1.00 68.27           N  
ATOM   2813  CA  CYS A 369       7.923   3.975 -16.940  1.00 66.87           C  
ATOM   2814  C   CYS A 369       8.243   4.727 -15.643  1.00 65.07           C  
ATOM   2815  O   CYS A 369       7.465   4.714 -14.683  1.00 63.80           O  
ATOM   2816  CB  CYS A 369       8.817   2.728 -17.045  1.00 66.58           C  
ATOM   2817  SG  CYS A 369       8.821   1.648 -15.563  1.00 65.82           S  
ATOM   2818  N   TYR A 370       9.392   5.390 -15.631  1.00 62.43           N  
ATOM   2819  CA  TYR A 370       9.832   6.141 -14.468  1.00 60.42           C  
ATOM   2820  C   TYR A 370       9.409   7.610 -14.498  1.00 60.58           C  
ATOM   2821  O   TYR A 370       9.992   8.450 -13.813  1.00 60.42           O  
ATOM   2822  CB  TYR A 370      11.352   6.048 -14.369  1.00 59.61           C  
ATOM   2823  CG  TYR A 370      12.120   6.649 -15.531  1.00 56.31           C  
ATOM   2824  CD1 TYR A 370      12.076   8.022 -15.799  1.00 54.37           C  
ATOM   2825  CD2 TYR A 370      12.973   5.862 -16.311  1.00 54.82           C  
ATOM   2826  CE1 TYR A 370      12.862   8.593 -16.789  1.00 53.69           C  
ATOM   2827  CE2 TYR A 370      13.774   6.427 -17.307  1.00 52.85           C  
ATOM   2828  CZ  TYR A 370      13.715   7.796 -17.538  1.00 54.17           C  
ATOM   2829  OH  TYR A 370      14.500   8.356 -18.525  1.00 55.58           O  
ATOM   2830  N   ALA A 371       8.391   7.915 -15.291  1.00 60.73           N  
ATOM   2831  CA  ALA A 371       7.906   9.285 -15.425  1.00 58.81           C  
ATOM   2832  C   ALA A 371       7.432   9.895 -14.107  1.00 57.85           C  
ATOM   2833  O   ALA A 371       7.873  10.979 -13.725  1.00 56.88           O  
ATOM   2834  CB  ALA A 371       6.782   9.337 -16.459  1.00 58.45           C  
ATOM   2835  N   LYS A 372       6.537   9.200 -13.413  1.00 56.46           N  
ATOM   2836  CA  LYS A 372       6.010   9.704 -12.151  1.00 56.00           C  
ATOM   2837  C   LYS A 372       6.770   9.147 -10.947  1.00 55.10           C  
ATOM   2838  O   LYS A 372       6.170   8.564 -10.046  1.00 56.63           O  
ATOM   2839  CB  LYS A 372       4.520   9.355 -12.042  1.00 56.36           C  
ATOM   2840  N   VAL A 373       8.087   9.336 -10.922  1.00 54.13           N  
ATOM   2841  CA  VAL A 373       8.904   8.826  -9.819  1.00 53.72           C  
ATOM   2842  C   VAL A 373       8.863   9.707  -8.567  1.00 54.01           C  
ATOM   2843  O   VAL A 373       8.820   9.196  -7.449  1.00 53.63           O  
ATOM   2844  CB  VAL A 373      10.385   8.614 -10.268  1.00 52.80           C  
ATOM   2845  CG1 VAL A 373      11.313   9.588  -9.565  1.00 52.85           C  
ATOM   2846  CG2 VAL A 373      10.809   7.190  -9.966  1.00 52.75           C  
ATOM   2847  N   PHE A 374       8.878  11.024  -8.757  1.00 53.53           N  
ATOM   2848  CA  PHE A 374       8.834  11.966  -7.641  1.00 52.85           C  
ATOM   2849  C   PHE A 374       7.487  11.909  -6.914  1.00 54.02           C  
ATOM   2850  O   PHE A 374       7.351  12.401  -5.794  1.00 53.99           O  
ATOM   2851  CB  PHE A 374       9.079  13.387  -8.148  1.00 51.24           C  
ATOM   2852  CG  PHE A 374      10.520  13.692  -8.438  1.00 52.76           C  
ATOM   2853  CD1 PHE A 374      11.454  12.674  -8.562  1.00 54.51           C  
ATOM   2854  CD2 PHE A 374      10.945  15.007  -8.597  1.00 54.43           C  
ATOM   2855  CE1 PHE A 374      12.791  12.959  -8.842  1.00 55.99           C  
ATOM   2856  CE2 PHE A 374      12.277  15.302  -8.877  1.00 54.27           C  
ATOM   2857  CZ  PHE A 374      13.201  14.277  -9.000  1.00 54.35           C  
ATOM   2858  N   ASP A 375       6.488  11.319  -7.560  1.00 54.38           N  
ATOM   2859  CA  ASP A 375       5.171  11.200  -6.959  1.00 56.14           C  
ATOM   2860  C   ASP A 375       5.272  10.160  -5.855  1.00 56.16           C  
ATOM   2861  O   ASP A 375       4.550  10.210  -4.861  1.00 57.20           O  
ATOM   2862  CB  ASP A 375       4.148  10.750  -8.008  1.00 58.20           C  
ATOM   2863  CG  ASP A 375       3.737  11.874  -8.947  1.00 59.68           C  
ATOM   2864  OD1 ASP A 375       4.153  13.025  -8.708  1.00 61.19           O  
ATOM   2865  OD2 ASP A 375       2.999  11.608  -9.923  1.00 61.04           O  
ATOM   2866  N   GLU A 376       6.186   9.218  -6.042  1.00 56.18           N  
ATOM   2867  CA  GLU A 376       6.393   8.152  -5.074  1.00 58.28           C  
ATOM   2868  C   GLU A 376       7.169   8.653  -3.855  1.00 56.70           C  
ATOM   2869  O   GLU A 376       7.073   8.079  -2.768  1.00 55.02           O  
ATOM   2870  CB  GLU A 376       7.154   6.991  -5.727  1.00 63.07           C  
ATOM   2871  CG  GLU A 376       6.475   6.394  -6.954  1.00 70.68           C  
ATOM   2872  CD  GLU A 376       7.318   5.321  -7.632  1.00 77.17           C  
ATOM   2873  OE1 GLU A 376       8.448   5.057  -7.164  1.00 80.88           O  
ATOM   2874  OE2 GLU A 376       6.852   4.738  -8.637  1.00 80.26           O  
ATOM   2875  N   PHE A 377       7.940   9.721  -4.049  1.00 54.51           N  
ATOM   2876  CA  PHE A 377       8.735  10.304  -2.975  1.00 51.76           C  
ATOM   2877  C   PHE A 377       7.815  10.949  -1.938  1.00 53.31           C  
ATOM   2878  O   PHE A 377       8.049  10.837  -0.736  1.00 53.70           O  
ATOM   2879  CB  PHE A 377       9.685  11.388  -3.517  1.00 46.67           C  
ATOM   2880  CG  PHE A 377      10.819  10.867  -4.363  1.00 45.70           C  
ATOM   2881  CD1 PHE A 377      10.980   9.506  -4.609  1.00 44.64           C  
ATOM   2882  CD2 PHE A 377      11.728  11.757  -4.934  1.00 45.61           C  
ATOM   2883  CE1 PHE A 377      12.031   9.043  -5.412  1.00 43.72           C  
ATOM   2884  CE2 PHE A 377      12.779  11.301  -5.735  1.00 43.83           C  
ATOM   2885  CZ  PHE A 377      12.928   9.943  -5.973  1.00 42.28           C  
ATOM   2886  N   LYS A 378       6.768  11.617  -2.417  1.00 53.84           N  
ATOM   2887  CA  LYS A 378       5.813  12.327  -1.562  1.00 53.97           C  
ATOM   2888  C   LYS A 378       5.493  11.721  -0.180  1.00 49.91           C  
ATOM   2889  O   LYS A 378       5.787  12.332   0.845  1.00 48.27           O  
ATOM   2890  CB  LYS A 378       4.513  12.577  -2.340  1.00 59.37           C  
ATOM   2891  CG  LYS A 378       3.541  13.519  -1.641  1.00 66.56           C  
ATOM   2892  CD  LYS A 378       3.277  14.784  -2.456  1.00 72.26           C  
ATOM   2893  CE  LYS A 378       1.937  15.417  -2.070  1.00 73.39           C  
ATOM   2894  NZ  LYS A 378       1.864  16.852  -2.462  1.00 75.58           N  
ATOM   2895  N   PRO A 379       4.894  10.519  -0.135  1.00 45.82           N  
ATOM   2896  CA  PRO A 379       4.556   9.887   1.145  1.00 43.54           C  
ATOM   2897  C   PRO A 379       5.736   9.601   2.065  1.00 43.47           C  
ATOM   2898  O   PRO A 379       5.596   9.611   3.286  1.00 44.29           O  
ATOM   2899  CB  PRO A 379       3.843   8.602   0.736  1.00 45.27           C  
ATOM   2900  CG  PRO A 379       4.312   8.329  -0.644  1.00 46.41           C  
ATOM   2901  CD  PRO A 379       4.498   9.676  -1.275  1.00 46.66           C  
ATOM   2902  N   LEU A 380       6.894   9.331   1.474  1.00 42.50           N  
ATOM   2903  CA  LEU A 380       8.104   9.042   2.234  1.00 39.00           C  
ATOM   2904  C   LEU A 380       8.581  10.265   3.002  1.00 38.07           C  
ATOM   2905  O   LEU A 380       9.247  10.144   4.030  1.00 36.32           O  
ATOM   2906  CB  LEU A 380       9.217   8.600   1.286  1.00 41.83           C  
ATOM   2907  CG  LEU A 380       9.457   7.111   1.053  1.00 44.25           C  
ATOM   2908  CD1 LEU A 380       8.156   6.333   1.163  1.00 44.91           C  
ATOM   2909  CD2 LEU A 380      10.081   6.933  -0.320  1.00 43.28           C  
ATOM   2910  N   VAL A 381       8.250  11.444   2.487  1.00 37.11           N  
ATOM   2911  CA  VAL A 381       8.663  12.693   3.108  1.00 39.18           C  
ATOM   2912  C   VAL A 381       7.713  13.173   4.197  1.00 41.45           C  
ATOM   2913  O   VAL A 381       8.155  13.656   5.241  1.00 39.59           O  
ATOM   2914  CB  VAL A 381       8.799  13.815   2.065  1.00 37.84           C  
ATOM   2915  CG1 VAL A 381       9.375  15.061   2.722  1.00 37.76           C  
ATOM   2916  CG2 VAL A 381       9.693  13.363   0.929  1.00 37.02           C  
ATOM   2917  N   GLU A 382       6.413  13.046   3.954  1.00 43.60           N  
ATOM   2918  CA  GLU A 382       5.420  13.483   4.922  1.00 47.24           C  
ATOM   2919  C   GLU A 382       5.350  12.579   6.146  1.00 47.70           C  
ATOM   2920  O   GLU A 382       4.962  13.026   7.222  1.00 48.13           O  
ATOM   2921  CB  GLU A 382       4.046  13.559   4.271  1.00 50.50           C  
ATOM   2922  CG  GLU A 382       4.092  13.566   2.770  1.00 59.64           C  
ATOM   2923  CD  GLU A 382       3.216  14.637   2.171  1.00 63.73           C  
ATOM   2924  OE1 GLU A 382       2.008  14.374   1.984  1.00 65.56           O  
ATOM   2925  OE2 GLU A 382       3.738  15.740   1.888  1.00 68.71           O  
ATOM   2926  N   GLU A 383       5.724  11.312   5.992  1.00 46.85           N  
ATOM   2927  CA  GLU A 383       5.689  10.385   7.116  1.00 45.14           C  
ATOM   2928  C   GLU A 383       6.487  10.918   8.312  1.00 45.15           C  
ATOM   2929  O   GLU A 383       5.942  11.072   9.402  1.00 46.49           O  
ATOM   2930  CB  GLU A 383       6.202   9.001   6.688  1.00 45.67           C  
ATOM   2931  CG  GLU A 383       7.374   8.439   7.510  1.00 48.46           C  
ATOM   2932  CD  GLU A 383       6.921   7.699   8.748  1.00 49.02           C  
ATOM   2933  OE1 GLU A 383       5.703   7.484   8.895  1.00 51.49           O  
ATOM   2934  OE2 GLU A 383       7.777   7.329   9.578  1.00 48.72           O  
ATOM   2935  N   PRO A 384       7.782  11.227   8.127  1.00 44.10           N  
ATOM   2936  CA  PRO A 384       8.503  11.732   9.299  1.00 43.32           C  
ATOM   2937  C   PRO A 384       8.086  13.159   9.648  1.00 43.77           C  
ATOM   2938  O   PRO A 384       8.236  13.608  10.783  1.00 41.85           O  
ATOM   2939  CB  PRO A 384       9.967  11.638   8.888  1.00 42.67           C  
ATOM   2940  CG  PRO A 384       9.943  11.763   7.404  1.00 43.71           C  
ATOM   2941  CD  PRO A 384       8.640  11.176   6.928  1.00 43.62           C  
ATOM   2942  N   GLN A 385       7.550  13.866   8.663  1.00 44.67           N  
ATOM   2943  CA  GLN A 385       7.108  15.237   8.868  1.00 46.49           C  
ATOM   2944  C   GLN A 385       5.903  15.299   9.811  1.00 46.11           C  
ATOM   2945  O   GLN A 385       5.841  16.151  10.694  1.00 47.49           O  
ATOM   2946  CB  GLN A 385       6.739  15.872   7.525  1.00 48.57           C  
ATOM   2947  CG  GLN A 385       7.884  16.563   6.808  1.00 51.11           C  
ATOM   2948  CD  GLN A 385       7.507  16.997   5.401  1.00 53.96           C  
ATOM   2949  OE1 GLN A 385       6.334  16.957   5.014  1.00 55.90           O  
ATOM   2950  NE2 GLN A 385       8.501  17.415   4.627  1.00 56.76           N  
ATOM   2951  N   ASN A 386       4.944  14.398   9.614  1.00 45.15           N  
ATOM   2952  CA  ASN A 386       3.747  14.361  10.444  1.00 44.62           C  
ATOM   2953  C   ASN A 386       4.066  13.859  11.840  1.00 44.20           C  
ATOM   2954  O   ASN A 386       3.547  14.382  12.825  1.00 44.29           O  
ATOM   2955  CB  ASN A 386       2.687  13.466   9.807  1.00 45.12           C  
ATOM   2956  CG  ASN A 386       2.150  14.036   8.509  1.00 49.39           C  
ATOM   2957  OD1 ASN A 386       2.288  15.233   8.231  1.00 49.42           O  
ATOM   2958  ND2 ASN A 386       1.532  13.179   7.701  1.00 51.92           N  
ATOM   2959  N   LEU A 387       4.920  12.842  11.924  1.00 43.16           N  
ATOM   2960  CA  LEU A 387       5.307  12.290  13.215  1.00 42.07           C  
ATOM   2961  C   LEU A 387       5.909  13.400  14.058  1.00 41.36           C  
ATOM   2962  O   LEU A 387       5.631  13.496  15.248  1.00 43.75           O  
ATOM   2963  CB  LEU A 387       6.328  11.165  13.045  1.00 40.28           C  
ATOM   2964  CG  LEU A 387       5.770   9.764  12.781  1.00 40.10           C  
ATOM   2965  CD1 LEU A 387       6.761   8.721  13.278  1.00 38.03           C  
ATOM   2966  CD2 LEU A 387       4.423   9.605  13.466  1.00 38.83           C  
ATOM   2967  N   ILE A 388       6.726  14.247  13.443  1.00 37.86           N  
ATOM   2968  CA  ILE A 388       7.327  15.343  14.177  1.00 37.49           C  
ATOM   2969  C   ILE A 388       6.292  16.409  14.545  1.00 39.95           C  
ATOM   2970  O   ILE A 388       6.291  16.912  15.672  1.00 41.53           O  
ATOM   2971  CB  ILE A 388       8.459  15.984  13.380  1.00 35.69           C  
ATOM   2972  CG1 ILE A 388       9.547  14.936  13.131  1.00 35.43           C  
ATOM   2973  CG2 ILE A 388       8.990  17.214  14.119  1.00 35.13           C  
ATOM   2974  CD1 ILE A 388      10.926  15.292  13.656  1.00 36.41           C  
ATOM   2975  N   LYS A 389       5.410  16.753  13.610  1.00 40.10           N  
ATOM   2976  CA  LYS A 389       4.384  17.751  13.888  1.00 42.16           C  
ATOM   2977  C   LYS A 389       3.586  17.227  15.075  1.00 44.17           C  
ATOM   2978  O   LYS A 389       3.497  17.872  16.122  1.00 44.10           O  
ATOM   2979  CB  LYS A 389       3.461  17.940  12.676  1.00 38.34           C  
ATOM   2980  N   GLN A 390       3.031  16.035  14.897  1.00 46.16           N  
ATOM   2981  CA  GLN A 390       2.236  15.358  15.917  1.00 49.04           C  
ATOM   2982  C   GLN A 390       2.832  15.417  17.321  1.00 49.46           C  
ATOM   2983  O   GLN A 390       2.190  15.884  18.262  1.00 51.21           O  
ATOM   2984  CB  GLN A 390       2.073  13.891  15.537  1.00 51.82           C  
ATOM   2985  CG  GLN A 390       0.730  13.302  15.856  1.00 60.04           C  
ATOM   2986  CD  GLN A 390       0.114  12.641  14.643  1.00 65.37           C  
ATOM   2987  OE1 GLN A 390       0.783  12.448  13.626  1.00 67.91           O  
ATOM   2988  NE2 GLN A 390      -1.169  12.294  14.738  1.00 69.66           N  
ATOM   2989  N   ASN A 391       4.064  14.935  17.453  1.00 48.30           N  
ATOM   2990  CA  ASN A 391       4.731  14.884  18.745  1.00 47.81           C  
ATOM   2991  C   ASN A 391       5.177  16.204  19.351  1.00 48.40           C  
ATOM   2992  O   ASN A 391       5.363  16.288  20.562  1.00 46.65           O  
ATOM   2993  CB  ASN A 391       5.912  13.916  18.682  1.00 44.63           C  
ATOM   2994  CG  ASN A 391       5.486  12.479  18.899  1.00 43.71           C  
ATOM   2995  OD1 ASN A 391       5.970  11.807  19.802  1.00 45.47           O  
ATOM   2996  ND2 ASN A 391       4.564  12.005  18.073  1.00 42.85           N  
ATOM   2997  N   CYS A 392       5.365  17.234  18.535  1.00 49.63           N  
ATOM   2998  CA  CYS A 392       5.768  18.515  19.100  1.00 51.18           C  
ATOM   2999  C   CYS A 392       4.509  19.322  19.421  1.00 53.55           C  
ATOM   3000  O   CYS A 392       4.526  20.192  20.292  1.00 53.29           O  
ATOM   3001  CB  CYS A 392       6.676  19.291  18.139  1.00 48.78           C  
ATOM   3002  SG  CYS A 392       8.382  18.654  17.951  1.00 43.88           S  
ATOM   3003  N   GLU A 393       3.418  19.033  18.715  1.00 56.58           N  
ATOM   3004  CA  GLU A 393       2.158  19.721  18.972  1.00 59.88           C  
ATOM   3005  C   GLU A 393       1.718  19.265  20.365  1.00 59.79           C  
ATOM   3006  O   GLU A 393       1.107  20.020  21.124  1.00 62.38           O  
ATOM   3007  CB  GLU A 393       1.097  19.330  17.928  1.00 62.98           C  
ATOM   3008  CG  GLU A 393       0.365  20.519  17.290  1.00 70.13           C  
ATOM   3009  CD  GLU A 393      -1.023  20.162  16.760  1.00 74.87           C  
ATOM   3010  OE1 GLU A 393      -1.165  19.079  16.153  1.00 78.72           O  
ATOM   3011  OE2 GLU A 393      -1.972  20.963  16.946  1.00 76.74           O  
ATOM   3012  N   LEU A 394       2.065  18.023  20.694  1.00 56.92           N  
ATOM   3013  CA  LEU A 394       1.726  17.414  21.975  1.00 53.10           C  
ATOM   3014  C   LEU A 394       2.664  17.846  23.098  1.00 52.41           C  
ATOM   3015  O   LEU A 394       2.227  18.292  24.156  1.00 54.37           O  
ATOM   3016  CB  LEU A 394       1.771  15.895  21.837  1.00 51.87           C  
ATOM   3017  CG  LEU A 394       1.109  15.070  22.935  1.00 50.80           C  
ATOM   3018  CD1 LEU A 394      -0.393  15.057  22.728  1.00 51.12           C  
ATOM   3019  CD2 LEU A 394       1.661  13.658  22.900  1.00 50.06           C  
ATOM   3020  N   PHE A 395       3.960  17.700  22.870  1.00 49.67           N  
ATOM   3021  CA  PHE A 395       4.941  18.079  23.867  1.00 47.80           C  
ATOM   3022  C   PHE A 395       4.703  19.512  24.328  1.00 50.42           C  
ATOM   3023  O   PHE A 395       5.082  19.887  25.433  1.00 53.33           O  
ATOM   3024  CB  PHE A 395       6.347  17.943  23.284  1.00 44.18           C  
ATOM   3025  CG  PHE A 395       7.400  18.676  24.059  1.00 39.34           C  
ATOM   3026  CD1 PHE A 395       7.633  20.031  23.832  1.00 39.97           C  
ATOM   3027  CD2 PHE A 395       8.160  18.018  25.012  1.00 37.24           C  
ATOM   3028  CE1 PHE A 395       8.610  20.722  24.542  1.00 37.13           C  
ATOM   3029  CE2 PHE A 395       9.139  18.696  25.728  1.00 39.26           C  
ATOM   3030  CZ  PHE A 395       9.365  20.055  25.492  1.00 39.24           C  
ATOM   3031  N   GLU A 396       4.079  20.316  23.478  1.00 53.04           N  
ATOM   3032  CA  GLU A 396       3.813  21.706  23.816  1.00 55.12           C  
ATOM   3033  C   GLU A 396       2.743  21.813  24.901  1.00 56.57           C  
ATOM   3034  O   GLU A 396       2.968  22.431  25.947  1.00 56.73           O  
ATOM   3035  CB  GLU A 396       3.381  22.480  22.564  1.00 54.53           C  
ATOM   3036  N   GLN A 397       1.583  21.209  24.655  1.00 57.10           N  
ATOM   3037  CA  GLN A 397       0.494  21.246  25.625  1.00 57.92           C  
ATOM   3038  C   GLN A 397       0.957  20.732  26.989  1.00 56.77           C  
ATOM   3039  O   GLN A 397       1.004  21.487  27.962  1.00 59.01           O  
ATOM   3040  CB  GLN A 397      -0.694  20.409  25.142  1.00 59.63           C  
ATOM   3041  CG  GLN A 397      -0.961  20.468  23.651  1.00 63.85           C  
ATOM   3042  CD  GLN A 397      -1.695  19.233  23.162  1.00 68.24           C  
ATOM   3043  OE1 GLN A 397      -1.814  18.242  23.889  1.00 69.79           O  
ATOM   3044  NE2 GLN A 397      -2.192  19.283  21.927  1.00 70.11           N  
ATOM   3045  N   LEU A 398       1.301  19.450  27.057  1.00 53.42           N  
ATOM   3046  CA  LEU A 398       1.750  18.844  28.303  1.00 51.94           C  
ATOM   3047  C   LEU A 398       3.268  18.792  28.346  1.00 51.28           C  
ATOM   3048  O   LEU A 398       3.863  17.946  27.699  1.00 56.20           O  
ATOM   3049  CB  LEU A 398       1.185  17.426  28.424  1.00 51.93           C  
ATOM   3050  CG  LEU A 398       0.984  16.659  27.114  1.00 51.49           C  
ATOM   3051  CD1 LEU A 398       1.404  15.205  27.294  1.00 50.15           C  
ATOM   3052  CD2 LEU A 398      -0.475  16.757  26.680  1.00 51.68           C  
ATOM   3053  N   GLY A 399       3.879  19.688  29.115  1.00 49.88           N  
ATOM   3054  CA  GLY A 399       5.332  19.766  29.235  1.00 45.86           C  
ATOM   3055  C   GLY A 399       6.181  18.511  29.092  1.00 45.45           C  
ATOM   3056  O   GLY A 399       5.688  17.437  28.773  1.00 45.10           O  
ATOM   3057  N   GLU A 400       7.480  18.640  29.350  1.00 45.77           N  
ATOM   3058  CA  GLU A 400       8.392  17.505  29.219  1.00 46.32           C  
ATOM   3059  C   GLU A 400       8.004  16.280  30.041  1.00 47.27           C  
ATOM   3060  O   GLU A 400       7.992  15.158  29.527  1.00 49.03           O  
ATOM   3061  CB  GLU A 400       9.822  17.913  29.583  1.00 45.08           C  
ATOM   3062  CG  GLU A 400      10.794  16.731  29.613  1.00 50.90           C  
ATOM   3063  CD  GLU A 400      12.222  17.139  29.945  1.00 55.95           C  
ATOM   3064  OE1 GLU A 400      12.500  18.360  29.986  1.00 60.46           O  
ATOM   3065  OE2 GLU A 400      13.070  16.242  30.165  1.00 54.57           O  
ATOM   3066  N   TYR A 401       7.692  16.491  31.317  1.00 46.83           N  
ATOM   3067  CA  TYR A 401       7.328  15.389  32.201  1.00 43.50           C  
ATOM   3068  C   TYR A 401       6.032  14.701  31.775  1.00 41.26           C  
ATOM   3069  O   TYR A 401       5.998  13.488  31.585  1.00 41.91           O  
ATOM   3070  CB  TYR A 401       7.211  15.890  33.646  1.00 42.97           C  
ATOM   3071  CG  TYR A 401       6.655  14.859  34.597  1.00 42.12           C  
ATOM   3072  CD1 TYR A 401       7.432  13.781  35.022  1.00 41.22           C  
ATOM   3073  CD2 TYR A 401       5.337  14.940  35.045  1.00 41.51           C  
ATOM   3074  CE1 TYR A 401       6.909  12.810  35.863  1.00 39.97           C  
ATOM   3075  CE2 TYR A 401       4.805  13.977  35.885  1.00 41.11           C  
ATOM   3076  CZ  TYR A 401       5.594  12.916  36.289  1.00 42.86           C  
ATOM   3077  OH  TYR A 401       5.060  11.960  37.119  1.00 45.75           O  
ATOM   3078  N   LYS A 402       4.967  15.473  31.618  1.00 40.08           N  
ATOM   3079  CA  LYS A 402       3.694  14.896  31.221  1.00 40.64           C  
ATOM   3080  C   LYS A 402       3.845  14.202  29.879  1.00 41.35           C  
ATOM   3081  O   LYS A 402       3.248  13.151  29.638  1.00 41.30           O  
ATOM   3082  CB  LYS A 402       2.626  15.986  31.128  1.00 42.72           C  
ATOM   3083  CG  LYS A 402       1.953  16.309  32.458  1.00 43.78           C  
ATOM   3084  N   PHE A 403       4.648  14.803  29.007  1.00 40.96           N  
ATOM   3085  CA  PHE A 403       4.897  14.253  27.685  1.00 38.23           C  
ATOM   3086  C   PHE A 403       5.627  12.929  27.865  1.00 36.40           C  
ATOM   3087  O   PHE A 403       5.304  11.936  27.206  1.00 35.62           O  
ATOM   3088  CB  PHE A 403       5.751  15.227  26.850  1.00 40.59           C  
ATOM   3089  CG  PHE A 403       6.099  14.709  25.477  1.00 40.44           C  
ATOM   3090  CD1 PHE A 403       5.100  14.469  24.529  1.00 38.61           C  
ATOM   3091  CD2 PHE A 403       7.423  14.421  25.146  1.00 40.46           C  
ATOM   3092  CE1 PHE A 403       5.414  13.946  23.279  1.00 38.07           C  
ATOM   3093  CE2 PHE A 403       7.748  13.896  23.896  1.00 40.79           C  
ATOM   3094  CZ  PHE A 403       6.743  13.657  22.961  1.00 39.33           C  
ATOM   3095  N   GLN A 404       6.608  12.917  28.763  1.00 33.24           N  
ATOM   3096  CA  GLN A 404       7.366  11.701  29.029  1.00 34.60           C  
ATOM   3097  C   GLN A 404       6.399  10.599  29.439  1.00 35.39           C  
ATOM   3098  O   GLN A 404       6.645   9.421  29.191  1.00 36.97           O  
ATOM   3099  CB  GLN A 404       8.376  11.935  30.150  1.00 34.21           C  
ATOM   3100  CG  GLN A 404       9.706  12.494  29.689  1.00 35.92           C  
ATOM   3101  CD  GLN A 404      10.672  12.724  30.838  1.00 38.56           C  
ATOM   3102  OE1 GLN A 404      10.320  12.556  32.005  1.00 41.74           O  
ATOM   3103  NE2 GLN A 404      11.897  13.117  30.511  1.00 42.88           N  
ATOM   3104  N   ASN A 405       5.289  10.998  30.052  1.00 35.22           N  
ATOM   3105  CA  ASN A 405       4.272  10.063  30.516  1.00 35.42           C  
ATOM   3106  C   ASN A 405       3.344   9.550  29.412  1.00 35.85           C  
ATOM   3107  O   ASN A 405       2.884   8.407  29.459  1.00 33.72           O  
ATOM   3108  CB  ASN A 405       3.444  10.720  31.616  1.00 37.82           C  
ATOM   3109  CG  ASN A 405       4.240  10.943  32.894  1.00 41.23           C  
ATOM   3110  OD1 ASN A 405       5.413  10.563  32.993  1.00 42.99           O  
ATOM   3111  ND2 ASN A 405       3.602  11.561  33.883  1.00 39.08           N  
ATOM   3112  N   ALA A 406       3.051  10.401  28.433  1.00 36.18           N  
ATOM   3113  CA  ALA A 406       2.188  10.013  27.322  1.00 35.41           C  
ATOM   3114  C   ALA A 406       2.908   8.932  26.527  1.00 36.12           C  
ATOM   3115  O   ALA A 406       2.295   7.980  26.050  1.00 37.23           O  
ATOM   3116  CB  ALA A 406       1.907  11.211  26.439  1.00 35.42           C  
ATOM   3117  N   LEU A 407       4.220   9.091  26.394  1.00 36.08           N  
ATOM   3118  CA  LEU A 407       5.040   8.126  25.676  1.00 37.69           C  
ATOM   3119  C   LEU A 407       5.078   6.824  26.470  1.00 39.03           C  
ATOM   3120  O   LEU A 407       4.873   5.744  25.917  1.00 42.11           O  
ATOM   3121  CB  LEU A 407       6.464   8.668  25.497  1.00 36.45           C  
ATOM   3122  CG  LEU A 407       6.639   9.920  24.626  1.00 36.31           C  
ATOM   3123  CD1 LEU A 407       8.117  10.187  24.399  1.00 36.04           C  
ATOM   3124  CD2 LEU A 407       5.923   9.736  23.299  1.00 35.64           C  
ATOM   3125  N   LEU A 408       5.343   6.940  27.769  1.00 38.90           N  
ATOM   3126  CA  LEU A 408       5.399   5.790  28.668  1.00 35.91           C  
ATOM   3127  C   LEU A 408       4.202   4.891  28.423  1.00 35.74           C  
ATOM   3128  O   LEU A 408       4.339   3.685  28.227  1.00 36.02           O  
ATOM   3129  CB  LEU A 408       5.373   6.264  30.122  1.00 36.40           C  
ATOM   3130  CG  LEU A 408       6.267   5.604  31.176  1.00 38.10           C  
ATOM   3131  CD1 LEU A 408       7.570   5.084  30.583  1.00 38.95           C  
ATOM   3132  CD2 LEU A 408       6.567   6.637  32.234  1.00 37.87           C  
ATOM   3133  N   VAL A 409       3.020   5.491  28.437  1.00 34.81           N  
ATOM   3134  CA  VAL A 409       1.788   4.747  28.225  1.00 37.24           C  
ATOM   3135  C   VAL A 409       1.754   4.127  26.833  1.00 38.90           C  
ATOM   3136  O   VAL A 409       1.359   2.968  26.660  1.00 40.89           O  
ATOM   3137  CB  VAL A 409       0.562   5.675  28.399  1.00 35.83           C  
ATOM   3138  CG1 VAL A 409      -0.722   4.913  28.132  1.00 36.00           C  
ATOM   3139  CG2 VAL A 409       0.547   6.243  29.802  1.00 37.15           C  
ATOM   3140  N   ARG A 410       2.178   4.919  25.850  1.00 39.75           N  
ATOM   3141  CA  ARG A 410       2.202   4.524  24.445  1.00 38.64           C  
ATOM   3142  C   ARG A 410       3.082   3.324  24.151  1.00 37.69           C  
ATOM   3143  O   ARG A 410       2.634   2.358  23.548  1.00 38.57           O  
ATOM   3144  CB  ARG A 410       2.670   5.702  23.592  1.00 40.99           C  
ATOM   3145  CG  ARG A 410       2.755   5.405  22.109  1.00 41.03           C  
ATOM   3146  CD  ARG A 410       2.558   6.667  21.297  1.00 39.41           C  
ATOM   3147  NE  ARG A 410       3.836   7.200  20.852  1.00 42.48           N  
ATOM   3148  CZ  ARG A 410       4.097   8.496  20.714  1.00 44.89           C  
ATOM   3149  NH1 ARG A 410       3.163   9.398  20.991  1.00 41.47           N  
ATOM   3150  NH2 ARG A 410       5.296   8.888  20.297  1.00 45.52           N  
ATOM   3151  N   TYR A 411       4.333   3.389  24.578  1.00 37.06           N  
ATOM   3152  CA  TYR A 411       5.276   2.309  24.334  1.00 39.86           C  
ATOM   3153  C   TYR A 411       5.080   1.077  25.219  1.00 40.02           C  
ATOM   3154  O   TYR A 411       5.292  -0.047  24.771  1.00 40.20           O  
ATOM   3155  CB  TYR A 411       6.708   2.856  24.451  1.00 41.29           C  
ATOM   3156  CG  TYR A 411       6.994   3.909  23.399  1.00 44.53           C  
ATOM   3157  CD1 TYR A 411       6.750   3.650  22.042  1.00 46.78           C  
ATOM   3158  CD2 TYR A 411       7.421   5.191  23.755  1.00 44.48           C  
ATOM   3159  CE1 TYR A 411       6.902   4.637  21.073  1.00 47.63           C  
ATOM   3160  CE2 TYR A 411       7.584   6.190  22.787  1.00 48.13           C  
ATOM   3161  CZ  TYR A 411       7.316   5.909  21.450  1.00 49.60           C  
ATOM   3162  OH  TYR A 411       7.438   6.889  20.491  1.00 48.75           O  
ATOM   3163  N   THR A 412       4.677   1.283  26.470  1.00 40.88           N  
ATOM   3164  CA  THR A 412       4.445   0.167  27.383  1.00 39.77           C  
ATOM   3165  C   THR A 412       3.377  -0.725  26.760  1.00 38.42           C  
ATOM   3166  O   THR A 412       3.443  -1.952  26.832  1.00 37.23           O  
ATOM   3167  CB  THR A 412       3.948   0.661  28.761  1.00 41.42           C  
ATOM   3168  OG1 THR A 412       5.001   1.374  29.424  1.00 41.69           O  
ATOM   3169  CG2 THR A 412       3.520  -0.516  29.634  1.00 42.04           C  
ATOM   3170  N   LYS A 413       2.396  -0.091  26.131  1.00 38.62           N  
ATOM   3171  CA  LYS A 413       1.312  -0.814  25.480  1.00 41.27           C  
ATOM   3172  C   LYS A 413       1.746  -1.532  24.198  1.00 42.58           C  
ATOM   3173  O   LYS A 413       1.119  -2.507  23.789  1.00 45.31           O  
ATOM   3174  CB  LYS A 413       0.176   0.148  25.143  1.00 39.99           C  
ATOM   3175  CG  LYS A 413      -0.772   0.406  26.277  1.00 41.48           C  
ATOM   3176  CD  LYS A 413      -1.768   1.475  25.896  1.00 42.15           C  
ATOM   3177  CE  LYS A 413      -3.188   1.003  26.114  1.00 43.86           C  
ATOM   3178  NZ  LYS A 413      -3.997   2.079  26.741  1.00 46.62           N  
ATOM   3179  N   LYS A 414       2.807  -1.050  23.560  1.00 41.99           N  
ATOM   3180  CA  LYS A 414       3.283  -1.656  22.323  1.00 41.02           C  
ATOM   3181  C   LYS A 414       4.174  -2.844  22.596  1.00 40.47           C  
ATOM   3182  O   LYS A 414       4.082  -3.861  21.917  1.00 41.37           O  
ATOM   3183  CB  LYS A 414       4.060  -0.634  21.493  1.00 41.16           C  
ATOM   3184  CG  LYS A 414       3.278   0.619  21.208  1.00 41.62           C  
ATOM   3185  CD  LYS A 414       3.109   0.835  19.733  1.00 42.33           C  
ATOM   3186  CE  LYS A 414       3.546   2.232  19.348  1.00 44.10           C  
ATOM   3187  NZ  LYS A 414       2.858   2.692  18.112  1.00 43.14           N  
ATOM   3188  N   VAL A 415       5.041  -2.702  23.590  1.00 39.64           N  
ATOM   3189  CA  VAL A 415       5.973  -3.757  23.963  1.00 41.39           C  
ATOM   3190  C   VAL A 415       5.989  -3.923  25.488  1.00 43.45           C  
ATOM   3191  O   VAL A 415       6.970  -3.580  26.159  1.00 42.99           O  
ATOM   3192  CB  VAL A 415       7.406  -3.427  23.465  1.00 40.14           C  
ATOM   3193  CG1 VAL A 415       8.294  -4.643  23.613  1.00 41.01           C  
ATOM   3194  CG2 VAL A 415       7.370  -2.984  22.011  1.00 38.66           C  
ATOM   3195  N   PRO A 416       4.902  -4.480  26.048  1.00 45.92           N  
ATOM   3196  CA  PRO A 416       4.723  -4.717  27.488  1.00 46.14           C  
ATOM   3197  C   PRO A 416       5.760  -5.629  28.141  1.00 47.39           C  
ATOM   3198  O   PRO A 416       6.048  -5.496  29.330  1.00 49.69           O  
ATOM   3199  CB  PRO A 416       3.313  -5.308  27.587  1.00 46.64           C  
ATOM   3200  CG  PRO A 416       2.652  -4.999  26.285  1.00 45.44           C  
ATOM   3201  CD  PRO A 416       3.745  -4.956  25.270  1.00 46.11           C  
ATOM   3202  N   GLN A 417       6.313  -6.554  27.362  1.00 48.10           N  
ATOM   3203  CA  GLN A 417       7.307  -7.508  27.853  1.00 47.84           C  
ATOM   3204  C   GLN A 417       8.624  -6.862  28.280  1.00 47.56           C  
ATOM   3205  O   GLN A 417       9.471  -7.504  28.903  1.00 47.83           O  
ATOM   3206  CB  GLN A 417       7.584  -8.566  26.778  1.00 48.01           C  
ATOM   3207  CG  GLN A 417       6.341  -9.289  26.273  1.00 49.53           C  
ATOM   3208  CD  GLN A 417       5.633  -8.535  25.159  1.00 51.54           C  
ATOM   3209  OE1 GLN A 417       6.198  -7.629  24.549  1.00 54.04           O  
ATOM   3210  NE2 GLN A 417       4.388  -8.909  24.889  1.00 52.27           N  
ATOM   3211  N   VAL A 418       8.801  -5.591  27.948  1.00 48.33           N  
ATOM   3212  CA  VAL A 418      10.028  -4.892  28.302  1.00 48.81           C  
ATOM   3213  C   VAL A 418      10.094  -4.553  29.788  1.00 49.18           C  
ATOM   3214  O   VAL A 418       9.075  -4.289  30.423  1.00 49.27           O  
ATOM   3215  CB  VAL A 418      10.176  -3.589  27.490  1.00 47.96           C  
ATOM   3216  CG1 VAL A 418      11.432  -2.834  27.924  1.00 45.74           C  
ATOM   3217  CG2 VAL A 418      10.233  -3.916  26.019  1.00 47.41           C  
ATOM   3218  N   SER A 419      11.309  -4.560  30.326  1.00 50.22           N  
ATOM   3219  CA  SER A 419      11.563  -4.251  31.729  1.00 49.78           C  
ATOM   3220  C   SER A 419      11.023  -2.864  32.063  1.00 48.82           C  
ATOM   3221  O   SER A 419      11.222  -1.921  31.294  1.00 50.65           O  
ATOM   3222  CB  SER A 419      13.070  -4.301  31.987  1.00 51.89           C  
ATOM   3223  OG  SER A 419      13.364  -4.203  33.366  1.00 59.11           O  
ATOM   3224  N   THR A 420      10.349  -2.734  33.205  1.00 47.10           N  
ATOM   3225  CA  THR A 420       9.777  -1.447  33.609  1.00 45.10           C  
ATOM   3226  C   THR A 420      10.817  -0.332  33.711  1.00 44.30           C  
ATOM   3227  O   THR A 420      10.587   0.788  33.249  1.00 44.38           O  
ATOM   3228  CB  THR A 420       9.024  -1.553  34.961  1.00 44.84           C  
ATOM   3229  OG1 THR A 420       7.889  -2.418  34.813  1.00 45.56           O  
ATOM   3230  CG2 THR A 420       8.538  -0.177  35.417  1.00 40.00           C  
ATOM   3231  N   PRO A 421      11.969  -0.614  34.333  1.00 43.77           N  
ATOM   3232  CA  PRO A 421      12.982   0.441  34.438  1.00 45.30           C  
ATOM   3233  C   PRO A 421      13.569   0.822  33.077  1.00 47.69           C  
ATOM   3234  O   PRO A 421      14.119   1.914  32.915  1.00 50.23           O  
ATOM   3235  CB  PRO A 421      14.033  -0.150  35.380  1.00 43.18           C  
ATOM   3236  CG  PRO A 421      13.847  -1.620  35.295  1.00 43.10           C  
ATOM   3237  CD  PRO A 421      12.395  -1.864  34.984  1.00 44.05           C  
ATOM   3238  N   THR A 422      13.451  -0.081  32.104  1.00 46.96           N  
ATOM   3239  CA  THR A 422      13.964   0.169  30.760  1.00 45.46           C  
ATOM   3240  C   THR A 422      12.975   1.076  30.047  1.00 44.31           C  
ATOM   3241  O   THR A 422      13.361   2.070  29.424  1.00 44.99           O  
ATOM   3242  CB  THR A 422      14.116  -1.147  29.964  1.00 47.09           C  
ATOM   3243  OG1 THR A 422      15.330  -1.799  30.352  1.00 47.73           O  
ATOM   3244  CG2 THR A 422      14.164  -0.873  28.471  1.00 46.14           C  
ATOM   3245  N   LEU A 423      11.698   0.722  30.153  1.00 39.62           N  
ATOM   3246  CA  LEU A 423      10.632   1.491  29.542  1.00 37.68           C  
ATOM   3247  C   LEU A 423      10.626   2.910  30.094  1.00 39.60           C  
ATOM   3248  O   LEU A 423      10.210   3.853  29.421  1.00 40.20           O  
ATOM   3249  CB  LEU A 423       9.288   0.834  29.825  1.00 35.93           C  
ATOM   3250  CG  LEU A 423       8.904  -0.299  28.882  1.00 37.29           C  
ATOM   3251  CD1 LEU A 423       7.833  -1.150  29.515  1.00 35.86           C  
ATOM   3252  CD2 LEU A 423       8.419   0.276  27.570  1.00 40.67           C  
ATOM   3253  N   VAL A 424      11.078   3.064  31.331  1.00 40.27           N  
ATOM   3254  CA  VAL A 424      11.110   4.384  31.931  1.00 40.06           C  
ATOM   3255  C   VAL A 424      12.292   5.151  31.350  1.00 41.18           C  
ATOM   3256  O   VAL A 424      12.155   6.306  30.952  1.00 41.01           O  
ATOM   3257  CB  VAL A 424      11.230   4.302  33.472  1.00 38.50           C  
ATOM   3258  CG1 VAL A 424      11.384   5.699  34.057  1.00 34.49           C  
ATOM   3259  CG2 VAL A 424       9.994   3.624  34.049  1.00 37.22           C  
ATOM   3260  N   GLU A 425      13.448   4.499  31.286  1.00 41.33           N  
ATOM   3261  CA  GLU A 425      14.641   5.132  30.744  1.00 43.18           C  
ATOM   3262  C   GLU A 425      14.423   5.611  29.304  1.00 45.45           C  
ATOM   3263  O   GLU A 425      14.758   6.749  28.966  1.00 44.98           O  
ATOM   3264  CB  GLU A 425      15.819   4.152  30.789  1.00 44.60           C  
ATOM   3265  CG  GLU A 425      17.202   4.808  30.798  1.00 44.09           C  
ATOM   3266  N   VAL A 426      13.858   4.752  28.456  1.00 45.61           N  
ATOM   3267  CA  VAL A 426      13.636   5.128  27.067  1.00 45.66           C  
ATOM   3268  C   VAL A 426      12.651   6.275  26.948  1.00 46.05           C  
ATOM   3269  O   VAL A 426      12.964   7.295  26.334  1.00 49.59           O  
ATOM   3270  CB  VAL A 426      13.147   3.929  26.209  1.00 45.70           C  
ATOM   3271  CG1 VAL A 426      14.036   2.735  26.465  1.00 45.60           C  
ATOM   3272  CG2 VAL A 426      11.701   3.587  26.523  1.00 48.31           C  
ATOM   3273  N   SER A 427      11.473   6.125  27.543  1.00 44.22           N  
ATOM   3274  CA  SER A 427      10.464   7.172  27.479  1.00 42.87           C  
ATOM   3275  C   SER A 427      11.005   8.469  28.039  1.00 41.76           C  
ATOM   3276  O   SER A 427      10.607   9.549  27.614  1.00 42.07           O  
ATOM   3277  CB  SER A 427       9.224   6.754  28.252  1.00 43.66           C  
ATOM   3278  OG  SER A 427       8.761   5.503  27.781  1.00 46.32           O  
ATOM   3279  N   ARG A 428      11.919   8.358  28.993  1.00 42.38           N  
ATOM   3280  CA  ARG A 428      12.520   9.533  29.598  1.00 44.86           C  
ATOM   3281  C   ARG A 428      13.435  10.214  28.592  1.00 45.33           C  
ATOM   3282  O   ARG A 428      13.377  11.432  28.430  1.00 46.10           O  
ATOM   3283  CB  ARG A 428      13.301   9.143  30.851  1.00 46.06           C  
ATOM   3284  CG  ARG A 428      12.401   8.896  32.050  1.00 51.05           C  
ATOM   3285  CD  ARG A 428      13.118   9.155  33.362  1.00 53.18           C  
ATOM   3286  NE  ARG A 428      12.673  10.402  33.971  1.00 55.81           N  
ATOM   3287  CZ  ARG A 428      13.493  11.362  34.384  1.00 57.83           C  
ATOM   3288  NH1 ARG A 428      14.808  11.220  34.258  1.00 58.06           N  
ATOM   3289  NH2 ARG A 428      12.995  12.470  34.916  1.00 59.64           N  
ATOM   3290  N   ASN A 429      14.272   9.428  27.915  1.00 46.49           N  
ATOM   3291  CA  ASN A 429      15.186   9.965  26.902  1.00 47.03           C  
ATOM   3292  C   ASN A 429      14.400  10.569  25.741  1.00 46.32           C  
ATOM   3293  O   ASN A 429      14.632  11.707  25.339  1.00 45.85           O  
ATOM   3294  CB  ASN A 429      16.093   8.864  26.353  1.00 50.12           C  
ATOM   3295  CG  ASN A 429      16.980   8.256  27.413  1.00 54.23           C  
ATOM   3296  OD1 ASN A 429      17.243   8.875  28.447  1.00 56.59           O  
ATOM   3297  ND2 ASN A 429      17.449   7.031  27.166  1.00 53.58           N  
ATOM   3298  N   LEU A 430      13.467   9.796  25.200  1.00 45.75           N  
ATOM   3299  CA  LEU A 430      12.654  10.263  24.090  1.00 46.59           C  
ATOM   3300  C   LEU A 430      12.009  11.609  24.406  1.00 48.15           C  
ATOM   3301  O   LEU A 430      11.864  12.457  23.524  1.00 50.18           O  
ATOM   3302  CB  LEU A 430      11.581   9.226  23.756  1.00 43.59           C  
ATOM   3303  CG  LEU A 430      11.794   8.414  22.473  1.00 43.80           C  
ATOM   3304  CD1 LEU A 430      13.274   8.148  22.239  1.00 41.83           C  
ATOM   3305  CD2 LEU A 430      11.035   7.108  22.585  1.00 44.52           C  
ATOM   3306  N   GLY A 431      11.626  11.804  25.665  1.00 50.21           N  
ATOM   3307  CA  GLY A 431      11.012  13.058  26.065  1.00 49.79           C  
ATOM   3308  C   GLY A 431      11.985  14.212  25.925  1.00 50.62           C  
ATOM   3309  O   GLY A 431      11.619  15.295  25.463  1.00 50.24           O  
ATOM   3310  N   LYS A 432      13.233  13.980  26.321  1.00 50.74           N  
ATOM   3311  CA  LYS A 432      14.267  15.006  26.232  1.00 52.15           C  
ATOM   3312  C   LYS A 432      14.547  15.368  24.775  1.00 52.84           C  
ATOM   3313  O   LYS A 432      14.921  16.502  24.470  1.00 54.29           O  
ATOM   3314  CB  LYS A 432      15.556  14.520  26.899  1.00 52.54           C  
ATOM   3315  CG  LYS A 432      15.333  13.684  28.145  1.00 56.60           C  
ATOM   3316  CD  LYS A 432      16.277  14.097  29.264  1.00 60.35           C  
ATOM   3317  CE  LYS A 432      16.903  12.886  29.950  1.00 61.37           C  
ATOM   3318  NZ  LYS A 432      18.369  13.078  30.187  1.00 62.75           N  
ATOM   3319  N   VAL A 433      14.378  14.398  23.879  1.00 51.90           N  
ATOM   3320  CA  VAL A 433      14.603  14.636  22.458  1.00 48.30           C  
ATOM   3321  C   VAL A 433      13.553  15.640  22.012  1.00 49.68           C  
ATOM   3322  O   VAL A 433      13.842  16.536  21.224  1.00 50.66           O  
ATOM   3323  CB  VAL A 433      14.451  13.337  21.624  1.00 45.57           C  
ATOM   3324  CG1 VAL A 433      14.558  13.651  20.134  1.00 39.57           C  
ATOM   3325  CG2 VAL A 433      15.508  12.326  22.042  1.00 39.34           C  
ATOM   3326  N   GLY A 434      12.336  15.490  22.531  1.00 47.82           N  
ATOM   3327  CA  GLY A 434      11.268  16.405  22.175  1.00 48.27           C  
ATOM   3328  C   GLY A 434      11.576  17.823  22.623  1.00 49.02           C  
ATOM   3329  O   GLY A 434      11.317  18.790  21.903  1.00 49.28           O  
ATOM   3330  N   SER A 435      12.137  17.944  23.820  1.00 50.06           N  
ATOM   3331  CA  SER A 435      12.482  19.246  24.378  1.00 52.62           C  
ATOM   3332  C   SER A 435      13.592  19.903  23.579  1.00 52.84           C  
ATOM   3333  O   SER A 435      13.540  21.093  23.280  1.00 55.76           O  
ATOM   3334  CB  SER A 435      12.943  19.095  25.828  1.00 52.51           C  
ATOM   3335  OG  SER A 435      11.873  18.691  26.659  1.00 57.87           O  
ATOM   3336  N   LYS A 436      14.599  19.108  23.246  1.00 51.56           N  
ATOM   3337  CA  LYS A 436      15.747  19.576  22.498  1.00 49.57           C  
ATOM   3338  C   LYS A 436      15.397  19.996  21.073  1.00 48.43           C  
ATOM   3339  O   LYS A 436      15.779  21.076  20.619  1.00 49.72           O  
ATOM   3340  CB  LYS A 436      16.799  18.470  22.458  1.00 51.53           C  
ATOM   3341  CG  LYS A 436      18.186  18.952  22.140  1.00 56.74           C  
ATOM   3342  CD  LYS A 436      18.786  19.686  23.319  1.00 61.13           C  
ATOM   3343  CE  LYS A 436      20.156  20.240  22.979  1.00 64.04           C  
ATOM   3344  NZ  LYS A 436      20.713  21.014  24.121  1.00 66.47           N  
ATOM   3345  N   CYS A 437      14.645  19.152  20.380  1.00 44.76           N  
ATOM   3346  CA  CYS A 437      14.297  19.410  18.992  1.00 42.95           C  
ATOM   3347  C   CYS A 437      13.058  20.226  18.685  1.00 43.95           C  
ATOM   3348  O   CYS A 437      13.017  20.903  17.656  1.00 46.34           O  
ATOM   3349  CB  CYS A 437      14.211  18.083  18.225  1.00 39.91           C  
ATOM   3350  SG  CYS A 437      15.736  17.094  18.303  1.00 36.19           S  
ATOM   3351  N   CYS A 438      12.042  20.175  19.537  1.00 42.22           N  
ATOM   3352  CA  CYS A 438      10.836  20.933  19.229  1.00 41.23           C  
ATOM   3353  C   CYS A 438      11.023  22.440  19.368  1.00 39.55           C  
ATOM   3354  O   CYS A 438      10.179  23.223  18.934  1.00 36.78           O  
ATOM   3355  CB  CYS A 438       9.670  20.449  20.086  1.00 41.63           C  
ATOM   3356  SG  CYS A 438       9.231  18.706  19.797  1.00 44.29           S  
ATOM   3357  N   LYS A 439      12.142  22.844  19.954  1.00 41.38           N  
ATOM   3358  CA  LYS A 439      12.429  24.260  20.128  1.00 46.29           C  
ATOM   3359  C   LYS A 439      12.941  24.876  18.818  1.00 49.73           C  
ATOM   3360  O   LYS A 439      12.981  26.102  18.672  1.00 50.68           O  
ATOM   3361  CB  LYS A 439      13.466  24.448  21.240  1.00 46.70           C  
ATOM   3362  N   HIS A 440      13.324  24.014  17.872  1.00 51.09           N  
ATOM   3363  CA  HIS A 440      13.837  24.437  16.563  1.00 49.06           C  
ATOM   3364  C   HIS A 440      12.740  24.645  15.529  1.00 46.78           C  
ATOM   3365  O   HIS A 440      11.676  24.032  15.597  1.00 47.04           O  
ATOM   3366  CB  HIS A 440      14.784  23.393  15.967  1.00 50.62           C  
ATOM   3367  CG  HIS A 440      15.983  23.093  16.802  1.00 53.44           C  
ATOM   3368  ND1 HIS A 440      17.147  23.825  16.726  1.00 55.02           N  
ATOM   3369  CD2 HIS A 440      16.216  22.105  17.697  1.00 55.12           C  
ATOM   3370  CE1 HIS A 440      18.048  23.301  17.536  1.00 56.43           C  
ATOM   3371  NE2 HIS A 440      17.509  22.255  18.138  1.00 57.56           N  
ATOM   3372  N   PRO A 441      12.994  25.520  14.548  1.00 45.74           N  
ATOM   3373  CA  PRO A 441      12.005  25.772  13.497  1.00 46.00           C  
ATOM   3374  C   PRO A 441      11.765  24.449  12.768  1.00 47.48           C  
ATOM   3375  O   PRO A 441      12.522  23.503  12.938  1.00 46.91           O  
ATOM   3376  CB  PRO A 441      12.688  26.789  12.586  1.00 45.40           C  
ATOM   3377  CG  PRO A 441      13.774  27.399  13.415  1.00 44.95           C  
ATOM   3378  CD  PRO A 441      14.205  26.345  14.387  1.00 45.68           C  
ATOM   3379  N   GLU A 442      10.728  24.389  11.946  1.00 50.47           N  
ATOM   3380  CA  GLU A 442      10.410  23.177  11.197  1.00 54.04           C  
ATOM   3381  C   GLU A 442      11.608  22.642  10.394  1.00 54.57           C  
ATOM   3382  O   GLU A 442      11.905  21.448  10.419  1.00 55.53           O  
ATOM   3383  CB  GLU A 442       9.239  23.470  10.258  1.00 57.04           C  
ATOM   3384  CG  GLU A 442       8.665  22.274   9.537  1.00 64.58           C  
ATOM   3385  CD  GLU A 442       7.273  22.555   9.001  1.00 69.61           C  
ATOM   3386  OE1 GLU A 442       6.550  23.365   9.625  1.00 71.06           O  
ATOM   3387  OE2 GLU A 442       6.901  21.971   7.959  1.00 71.86           O  
ATOM   3388  N   ALA A 443      12.301  23.542   9.703  1.00 53.65           N  
ATOM   3389  CA  ALA A 443      13.442  23.196   8.862  1.00 52.50           C  
ATOM   3390  C   ALA A 443      14.626  22.511   9.541  1.00 51.86           C  
ATOM   3391  O   ALA A 443      15.425  21.863   8.869  1.00 53.83           O  
ATOM   3392  CB  ALA A 443      13.930  24.445   8.133  1.00 53.54           C  
ATOM   3393  N   LYS A 444      14.760  22.650  10.854  1.00 49.29           N  
ATOM   3394  CA  LYS A 444      15.884  22.023  11.544  1.00 47.26           C  
ATOM   3395  C   LYS A 444      15.459  20.856  12.427  1.00 44.53           C  
ATOM   3396  O   LYS A 444      16.296  20.190  13.040  1.00 43.09           O  
ATOM   3397  CB  LYS A 444      16.619  23.052  12.404  1.00 51.25           C  
ATOM   3398  CG  LYS A 444      17.297  24.164  11.620  1.00 58.46           C  
ATOM   3399  CD  LYS A 444      18.202  25.003  12.526  1.00 64.50           C  
ATOM   3400  CE  LYS A 444      19.685  24.686  12.305  1.00 67.54           C  
ATOM   3401  NZ  LYS A 444      20.434  24.493  13.583  1.00 68.61           N  
ATOM   3402  N   ARG A 445      14.159  20.600  12.484  1.00 40.93           N  
ATOM   3403  CA  ARG A 445      13.645  19.532  13.326  1.00 39.92           C  
ATOM   3404  C   ARG A 445      14.042  18.118  12.923  1.00 39.98           C  
ATOM   3405  O   ARG A 445      14.690  17.419  13.704  1.00 40.40           O  
ATOM   3406  CB  ARG A 445      12.129  19.637  13.420  1.00 38.21           C  
ATOM   3407  CG  ARG A 445      11.698  20.773  14.314  1.00 38.03           C  
ATOM   3408  CD  ARG A 445      10.203  20.943  14.317  1.00 40.21           C  
ATOM   3409  NE  ARG A 445       9.791  21.855  15.378  1.00 43.28           N  
ATOM   3410  CZ  ARG A 445       8.529  22.083  15.721  1.00 43.24           C  
ATOM   3411  NH1 ARG A 445       7.544  21.454  15.086  1.00 39.32           N  
ATOM   3412  NH2 ARG A 445       8.257  22.929  16.709  1.00 43.67           N  
ATOM   3413  N   MET A 446      13.661  17.696  11.718  1.00 37.87           N  
ATOM   3414  CA  MET A 446      13.978  16.349  11.250  1.00 36.42           C  
ATOM   3415  C   MET A 446      15.442  15.980  11.443  1.00 34.83           C  
ATOM   3416  O   MET A 446      15.765  14.895  11.917  1.00 35.57           O  
ATOM   3417  CB  MET A 446      13.600  16.181   9.780  1.00 37.21           C  
ATOM   3418  CG  MET A 446      13.626  14.726   9.325  1.00 39.90           C  
ATOM   3419  SD  MET A 446      12.529  14.327   7.952  1.00 40.98           S  
ATOM   3420  CE  MET A 446      11.727  15.927   7.626  1.00 42.38           C  
ATOM   3421  N   PRO A 447      16.355  16.867  11.051  1.00 34.25           N  
ATOM   3422  CA  PRO A 447      17.763  16.513  11.248  1.00 32.33           C  
ATOM   3423  C   PRO A 447      18.092  16.323  12.730  1.00 31.56           C  
ATOM   3424  O   PRO A 447      18.904  15.465  13.087  1.00 32.34           O  
ATOM   3425  CB  PRO A 447      18.526  17.686  10.630  1.00 31.81           C  
ATOM   3426  CG  PRO A 447      17.518  18.385   9.739  1.00 34.37           C  
ATOM   3427  CD  PRO A 447      16.186  18.172  10.389  1.00 34.82           C  
ATOM   3428  N   CYS A 448      17.459  17.127  13.586  1.00 31.87           N  
ATOM   3429  CA  CYS A 448      17.672  17.058  15.038  1.00 29.91           C  
ATOM   3430  C   CYS A 448      17.184  15.730  15.627  1.00 27.55           C  
ATOM   3431  O   CYS A 448      17.924  15.044  16.335  1.00 25.38           O  
ATOM   3432  CB  CYS A 448      16.948  18.223  15.741  1.00 34.55           C  
ATOM   3433  SG  CYS A 448      17.179  18.321  17.560  1.00 38.00           S  
ATOM   3434  N   ALA A 449      15.935  15.380  15.332  1.00 26.11           N  
ATOM   3435  CA  ALA A 449      15.338  14.143  15.822  1.00 29.01           C  
ATOM   3436  C   ALA A 449      16.172  12.927  15.452  1.00 33.28           C  
ATOM   3437  O   ALA A 449      16.403  12.045  16.286  1.00 35.53           O  
ATOM   3438  CB  ALA A 449      13.937  13.989  15.264  1.00 27.42           C  
ATOM   3439  N   GLU A 450      16.615  12.884  14.194  1.00 35.54           N  
ATOM   3440  CA  GLU A 450      17.423  11.779  13.685  1.00 36.07           C  
ATOM   3441  C   GLU A 450      18.711  11.646  14.476  1.00 35.58           C  
ATOM   3442  O   GLU A 450      19.136  10.546  14.825  1.00 35.06           O  
ATOM   3443  CB  GLU A 450      17.755  11.999  12.206  1.00 37.60           C  
ATOM   3444  CG  GLU A 450      18.688  10.938  11.628  1.00 41.83           C  
ATOM   3445  CD  GLU A 450      19.285  11.315  10.279  1.00 41.21           C  
ATOM   3446  OE1 GLU A 450      19.810  12.444  10.139  1.00 40.15           O  
ATOM   3447  OE2 GLU A 450      19.230  10.467   9.363  1.00 41.74           O  
ATOM   3448  N   ASP A 451      19.333  12.780  14.746  1.00 37.53           N  
ATOM   3449  CA  ASP A 451      20.570  12.803  15.500  1.00 42.43           C  
ATOM   3450  C   ASP A 451      20.419  12.114  16.852  1.00 41.04           C  
ATOM   3451  O   ASP A 451      21.238  11.282  17.232  1.00 40.05           O  
ATOM   3452  CB  ASP A 451      21.009  14.248  15.723  1.00 49.77           C  
ATOM   3453  CG  ASP A 451      22.487  14.442  15.492  1.00 59.02           C  
ATOM   3454  OD1 ASP A 451      22.928  14.266  14.332  1.00 63.88           O  
ATOM   3455  OD2 ASP A 451      23.203  14.766  16.468  1.00 62.42           O  
ATOM   3456  N   TYR A 452      19.361  12.474  17.571  1.00 40.91           N  
ATOM   3457  CA  TYR A 452      19.093  11.933  18.898  1.00 38.78           C  
ATOM   3458  C   TYR A 452      18.504  10.530  18.904  1.00 36.46           C  
ATOM   3459  O   TYR A 452      18.982   9.651  19.619  1.00 35.69           O  
ATOM   3460  CB  TYR A 452      18.167  12.885  19.645  1.00 40.41           C  
ATOM   3461  CG  TYR A 452      18.855  14.157  20.078  1.00 43.57           C  
ATOM   3462  CD1 TYR A 452      19.918  14.121  20.979  1.00 44.99           C  
ATOM   3463  CD2 TYR A 452      18.445  15.398  19.593  1.00 45.51           C  
ATOM   3464  CE1 TYR A 452      20.554  15.288  21.388  1.00 46.62           C  
ATOM   3465  CE2 TYR A 452      19.075  16.572  19.996  1.00 46.56           C  
ATOM   3466  CZ  TYR A 452      20.129  16.509  20.895  1.00 46.98           C  
ATOM   3467  OH  TYR A 452      20.761  17.661  21.309  1.00 48.21           O  
ATOM   3468  N   LEU A 453      17.461  10.325  18.112  1.00 34.45           N  
ATOM   3469  CA  LEU A 453      16.819   9.022  18.036  1.00 35.84           C  
ATOM   3470  C   LEU A 453      17.810   7.920  17.675  1.00 36.11           C  
ATOM   3471  O   LEU A 453      17.850   6.879  18.324  1.00 38.36           O  
ATOM   3472  CB  LEU A 453      15.703   9.057  16.998  1.00 36.40           C  
ATOM   3473  CG  LEU A 453      14.261   8.893  17.476  1.00 38.46           C  
ATOM   3474  CD1 LEU A 453      14.125   9.299  18.940  1.00 39.95           C  
ATOM   3475  CD2 LEU A 453      13.365   9.745  16.593  1.00 41.21           C  
ATOM   3476  N   SER A 454      18.601   8.165  16.634  1.00 36.38           N  
ATOM   3477  CA  SER A 454      19.597   7.217  16.145  1.00 36.19           C  
ATOM   3478  C   SER A 454      20.405   6.556  17.260  1.00 36.17           C  
ATOM   3479  O   SER A 454      20.656   5.351  17.218  1.00 36.55           O  
ATOM   3480  CB  SER A 454      20.544   7.926  15.182  1.00 35.31           C  
ATOM   3481  OG  SER A 454      21.312   8.888  15.881  1.00 39.53           O  
ATOM   3482  N   VAL A 455      20.824   7.343  18.247  1.00 36.15           N  
ATOM   3483  CA  VAL A 455      21.591   6.801  19.364  1.00 36.88           C  
ATOM   3484  C   VAL A 455      20.659   6.058  20.303  1.00 38.26           C  
ATOM   3485  O   VAL A 455      20.935   4.927  20.706  1.00 40.42           O  
ATOM   3486  CB  VAL A 455      22.294   7.900  20.182  1.00 37.03           C  
ATOM   3487  CG1 VAL A 455      23.786   7.771  20.030  1.00 38.34           C  
ATOM   3488  CG2 VAL A 455      21.834   9.272  19.732  1.00 40.08           C  
ATOM   3489  N   VAL A 456      19.549   6.695  20.653  1.00 36.84           N  
ATOM   3490  CA  VAL A 456      18.601   6.063  21.554  1.00 37.35           C  
ATOM   3491  C   VAL A 456      18.202   4.706  21.000  1.00 36.90           C  
ATOM   3492  O   VAL A 456      18.200   3.711  21.721  1.00 36.85           O  
ATOM   3493  CB  VAL A 456      17.319   6.915  21.740  1.00 36.45           C  
ATOM   3494  CG1 VAL A 456      16.284   6.132  22.538  1.00 31.19           C  
ATOM   3495  CG2 VAL A 456      17.655   8.207  22.450  1.00 35.91           C  
ATOM   3496  N   LEU A 457      17.874   4.679  19.712  1.00 36.48           N  
ATOM   3497  CA  LEU A 457      17.446   3.456  19.055  1.00 36.69           C  
ATOM   3498  C   LEU A 457      18.545   2.418  19.004  1.00 39.14           C  
ATOM   3499  O   LEU A 457      18.279   1.221  19.048  1.00 40.64           O  
ATOM   3500  CB  LEU A 457      16.947   3.761  17.645  1.00 33.82           C  
ATOM   3501  CG  LEU A 457      15.428   3.683  17.469  1.00 34.11           C  
ATOM   3502  CD1 LEU A 457      14.746   4.407  18.615  1.00 33.20           C  
ATOM   3503  CD2 LEU A 457      15.022   4.305  16.142  1.00 34.29           C  
ATOM   3504  N   ASN A 458      19.784   2.868  18.914  1.00 42.01           N  
ATOM   3505  CA  ASN A 458      20.882   1.924  18.869  1.00 47.85           C  
ATOM   3506  C   ASN A 458      21.106   1.383  20.271  1.00 50.25           C  
ATOM   3507  O   ASN A 458      21.272   0.181  20.457  1.00 51.49           O  
ATOM   3508  CB  ASN A 458      22.155   2.591  18.344  1.00 50.68           C  
ATOM   3509  CG  ASN A 458      23.131   1.588  17.752  1.00 52.63           C  
ATOM   3510  OD1 ASN A 458      22.818   0.901  16.778  1.00 53.37           O  
ATOM   3511  ND2 ASN A 458      24.319   1.495  18.344  1.00 52.27           N  
ATOM   3512  N   GLN A 459      21.114   2.279  21.255  1.00 52.93           N  
ATOM   3513  CA  GLN A 459      21.294   1.887  22.649  1.00 55.07           C  
ATOM   3514  C   GLN A 459      20.222   0.838  22.945  1.00 54.34           C  
ATOM   3515  O   GLN A 459      20.494  -0.248  23.462  1.00 53.42           O  
ATOM   3516  CB  GLN A 459      21.087   3.097  23.566  1.00 58.70           C  
ATOM   3517  CG  GLN A 459      22.132   4.201  23.424  1.00 66.91           C  
ATOM   3518  CD  GLN A 459      21.996   5.279  24.499  1.00 72.60           C  
ATOM   3519  OE1 GLN A 459      22.387   5.075  25.650  1.00 76.40           O  
ATOM   3520  NE2 GLN A 459      21.437   6.430  24.126  1.00 74.76           N  
ATOM   3521  N   LEU A 460      18.995   1.198  22.603  1.00 52.83           N  
ATOM   3522  CA  LEU A 460      17.833   0.352  22.776  1.00 51.20           C  
ATOM   3523  C   LEU A 460      18.093  -1.052  22.238  1.00 52.07           C  
ATOM   3524  O   LEU A 460      17.857  -2.046  22.924  1.00 53.50           O  
ATOM   3525  CB  LEU A 460      16.675   0.975  22.016  1.00 52.33           C  
ATOM   3526  CG  LEU A 460      15.268   0.598  22.429  1.00 54.45           C  
ATOM   3527  CD1 LEU A 460      14.953   1.281  23.737  1.00 56.61           C  
ATOM   3528  CD2 LEU A 460      14.291   1.018  21.345  1.00 54.61           C  
ATOM   3529  N   CYS A 461      18.581  -1.122  21.002  1.00 50.82           N  
ATOM   3530  CA  CYS A 461      18.858  -2.393  20.339  1.00 48.94           C  
ATOM   3531  C   CYS A 461      20.007  -3.205  20.930  1.00 49.43           C  
ATOM   3532  O   CYS A 461      20.018  -4.432  20.826  1.00 50.87           O  
ATOM   3533  CB  CYS A 461      19.120  -2.155  18.853  1.00 46.46           C  
ATOM   3534  SG  CYS A 461      17.612  -1.832  17.895  1.00 43.65           S  
ATOM   3535  N   VAL A 462      20.981  -2.537  21.533  1.00 48.58           N  
ATOM   3536  CA  VAL A 462      22.095  -3.259  22.129  1.00 49.37           C  
ATOM   3537  C   VAL A 462      21.592  -4.062  23.329  1.00 50.81           C  
ATOM   3538  O   VAL A 462      22.003  -5.205  23.532  1.00 51.50           O  
ATOM   3539  CB  VAL A 462      23.204  -2.303  22.598  1.00 49.39           C  
ATOM   3540  CG1 VAL A 462      24.392  -3.099  23.120  1.00 49.07           C  
ATOM   3541  CG2 VAL A 462      23.627  -1.411  21.454  1.00 48.61           C  
ATOM   3542  N   LEU A 463      20.701  -3.459  24.116  1.00 50.07           N  
ATOM   3543  CA  LEU A 463      20.136  -4.124  25.286  1.00 48.48           C  
ATOM   3544  C   LEU A 463      19.372  -5.347  24.833  1.00 49.45           C  
ATOM   3545  O   LEU A 463      19.651  -6.466  25.256  1.00 52.24           O  
ATOM   3546  CB  LEU A 463      19.169  -3.208  26.026  1.00 45.04           C  
ATOM   3547  CG  LEU A 463      19.731  -1.934  26.639  1.00 45.34           C  
ATOM   3548  CD1 LEU A 463      18.584  -1.114  27.202  1.00 44.02           C  
ATOM   3549  CD2 LEU A 463      20.742  -2.280  27.720  1.00 45.48           C  
ATOM   3550  N   HIS A 464      18.395  -5.126  23.969  1.00 49.62           N  
ATOM   3551  CA  HIS A 464      17.597  -6.226  23.478  1.00 51.36           C  
ATOM   3552  C   HIS A 464      18.487  -7.371  23.022  1.00 53.97           C  
ATOM   3553  O   HIS A 464      18.130  -8.541  23.154  1.00 53.99           O  
ATOM   3554  CB  HIS A 464      16.712  -5.762  22.330  1.00 48.70           C  
ATOM   3555  CG  HIS A 464      15.470  -6.575  22.180  1.00 46.94           C  
ATOM   3556  ND1 HIS A 464      15.259  -7.416  21.112  1.00 48.33           N  
ATOM   3557  CD2 HIS A 464      14.385  -6.698  22.979  1.00 47.68           C  
ATOM   3558  CE1 HIS A 464      14.095  -8.025  21.258  1.00 48.13           C  
ATOM   3559  NE2 HIS A 464      13.545  -7.605  22.385  1.00 50.51           N  
ATOM   3560  N   GLU A 465      19.652  -7.029  22.488  1.00 58.36           N  
ATOM   3561  CA  GLU A 465      20.593  -8.035  22.019  1.00 63.40           C  
ATOM   3562  C   GLU A 465      20.899  -9.015  23.151  1.00 64.39           C  
ATOM   3563  O   GLU A 465      20.613 -10.211  23.051  1.00 64.28           O  
ATOM   3564  CB  GLU A 465      21.887  -7.358  21.550  1.00 67.26           C  
ATOM   3565  CG  GLU A 465      22.937  -8.312  21.007  1.00 72.99           C  
ATOM   3566  CD  GLU A 465      22.607  -8.799  19.608  1.00 77.38           C  
ATOM   3567  OE1 GLU A 465      22.675  -7.983  18.660  1.00 79.83           O  
ATOM   3568  OE2 GLU A 465      22.278  -9.999  19.459  1.00 79.33           O  
ATOM   3569  N   LYS A 466      21.467  -8.483  24.230  1.00 64.59           N  
ATOM   3570  CA  LYS A 466      21.845  -9.268  25.399  1.00 63.96           C  
ATOM   3571  C   LYS A 466      20.678  -9.960  26.091  1.00 64.01           C  
ATOM   3572  O   LYS A 466      20.811 -11.091  26.563  1.00 66.59           O  
ATOM   3573  CB  LYS A 466      22.566  -8.377  26.413  1.00 62.88           C  
ATOM   3574  CG  LYS A 466      23.392  -7.271  25.788  1.00 63.19           C  
ATOM   3575  CD  LYS A 466      22.965  -5.913  26.311  1.00 63.32           C  
ATOM   3576  N   THR A 467      19.538  -9.285  26.160  1.00 61.88           N  
ATOM   3577  CA  THR A 467      18.380  -9.858  26.827  1.00 59.77           C  
ATOM   3578  C   THR A 467      17.128  -9.765  25.978  1.00 56.92           C  
ATOM   3579  O   THR A 467      16.211  -9.009  26.291  1.00 57.00           O  
ATOM   3580  CB  THR A 467      18.117  -9.156  28.177  1.00 61.82           C  
ATOM   3581  OG1 THR A 467      18.029  -7.742  27.969  1.00 66.02           O  
ATOM   3582  CG2 THR A 467      19.245  -9.439  29.158  1.00 62.14           C  
ATOM   3583  N   PRO A 468      17.070 -10.542  24.888  1.00 55.12           N  
ATOM   3584  CA  PRO A 468      15.904 -10.532  23.997  1.00 52.32           C  
ATOM   3585  C   PRO A 468      14.606 -10.586  24.787  1.00 49.56           C  
ATOM   3586  O   PRO A 468      14.558 -11.153  25.876  1.00 50.10           O  
ATOM   3587  CB  PRO A 468      16.094 -11.771  23.118  1.00 52.39           C  
ATOM   3588  CG  PRO A 468      17.301 -12.494  23.678  1.00 56.55           C  
ATOM   3589  CD  PRO A 468      18.102 -11.481  24.430  1.00 55.87           C  
ATOM   3590  N   VAL A 469      13.558  -9.992  24.234  1.00 46.44           N  
ATOM   3591  CA  VAL A 469      12.270  -9.964  24.898  1.00 44.15           C  
ATOM   3592  C   VAL A 469      11.137 -10.028  23.885  1.00 43.94           C  
ATOM   3593  O   VAL A 469      10.063 -10.547  24.184  1.00 45.08           O  
ATOM   3594  CB  VAL A 469      12.145  -8.689  25.767  1.00 43.67           C  
ATOM   3595  CG1 VAL A 469      10.694  -8.302  25.948  1.00 41.71           C  
ATOM   3596  CG2 VAL A 469      12.803  -8.932  27.117  1.00 44.34           C  
ATOM   3597  N   SER A 470      11.379  -9.507  22.684  1.00 44.37           N  
ATOM   3598  CA  SER A 470      10.365  -9.519  21.627  1.00 43.95           C  
ATOM   3599  C   SER A 470      10.955  -9.663  20.225  1.00 43.59           C  
ATOM   3600  O   SER A 470      11.913  -8.984  19.863  1.00 41.07           O  
ATOM   3601  CB  SER A 470       9.518  -8.244  21.684  1.00 43.85           C  
ATOM   3602  OG  SER A 470       8.350  -8.384  20.890  1.00 42.67           O  
ATOM   3603  N   ASP A 471      10.372 -10.555  19.435  1.00 44.26           N  
ATOM   3604  CA  ASP A 471      10.837 -10.765  18.071  1.00 46.38           C  
ATOM   3605  C   ASP A 471      10.635  -9.476  17.281  1.00 45.14           C  
ATOM   3606  O   ASP A 471      11.459  -9.110  16.439  1.00 45.66           O  
ATOM   3607  CB  ASP A 471      10.052 -11.901  17.416  1.00 46.92           C  
ATOM   3608  CG  ASP A 471       8.560 -11.650  17.415  1.00 48.70           C  
ATOM   3609  OD1 ASP A 471       8.078 -10.868  18.259  1.00 53.14           O  
ATOM   3610  OD2 ASP A 471       7.864 -12.235  16.567  1.00 51.42           O  
ATOM   3611  N   ARG A 472       9.534  -8.792  17.570  1.00 42.84           N  
ATOM   3612  CA  ARG A 472       9.198  -7.543  16.908  1.00 44.28           C  
ATOM   3613  C   ARG A 472      10.311  -6.514  17.029  1.00 46.25           C  
ATOM   3614  O   ARG A 472      10.696  -5.884  16.043  1.00 47.19           O  
ATOM   3615  CB  ARG A 472       7.917  -6.975  17.499  1.00 43.74           C  
ATOM   3616  CG  ARG A 472       6.676  -7.477  16.805  1.00 47.59           C  
ATOM   3617  CD  ARG A 472       5.560  -7.724  17.787  1.00 49.77           C  
ATOM   3618  NE  ARG A 472       4.549  -6.674  17.723  1.00 54.53           N  
ATOM   3619  CZ  ARG A 472       4.220  -5.887  18.742  1.00 54.46           C  
ATOM   3620  NH1 ARG A 472       4.819  -6.034  19.916  1.00 52.89           N  
ATOM   3621  NH2 ARG A 472       3.285  -4.959  18.589  1.00 54.37           N  
ATOM   3622  N   VAL A 473      10.822  -6.334  18.242  1.00 46.72           N  
ATOM   3623  CA  VAL A 473      11.896  -5.380  18.465  1.00 47.34           C  
ATOM   3624  C   VAL A 473      13.137  -5.875  17.727  1.00 49.32           C  
ATOM   3625  O   VAL A 473      13.849  -5.093  17.093  1.00 50.76           O  
ATOM   3626  CB  VAL A 473      12.205  -5.233  19.976  1.00 45.55           C  
ATOM   3627  CG1 VAL A 473      13.425  -4.345  20.193  1.00 44.87           C  
ATOM   3628  CG2 VAL A 473      11.006  -4.651  20.682  1.00 44.94           C  
ATOM   3629  N   THR A 474      13.382  -7.182  17.809  1.00 50.98           N  
ATOM   3630  CA  THR A 474      14.529  -7.807  17.152  1.00 50.15           C  
ATOM   3631  C   THR A 474      14.474  -7.553  15.651  1.00 48.55           C  
ATOM   3632  O   THR A 474      15.489  -7.263  15.026  1.00 45.85           O  
ATOM   3633  CB  THR A 474      14.545  -9.324  17.394  1.00 50.79           C  
ATOM   3634  OG1 THR A 474      14.933  -9.584  18.746  1.00 50.53           O  
ATOM   3635  CG2 THR A 474      15.523 -10.000  16.457  1.00 49.57           C  
ATOM   3636  N   LYS A 475      13.279  -7.670  15.084  1.00 48.22           N  
ATOM   3637  CA  LYS A 475      13.081  -7.432  13.660  1.00 50.41           C  
ATOM   3638  C   LYS A 475      13.580  -6.031  13.289  1.00 50.73           C  
ATOM   3639  O   LYS A 475      14.456  -5.875  12.435  1.00 53.33           O  
ATOM   3640  CB  LYS A 475      11.596  -7.565  13.314  1.00 50.76           C  
ATOM   3641  CG  LYS A 475      11.211  -6.969  11.975  1.00 53.14           C  
ATOM   3642  CD  LYS A 475      11.476  -7.952  10.854  1.00 58.24           C  
ATOM   3643  CE  LYS A 475      11.186  -7.333   9.496  1.00 61.95           C  
ATOM   3644  NZ  LYS A 475       9.731  -7.354   9.175  1.00 63.07           N  
ATOM   3645  N   CYS A 476      13.017  -5.016  13.937  1.00 49.00           N  
ATOM   3646  CA  CYS A 476      13.396  -3.628  13.694  1.00 45.59           C  
ATOM   3647  C   CYS A 476      14.884  -3.391  13.931  1.00 45.19           C  
ATOM   3648  O   CYS A 476      15.520  -2.619  13.212  1.00 46.45           O  
ATOM   3649  CB  CYS A 476      12.599  -2.707  14.619  1.00 45.27           C  
ATOM   3650  SG  CYS A 476      10.806  -2.826  14.387  1.00 43.76           S  
ATOM   3651  N   CYS A 477      15.428  -4.055  14.947  1.00 44.22           N  
ATOM   3652  CA  CYS A 477      16.830  -3.915  15.324  1.00 43.78           C  
ATOM   3653  C   CYS A 477      17.806  -4.527  14.332  1.00 44.88           C  
ATOM   3654  O   CYS A 477      18.957  -4.097  14.231  1.00 45.31           O  
ATOM   3655  CB  CYS A 477      17.056  -4.555  16.689  1.00 44.60           C  
ATOM   3656  SG  CYS A 477      16.539  -3.540  18.100  1.00 47.42           S  
ATOM   3657  N   THR A 478      17.346  -5.548  13.619  1.00 47.23           N  
ATOM   3658  CA  THR A 478      18.175  -6.238  12.638  1.00 49.53           C  
ATOM   3659  C   THR A 478      17.770  -5.853  11.211  1.00 52.48           C  
ATOM   3660  O   THR A 478      18.070  -6.563  10.255  1.00 53.27           O  
ATOM   3661  CB  THR A 478      18.060  -7.774  12.800  1.00 46.62           C  
ATOM   3662  OG1 THR A 478      16.687  -8.170  12.679  1.00 45.01           O  
ATOM   3663  CG2 THR A 478      18.593  -8.212  14.153  1.00 44.16           C  
ATOM   3664  N   GLU A 479      17.079  -4.727  11.084  1.00 54.88           N  
ATOM   3665  CA  GLU A 479      16.639  -4.224   9.788  1.00 56.67           C  
ATOM   3666  C   GLU A 479      17.669  -3.205   9.287  1.00 57.31           C  
ATOM   3667  O   GLU A 479      18.597  -2.847  10.019  1.00 57.02           O  
ATOM   3668  CB  GLU A 479      15.271  -3.555   9.935  1.00 56.72           C  
ATOM   3669  CG  GLU A 479      14.561  -3.315   8.629  1.00 61.09           C  
ATOM   3670  CD  GLU A 479      13.401  -4.253   8.436  1.00 63.58           C  
ATOM   3671  OE1 GLU A 479      13.043  -4.954   9.404  1.00 65.15           O  
ATOM   3672  OE2 GLU A 479      12.850  -4.288   7.319  1.00 65.97           O  
ATOM   3673  N   SER A 480      17.516  -2.746   8.045  1.00 58.43           N  
ATOM   3674  CA  SER A 480      18.441  -1.757   7.488  1.00 59.51           C  
ATOM   3675  C   SER A 480      18.289  -0.461   8.272  1.00 59.86           C  
ATOM   3676  O   SER A 480      17.179  -0.081   8.651  1.00 60.04           O  
ATOM   3677  CB  SER A 480      18.144  -1.499   6.007  1.00 58.72           C  
ATOM   3678  OG  SER A 480      16.766  -1.240   5.799  1.00 59.73           O  
ATOM   3679  N   LEU A 481      19.401   0.221   8.514  1.00 60.08           N  
ATOM   3680  CA  LEU A 481      19.358   1.462   9.272  1.00 60.44           C  
ATOM   3681  C   LEU A 481      18.390   2.460   8.654  1.00 57.99           C  
ATOM   3682  O   LEU A 481      18.025   3.454   9.278  1.00 58.94           O  
ATOM   3683  CB  LEU A 481      20.761   2.071   9.376  1.00 63.92           C  
ATOM   3684  CG  LEU A 481      21.652   1.609  10.546  1.00 66.21           C  
ATOM   3685  CD1 LEU A 481      22.216   2.833  11.259  1.00 67.47           C  
ATOM   3686  CD2 LEU A 481      20.867   0.740  11.532  1.00 66.57           C  
ATOM   3687  N   VAL A 482      17.959   2.181   7.432  1.00 54.07           N  
ATOM   3688  CA  VAL A 482      17.031   3.063   6.753  1.00 51.45           C  
ATOM   3689  C   VAL A 482      15.587   2.740   7.142  1.00 49.55           C  
ATOM   3690  O   VAL A 482      14.705   3.593   7.056  1.00 48.59           O  
ATOM   3691  CB  VAL A 482      17.237   2.961   5.229  1.00 52.71           C  
ATOM   3692  CG1 VAL A 482      15.993   3.385   4.484  1.00 53.03           C  
ATOM   3693  CG2 VAL A 482      18.417   3.831   4.827  1.00 53.12           C  
ATOM   3694  N   ASN A 483      15.349   1.510   7.586  1.00 47.62           N  
ATOM   3695  CA  ASN A 483      14.006   1.102   7.993  1.00 48.00           C  
ATOM   3696  C   ASN A 483      13.860   1.018   9.509  1.00 44.96           C  
ATOM   3697  O   ASN A 483      12.748   0.974  10.019  1.00 46.46           O  
ATOM   3698  CB  ASN A 483      13.652  -0.269   7.412  1.00 51.94           C  
ATOM   3699  CG  ASN A 483      13.883  -0.351   5.932  1.00 55.12           C  
ATOM   3700  OD1 ASN A 483      13.882   0.668   5.244  1.00 59.06           O  
ATOM   3701  ND2 ASN A 483      14.082  -1.567   5.425  1.00 54.41           N  
ATOM   3702  N   ARG A 484      14.982   0.977  10.216  1.00 40.11           N  
ATOM   3703  CA  ARG A 484      14.988   0.870  11.668  1.00 39.42           C  
ATOM   3704  C   ARG A 484      13.888   1.664  12.374  1.00 39.07           C  
ATOM   3705  O   ARG A 484      13.001   1.085  13.000  1.00 37.83           O  
ATOM   3706  CB  ARG A 484      16.345   1.311  12.194  1.00 40.00           C  
ATOM   3707  CG  ARG A 484      16.608   0.943  13.627  1.00 39.88           C  
ATOM   3708  CD  ARG A 484      18.068   1.195  13.965  1.00 42.43           C  
ATOM   3709  NE  ARG A 484      18.808  -0.052  14.125  1.00 43.53           N  
ATOM   3710  CZ  ARG A 484      19.955  -0.159  14.785  1.00 46.44           C  
ATOM   3711  NH1 ARG A 484      20.494   0.912  15.357  1.00 45.76           N  
ATOM   3712  NH2 ARG A 484      20.550  -1.340  14.890  1.00 48.50           N  
ATOM   3713  N   ARG A 485      13.947   2.987  12.266  1.00 37.45           N  
ATOM   3714  CA  ARG A 485      12.971   3.858  12.910  1.00 34.52           C  
ATOM   3715  C   ARG A 485      11.546   3.626  12.430  1.00 34.71           C  
ATOM   3716  O   ARG A 485      10.641   3.438  13.236  1.00 37.25           O  
ATOM   3717  CB  ARG A 485      13.356   5.325  12.698  1.00 32.86           C  
ATOM   3718  CG  ARG A 485      12.715   6.280  13.680  1.00 30.66           C  
ATOM   3719  CD  ARG A 485      11.284   6.587  13.277  1.00 30.45           C  
ATOM   3720  NE  ARG A 485      11.239   7.345  12.033  1.00 34.77           N  
ATOM   3721  CZ  ARG A 485      10.247   7.293  11.149  1.00 35.28           C  
ATOM   3722  NH1 ARG A 485       9.194   6.514  11.361  1.00 36.81           N  
ATOM   3723  NH2 ARG A 485      10.313   8.022  10.041  1.00 38.58           N  
ATOM   3724  N   PRO A 486      11.318   3.663  11.108  1.00 36.63           N  
ATOM   3725  CA  PRO A 486       9.954   3.442  10.615  1.00 34.46           C  
ATOM   3726  C   PRO A 486       9.388   2.098  11.067  1.00 34.95           C  
ATOM   3727  O   PRO A 486       8.170   1.916  11.129  1.00 35.06           O  
ATOM   3728  CB  PRO A 486      10.099   3.526   9.095  1.00 32.69           C  
ATOM   3729  CG  PRO A 486      11.362   4.291   8.869  1.00 33.61           C  
ATOM   3730  CD  PRO A 486      12.265   3.929  10.009  1.00 36.72           C  
ATOM   3731  N   CYS A 487      10.276   1.157  11.374  1.00 35.73           N  
ATOM   3732  CA  CYS A 487       9.858  -0.167  11.832  1.00 37.84           C  
ATOM   3733  C   CYS A 487       9.228  -0.030  13.215  1.00 37.72           C  
ATOM   3734  O   CYS A 487       8.138  -0.549  13.475  1.00 35.64           O  
ATOM   3735  CB  CYS A 487      11.061  -1.114  11.904  1.00 38.69           C  
ATOM   3736  SG  CYS A 487      10.648  -2.831  12.368  1.00 43.10           S  
ATOM   3737  N   PHE A 488       9.932   0.682  14.092  1.00 37.55           N  
ATOM   3738  CA  PHE A 488       9.469   0.924  15.448  1.00 38.10           C  
ATOM   3739  C   PHE A 488       8.182   1.724  15.405  1.00 38.65           C  
ATOM   3740  O   PHE A 488       7.231   1.413  16.115  1.00 41.80           O  
ATOM   3741  CB  PHE A 488      10.529   1.680  16.237  1.00 35.42           C  
ATOM   3742  CG  PHE A 488      11.630   0.800  16.754  1.00 37.73           C  
ATOM   3743  CD1 PHE A 488      11.395  -0.084  17.805  1.00 38.67           C  
ATOM   3744  CD2 PHE A 488      12.906   0.853  16.195  1.00 38.53           C  
ATOM   3745  CE1 PHE A 488      12.416  -0.902  18.296  1.00 40.03           C  
ATOM   3746  CE2 PHE A 488      13.941   0.040  16.675  1.00 39.32           C  
ATOM   3747  CZ  PHE A 488      13.694  -0.840  17.729  1.00 39.69           C  
ATOM   3748  N   SER A 489       8.145   2.744  14.556  1.00 37.18           N  
ATOM   3749  CA  SER A 489       6.955   3.573  14.429  1.00 36.07           C  
ATOM   3750  C   SER A 489       5.751   2.737  14.016  1.00 37.04           C  
ATOM   3751  O   SER A 489       4.604   3.124  14.261  1.00 37.98           O  
ATOM   3752  CB  SER A 489       7.182   4.675  13.392  1.00 33.10           C  
ATOM   3753  OG  SER A 489       8.201   5.562  13.810  1.00 31.37           O  
ATOM   3754  N   ALA A 490       6.014   1.585  13.401  1.00 37.89           N  
ATOM   3755  CA  ALA A 490       4.942   0.711  12.922  1.00 39.40           C  
ATOM   3756  C   ALA A 490       4.456  -0.294  13.949  1.00 39.18           C  
ATOM   3757  O   ALA A 490       3.414  -0.927  13.750  1.00 38.61           O  
ATOM   3758  CB  ALA A 490       5.392  -0.026  11.662  1.00 39.71           C  
ATOM   3759  N   LEU A 491       5.214  -0.454  15.033  1.00 38.89           N  
ATOM   3760  CA  LEU A 491       4.832  -1.387  16.089  1.00 40.40           C  
ATOM   3761  C   LEU A 491       3.407  -1.071  16.510  1.00 42.78           C  
ATOM   3762  O   LEU A 491       3.006   0.092  16.555  1.00 43.86           O  
ATOM   3763  CB  LEU A 491       5.761  -1.252  17.293  1.00 37.23           C  
ATOM   3764  CG  LEU A 491       7.134  -1.915  17.167  1.00 37.92           C  
ATOM   3765  CD1 LEU A 491       7.973  -1.636  18.406  1.00 36.87           C  
ATOM   3766  CD2 LEU A 491       6.956  -3.406  16.969  1.00 37.87           C  
ATOM   3767  N   GLU A 492       2.633  -2.104  16.801  1.00 46.58           N  
ATOM   3768  CA  GLU A 492       1.255  -1.895  17.212  1.00 51.90           C  
ATOM   3769  C   GLU A 492       1.011  -2.392  18.633  1.00 52.81           C  
ATOM   3770  O   GLU A 492       1.857  -3.070  19.226  1.00 51.68           O  
ATOM   3771  CB  GLU A 492       0.315  -2.593  16.234  1.00 55.11           C  
ATOM   3772  CG  GLU A 492       0.490  -2.115  14.806  1.00 63.44           C  
ATOM   3773  CD  GLU A 492      -0.363  -2.889  13.824  1.00 68.02           C  
ATOM   3774  OE1 GLU A 492      -0.147  -4.115  13.694  1.00 69.08           O  
ATOM   3775  OE2 GLU A 492      -1.246  -2.270  13.186  1.00 71.35           O  
ATOM   3776  N   VAL A 493      -0.142  -2.029  19.185  1.00 53.44           N  
ATOM   3777  CA  VAL A 493      -0.492  -2.453  20.530  1.00 53.97           C  
ATOM   3778  C   VAL A 493      -0.438  -3.979  20.583  1.00 55.54           C  
ATOM   3779  O   VAL A 493      -0.921  -4.661  19.674  1.00 56.62           O  
ATOM   3780  CB  VAL A 493      -1.906  -1.958  20.906  1.00 51.69           C  
ATOM   3781  CG1 VAL A 493      -2.549  -2.893  21.916  1.00 51.91           C  
ATOM   3782  CG2 VAL A 493      -1.816  -0.559  21.467  1.00 50.77           C  
ATOM   3783  N   ASP A 494       0.171  -4.512  21.636  1.00 56.33           N  
ATOM   3784  CA  ASP A 494       0.272  -5.955  21.794  1.00 57.39           C  
ATOM   3785  C   ASP A 494      -1.007  -6.507  22.413  1.00 59.59           C  
ATOM   3786  O   ASP A 494      -1.190  -6.437  23.627  1.00 61.12           O  
ATOM   3787  CB  ASP A 494       1.458  -6.299  22.684  1.00 54.72           C  
ATOM   3788  CG  ASP A 494       1.827  -7.756  22.613  1.00 53.72           C  
ATOM   3789  OD1 ASP A 494       1.004  -8.551  22.113  1.00 54.27           O  
ATOM   3790  OD2 ASP A 494       2.939  -8.105  23.054  1.00 53.21           O  
ATOM   3791  N   GLU A 495      -1.892  -7.045  21.576  1.00 62.24           N  
ATOM   3792  CA  GLU A 495      -3.156  -7.606  22.049  1.00 64.44           C  
ATOM   3793  C   GLU A 495      -2.979  -9.078  22.411  1.00 66.24           C  
ATOM   3794  O   GLU A 495      -3.955  -9.792  22.644  1.00 66.68           O  
ATOM   3795  CB  GLU A 495      -4.245  -7.452  20.982  1.00 62.14           C  
ATOM   3796  N   THR A 496      -1.723  -9.519  22.451  1.00 68.08           N  
ATOM   3797  CA  THR A 496      -1.373 -10.898  22.798  1.00 69.25           C  
ATOM   3798  C   THR A 496      -1.042 -10.928  24.282  1.00 69.49           C  
ATOM   3799  O   THR A 496      -1.381 -11.874  24.999  1.00 70.73           O  
ATOM   3800  CB  THR A 496      -0.117 -11.375  22.030  1.00 69.79           C  
ATOM   3801  OG1 THR A 496      -0.473 -11.693  20.681  1.00 72.00           O  
ATOM   3802  CG2 THR A 496       0.492 -12.610  22.699  1.00 69.41           C  
ATOM   3803  N   TYR A 497      -0.364  -9.871  24.716  1.00 68.41           N  
ATOM   3804  CA  TYR A 497       0.060  -9.706  26.095  1.00 65.83           C  
ATOM   3805  C   TYR A 497      -1.034 -10.061  27.091  1.00 66.49           C  
ATOM   3806  O   TYR A 497      -2.203  -9.696  26.918  1.00 66.04           O  
ATOM   3807  CB  TYR A 497       0.504  -8.264  26.323  1.00 62.05           C  
ATOM   3808  CG  TYR A 497       0.959  -7.977  27.730  1.00 57.30           C  
ATOM   3809  CD1 TYR A 497       2.143  -8.516  28.217  1.00 55.43           C  
ATOM   3810  CD2 TYR A 497       0.219  -7.139  28.567  1.00 56.50           C  
ATOM   3811  CE1 TYR A 497       2.586  -8.227  29.499  1.00 55.92           C  
ATOM   3812  CE2 TYR A 497       0.652  -6.842  29.854  1.00 54.69           C  
ATOM   3813  CZ  TYR A 497       1.839  -7.388  30.311  1.00 55.96           C  
ATOM   3814  OH  TYR A 497       2.295  -7.092  31.574  1.00 58.57           O  
ATOM   3815  N   VAL A 498      -0.636 -10.780  28.133  1.00 66.05           N  
ATOM   3816  CA  VAL A 498      -1.549 -11.190  29.187  1.00 65.42           C  
ATOM   3817  C   VAL A 498      -1.256 -10.340  30.418  1.00 64.23           C  
ATOM   3818  O   VAL A 498      -0.183 -10.454  31.009  1.00 62.96           O  
ATOM   3819  CB  VAL A 498      -1.353 -12.671  29.548  1.00 66.82           C  
ATOM   3820  CG1 VAL A 498      -2.557 -13.471  29.081  1.00 66.28           C  
ATOM   3821  CG2 VAL A 498      -0.061 -13.203  28.916  1.00 68.34           C  
ATOM   3822  N   PRO A 499      -2.207  -9.471  30.811  1.00 63.61           N  
ATOM   3823  CA  PRO A 499      -2.064  -8.588  31.973  1.00 63.63           C  
ATOM   3824  C   PRO A 499      -1.344  -9.237  33.150  1.00 65.03           C  
ATOM   3825  O   PRO A 499      -1.657 -10.361  33.542  1.00 66.15           O  
ATOM   3826  CB  PRO A 499      -3.503  -8.216  32.312  1.00 62.64           C  
ATOM   3827  CG  PRO A 499      -4.197  -8.236  30.997  1.00 62.98           C  
ATOM   3828  CD  PRO A 499      -3.513  -9.288  30.150  1.00 63.38           C  
ATOM   3829  N   LYS A 500      -0.370  -8.526  33.707  1.00 66.29           N  
ATOM   3830  CA  LYS A 500       0.383  -9.043  34.837  1.00 67.86           C  
ATOM   3831  C   LYS A 500      -0.451  -8.959  36.118  1.00 69.71           C  
ATOM   3832  O   LYS A 500      -1.301  -8.076  36.275  1.00 68.55           O  
ATOM   3833  CB  LYS A 500       1.717  -8.290  34.975  1.00 66.99           C  
ATOM   3834  CG  LYS A 500       1.717  -7.103  35.921  1.00 67.39           C  
ATOM   3835  CD  LYS A 500       3.006  -7.064  36.750  1.00 68.00           C  
ATOM   3836  CE  LYS A 500       4.225  -6.655  35.918  1.00 67.00           C  
ATOM   3837  NZ  LYS A 500       5.455  -6.466  36.749  1.00 65.38           N  
ATOM   3838  N   GLU A 501      -0.204  -9.906  37.017  1.00 71.50           N  
ATOM   3839  CA  GLU A 501      -0.914 -10.018  38.286  1.00 72.37           C  
ATOM   3840  C   GLU A 501      -0.942  -8.767  39.149  1.00 70.95           C  
ATOM   3841  O   GLU A 501       0.084  -8.109  39.326  1.00 71.43           O  
ATOM   3842  CB  GLU A 501      -0.307 -11.163  39.099  1.00 76.64           C  
ATOM   3843  CG  GLU A 501      -1.230 -11.734  40.160  1.00 84.38           C  
ATOM   3844  CD  GLU A 501      -2.624 -12.020  39.631  1.00 88.41           C  
ATOM   3845  OE1 GLU A 501      -2.803 -12.025  38.393  1.00 89.74           O  
ATOM   3846  OE2 GLU A 501      -3.540 -12.240  40.457  1.00 90.93           O  
ATOM   3847  N   PHE A 502      -2.115  -8.449  39.701  1.00 69.04           N  
ATOM   3848  CA  PHE A 502      -2.222  -7.285  40.570  1.00 67.15           C  
ATOM   3849  C   PHE A 502      -1.302  -7.492  41.757  1.00 65.87           C  
ATOM   3850  O   PHE A 502      -1.264  -8.574  42.340  1.00 65.85           O  
ATOM   3851  CB  PHE A 502      -3.640  -7.073  41.101  1.00 65.53           C  
ATOM   3852  CG  PHE A 502      -3.721  -5.971  42.121  1.00 66.30           C  
ATOM   3853  CD1 PHE A 502      -3.894  -4.651  41.724  1.00 65.65           C  
ATOM   3854  CD2 PHE A 502      -3.533  -6.239  43.475  1.00 67.43           C  
ATOM   3855  CE1 PHE A 502      -3.866  -3.613  42.659  1.00 67.52           C  
ATOM   3856  CE2 PHE A 502      -3.504  -5.208  44.417  1.00 66.78           C  
ATOM   3857  CZ  PHE A 502      -3.670  -3.894  44.008  1.00 66.40           C  
ATOM   3858  N   ASN A 503      -0.565  -6.449  42.113  1.00 65.77           N  
ATOM   3859  CA  ASN A 503       0.357  -6.526  43.233  1.00 66.35           C  
ATOM   3860  C   ASN A 503       0.180  -5.348  44.173  1.00 66.94           C  
ATOM   3861  O   ASN A 503       0.561  -4.224  43.847  1.00 67.60           O  
ATOM   3862  CB  ASN A 503       1.797  -6.558  42.737  1.00 66.54           C  
ATOM   3863  CG  ASN A 503       2.764  -6.963  43.819  1.00 67.30           C  
ATOM   3864  OD1 ASN A 503       2.965  -6.241  44.795  1.00 66.70           O  
ATOM   3865  ND2 ASN A 503       3.362  -8.133  43.660  1.00 69.99           N  
ATOM   3866  N   ALA A 504      -0.398  -5.613  45.341  1.00 66.50           N  
ATOM   3867  CA  ALA A 504      -0.625  -4.575  46.332  1.00 64.02           C  
ATOM   3868  C   ALA A 504       0.684  -3.859  46.640  1.00 62.20           C  
ATOM   3869  O   ALA A 504       0.738  -2.627  46.660  1.00 62.00           O  
ATOM   3870  CB  ALA A 504      -1.202  -5.186  47.599  1.00 64.73           C  
ATOM   3871  N   GLU A 505       1.739  -4.634  46.873  1.00 60.25           N  
ATOM   3872  CA  GLU A 505       3.049  -4.068  47.180  1.00 61.89           C  
ATOM   3873  C   GLU A 505       3.461  -3.034  46.129  1.00 63.56           C  
ATOM   3874  O   GLU A 505       4.023  -1.983  46.455  1.00 64.30           O  
ATOM   3875  CB  GLU A 505       4.098  -5.181  47.248  1.00 60.96           C  
ATOM   3876  N   THR A 506       3.164  -3.342  44.868  1.00 64.36           N  
ATOM   3877  CA  THR A 506       3.496  -2.471  43.742  1.00 62.21           C  
ATOM   3878  C   THR A 506       2.845  -1.092  43.831  1.00 62.02           C  
ATOM   3879  O   THR A 506       3.506  -0.078  43.619  1.00 61.69           O  
ATOM   3880  CB  THR A 506       3.097  -3.132  42.390  1.00 60.68           C  
ATOM   3881  OG1 THR A 506       4.099  -4.083  42.009  1.00 59.64           O  
ATOM   3882  CG2 THR A 506       2.969  -2.089  41.291  1.00 59.07           C  
ATOM   3883  N   PHE A 507       1.557  -1.046  44.145  1.00 62.26           N  
ATOM   3884  CA  PHE A 507       0.861   0.232  44.234  1.00 64.19           C  
ATOM   3885  C   PHE A 507       0.692   0.704  45.669  1.00 64.93           C  
ATOM   3886  O   PHE A 507      -0.344   1.248  46.054  1.00 63.58           O  
ATOM   3887  CB  PHE A 507      -0.484   0.126  43.519  1.00 64.75           C  
ATOM   3888  CG  PHE A 507      -0.373  -0.458  42.142  1.00 65.55           C  
ATOM   3889  CD1 PHE A 507       0.043   0.330  41.070  1.00 65.70           C  
ATOM   3890  CD2 PHE A 507      -0.634  -1.809  41.922  1.00 65.08           C  
ATOM   3891  CE1 PHE A 507       0.202  -0.217  39.801  1.00 64.82           C  
ATOM   3892  CE2 PHE A 507      -0.478  -2.368  40.656  1.00 65.10           C  
ATOM   3893  CZ  PHE A 507      -0.059  -1.571  39.593  1.00 64.72           C  
ATOM   3894  N   THR A 508       1.746   0.491  46.446  1.00 66.43           N  
ATOM   3895  CA  THR A 508       1.797   0.882  47.845  1.00 67.97           C  
ATOM   3896  C   THR A 508       2.911   1.908  47.979  1.00 68.91           C  
ATOM   3897  O   THR A 508       4.075   1.587  47.755  1.00 69.88           O  
ATOM   3898  CB  THR A 508       2.133  -0.320  48.728  1.00 67.38           C  
ATOM   3899  OG1 THR A 508       0.977  -1.156  48.848  1.00 67.39           O  
ATOM   3900  CG2 THR A 508       2.576   0.142  50.104  1.00 69.04           C  
ATOM   3901  N   PHE A 509       2.561   3.134  48.348  1.00 70.21           N  
ATOM   3902  CA  PHE A 509       3.557   4.191  48.476  1.00 72.88           C  
ATOM   3903  C   PHE A 509       3.604   4.792  49.871  1.00 75.02           C  
ATOM   3904  O   PHE A 509       2.588   4.894  50.553  1.00 76.40           O  
ATOM   3905  CB  PHE A 509       3.272   5.277  47.445  1.00 71.81           C  
ATOM   3906  CG  PHE A 509       2.201   4.896  46.484  1.00 73.46           C  
ATOM   3907  CD1 PHE A 509       0.868   4.964  46.866  1.00 74.93           C  
ATOM   3908  CD2 PHE A 509       2.519   4.398  45.226  1.00 73.02           C  
ATOM   3909  CE1 PHE A 509      -0.139   4.535  46.017  1.00 76.29           C  
ATOM   3910  CE2 PHE A 509       1.520   3.965  44.364  1.00 73.75           C  
ATOM   3911  CZ  PHE A 509       0.185   4.033  44.761  1.00 76.12           C  
ATOM   3912  N   HIS A 510       4.801   5.190  50.284  1.00 77.98           N  
ATOM   3913  CA  HIS A 510       5.008   5.777  51.599  1.00 79.89           C  
ATOM   3914  C   HIS A 510       5.271   7.278  51.517  1.00 80.81           C  
ATOM   3915  O   HIS A 510       5.215   7.871  50.440  1.00 82.80           O  
ATOM   3916  CB  HIS A 510       6.174   5.072  52.283  1.00 81.25           C  
ATOM   3917  CG  HIS A 510       5.988   3.595  52.403  1.00 84.50           C  
ATOM   3918  ND1 HIS A 510       5.053   3.029  53.245  1.00 86.23           N  
ATOM   3919  CD2 HIS A 510       6.603   2.563  51.775  1.00 86.37           C  
ATOM   3920  CE1 HIS A 510       5.101   1.714  53.130  1.00 86.56           C  
ATOM   3921  NE2 HIS A 510       6.028   1.404  52.249  1.00 87.26           N  
ATOM   3922  N   ALA A 511       5.565   7.887  52.661  1.00 80.18           N  
ATOM   3923  CA  ALA A 511       5.821   9.320  52.726  1.00 78.34           C  
ATOM   3924  C   ALA A 511       7.206   9.708  52.235  1.00 77.99           C  
ATOM   3925  O   ALA A 511       7.503  10.894  52.103  1.00 76.97           O  
ATOM   3926  CB  ALA A 511       5.630   9.809  54.144  1.00 79.25           C  
ATOM   3927  N   ASP A 512       8.052   8.717  51.970  1.00 78.18           N  
ATOM   3928  CA  ASP A 512       9.403   8.995  51.500  1.00 78.28           C  
ATOM   3929  C   ASP A 512       9.379   9.863  50.254  1.00 78.65           C  
ATOM   3930  O   ASP A 512      10.261  10.694  50.057  1.00 79.19           O  
ATOM   3931  CB  ASP A 512      10.157   7.701  51.188  1.00 78.57           C  
ATOM   3932  CG  ASP A 512       9.264   6.484  51.207  1.00 79.89           C  
ATOM   3933  OD1 ASP A 512       8.972   5.993  52.316  1.00 81.19           O  
ATOM   3934  OD2 ASP A 512       8.858   6.018  50.120  1.00 80.11           O  
ATOM   3935  N   ILE A 513       8.365   9.676  49.416  1.00 78.18           N  
ATOM   3936  CA  ILE A 513       8.261  10.445  48.185  1.00 77.79           C  
ATOM   3937  C   ILE A 513       8.307  11.956  48.407  1.00 78.59           C  
ATOM   3938  O   ILE A 513       8.886  12.686  47.601  1.00 79.63           O  
ATOM   3939  CB  ILE A 513       6.981  10.082  47.401  1.00 76.43           C  
ATOM   3940  CG1 ILE A 513       5.746  10.365  48.247  1.00 75.96           C  
ATOM   3941  CG2 ILE A 513       7.011   8.612  47.006  1.00 75.36           C  
ATOM   3942  CD1 ILE A 513       4.453  10.258  47.466  1.00 76.26           C  
ATOM   3943  N   CYS A 514       7.716  12.431  49.499  1.00 79.37           N  
ATOM   3944  CA  CYS A 514       7.718  13.865  49.785  1.00 79.94           C  
ATOM   3945  C   CYS A 514       9.136  14.376  50.035  1.00 79.42           C  
ATOM   3946  O   CYS A 514       9.422  15.558  49.845  1.00 78.67           O  
ATOM   3947  CB  CYS A 514       6.842  14.182  51.004  1.00 80.83           C  
ATOM   3948  SG  CYS A 514       5.477  13.019  51.335  1.00 80.67           S  
ATOM   3949  N   THR A 515      10.016  13.477  50.464  1.00 79.13           N  
ATOM   3950  CA  THR A 515      11.397  13.838  50.748  1.00 79.09           C  
ATOM   3951  C   THR A 515      12.269  13.769  49.492  1.00 79.98           C  
ATOM   3952  O   THR A 515      13.144  14.613  49.292  1.00 82.55           O  
ATOM   3953  CB  THR A 515      12.005  12.922  51.856  1.00 78.77           C  
ATOM   3954  OG1 THR A 515      12.412  11.667  51.293  1.00 78.98           O  
ATOM   3955  CG2 THR A 515      10.980  12.660  52.947  1.00 77.18           C  
ATOM   3956  N   LEU A 516      12.016  12.777  48.640  1.00 78.38           N  
ATOM   3957  CA  LEU A 516      12.788  12.582  47.412  1.00 75.68           C  
ATOM   3958  C   LEU A 516      12.848  13.811  46.506  1.00 75.64           C  
ATOM   3959  O   LEU A 516      12.029  14.727  46.628  1.00 74.33           O  
ATOM   3960  CB  LEU A 516      12.219  11.399  46.628  1.00 73.34           C  
ATOM   3961  CG  LEU A 516      12.244  10.058  47.363  1.00 72.38           C  
ATOM   3962  CD1 LEU A 516      11.277   9.088  46.707  1.00 72.23           C  
ATOM   3963  CD2 LEU A 516      13.655   9.499  47.345  1.00 71.56           C  
ATOM   3964  N   SER A 517      13.827  13.815  45.600  1.00 75.49           N  
ATOM   3965  CA  SER A 517      14.020  14.910  44.644  1.00 75.18           C  
ATOM   3966  C   SER A 517      13.029  14.800  43.484  1.00 74.32           C  
ATOM   3967  O   SER A 517      12.538  13.711  43.187  1.00 74.96           O  
ATOM   3968  CB  SER A 517      15.449  14.890  44.092  1.00 74.74           C  
ATOM   3969  OG  SER A 517      15.734  13.661  43.447  1.00 73.86           O  
ATOM   3970  N   GLU A 518      12.738  15.924  42.832  1.00 72.74           N  
ATOM   3971  CA  GLU A 518      11.806  15.929  41.708  1.00 70.99           C  
ATOM   3972  C   GLU A 518      12.166  14.784  40.772  1.00 69.86           C  
ATOM   3973  O   GLU A 518      11.292  14.126  40.216  1.00 67.85           O  
ATOM   3974  CB  GLU A 518      11.878  17.262  40.953  1.00 70.05           C  
ATOM   3975  N   LYS A 519      13.465  14.543  40.619  1.00 70.42           N  
ATOM   3976  CA  LYS A 519      13.953  13.474  39.760  1.00 71.57           C  
ATOM   3977  C   LYS A 519      13.449  12.117  40.243  1.00 72.61           C  
ATOM   3978  O   LYS A 519      12.929  11.323  39.455  1.00 74.00           O  
ATOM   3979  CB  LYS A 519      15.483  13.476  39.737  1.00 71.02           C  
ATOM   3980  CG  LYS A 519      16.087  12.511  38.730  1.00 72.03           C  
ATOM   3981  CD  LYS A 519      15.888  13.007  37.307  1.00 73.47           C  
ATOM   3982  N   GLU A 520      13.599  11.863  41.541  1.00 72.43           N  
ATOM   3983  CA  GLU A 520      13.174  10.600  42.141  1.00 71.40           C  
ATOM   3984  C   GLU A 520      11.659  10.480  42.274  1.00 68.47           C  
ATOM   3985  O   GLU A 520      11.100   9.395  42.114  1.00 68.33           O  
ATOM   3986  CB  GLU A 520      13.833  10.434  43.510  1.00 75.59           C  
ATOM   3987  CG  GLU A 520      15.347  10.611  43.492  1.00 80.97           C  
ATOM   3988  CD  GLU A 520      16.076   9.366  43.018  1.00 85.31           C  
ATOM   3989  OE1 GLU A 520      15.832   8.279  43.586  1.00 88.22           O  
ATOM   3990  OE2 GLU A 520      16.895   9.473  42.078  1.00 88.42           O  
ATOM   3991  N   ARG A 521      10.997  11.593  42.575  1.00 65.59           N  
ATOM   3992  CA  ARG A 521       9.547  11.599  42.706  1.00 63.27           C  
ATOM   3993  C   ARG A 521       8.977  11.128  41.381  1.00 60.82           C  
ATOM   3994  O   ARG A 521       8.075  10.295  41.337  1.00 59.98           O  
ATOM   3995  CB  ARG A 521       9.039  13.012  43.008  1.00 66.36           C  
ATOM   3996  CG  ARG A 521       9.452  13.550  44.377  1.00 70.63           C  
ATOM   3997  CD  ARG A 521       8.771  14.880  44.707  1.00 70.32           C  
ATOM   3998  NE  ARG A 521       9.294  15.466  45.941  1.00 69.48           N  
ATOM   3999  N   GLN A 522       9.526  11.673  40.300  1.00 59.73           N  
ATOM   4000  CA  GLN A 522       9.106  11.331  38.947  1.00 57.34           C  
ATOM   4001  C   GLN A 522       9.344   9.854  38.648  1.00 55.65           C  
ATOM   4002  O   GLN A 522       8.408   9.126  38.306  1.00 55.47           O  
ATOM   4003  CB  GLN A 522       9.871  12.174  37.928  1.00 58.97           C  
ATOM   4004  CG  GLN A 522       9.371  13.600  37.786  1.00 60.65           C  
ATOM   4005  CD  GLN A 522      10.299  14.450  36.938  1.00 61.58           C  
ATOM   4006  OE1 GLN A 522      11.420  14.041  36.626  1.00 60.53           O  
ATOM   4007  NE2 GLN A 522       9.838  15.639  36.561  1.00 60.30           N  
ATOM   4008  N   ILE A 523      10.595   9.415  38.770  1.00 52.00           N  
ATOM   4009  CA  ILE A 523      10.926   8.021  38.502  1.00 52.00           C  
ATOM   4010  C   ILE A 523      10.036   7.082  39.299  1.00 52.19           C  
ATOM   4011  O   ILE A 523       9.658   6.013  38.819  1.00 52.99           O  
ATOM   4012  CB  ILE A 523      12.386   7.700  38.855  1.00 53.66           C  
ATOM   4013  CG1 ILE A 523      13.332   8.691  38.177  1.00 53.78           C  
ATOM   4014  CG2 ILE A 523      12.717   6.288  38.408  1.00 54.37           C  
ATOM   4015  CD1 ILE A 523      12.888   9.125  36.804  1.00 55.54           C  
ATOM   4016  N   LYS A 524       9.706   7.481  40.522  1.00 51.49           N  
ATOM   4017  CA  LYS A 524       8.856   6.670  41.370  1.00 48.06           C  
ATOM   4018  C   LYS A 524       7.463   6.582  40.775  1.00 45.46           C  
ATOM   4019  O   LYS A 524       6.977   5.488  40.500  1.00 47.45           O  
ATOM   4020  CB  LYS A 524       8.790   7.266  42.770  1.00 51.95           C  
ATOM   4021  CG  LYS A 524       9.942   6.838  43.659  1.00 55.85           C  
ATOM   4022  CD  LYS A 524       9.756   5.409  44.160  1.00 59.05           C  
ATOM   4023  N   LYS A 525       6.822   7.727  40.565  1.00 41.31           N  
ATOM   4024  CA  LYS A 525       5.478   7.738  39.995  1.00 40.93           C  
ATOM   4025  C   LYS A 525       5.463   7.146  38.587  1.00 42.01           C  
ATOM   4026  O   LYS A 525       4.504   6.470  38.196  1.00 41.49           O  
ATOM   4027  CB  LYS A 525       4.923   9.164  39.932  1.00 40.46           C  
ATOM   4028  CG  LYS A 525       5.032   9.952  41.219  1.00 39.22           C  
ATOM   4029  CD  LYS A 525       5.262  11.423  40.930  1.00 40.30           C  
ATOM   4030  CE  LYS A 525       3.958  12.198  40.968  1.00 41.38           C  
ATOM   4031  NZ  LYS A 525       4.149  13.630  40.574  1.00 44.63           N  
ATOM   4032  N   GLN A 526       6.528   7.408  37.829  1.00 42.31           N  
ATOM   4033  CA  GLN A 526       6.645   6.922  36.453  1.00 40.41           C  
ATOM   4034  C   GLN A 526       6.665   5.406  36.370  1.00 39.35           C  
ATOM   4035  O   GLN A 526       6.048   4.820  35.474  1.00 36.81           O  
ATOM   4036  CB  GLN A 526       7.905   7.482  35.791  1.00 38.74           C  
ATOM   4037  CG  GLN A 526       7.602   8.430  34.651  1.00 37.70           C  
ATOM   4038  CD  GLN A 526       8.717   9.417  34.378  1.00 35.92           C  
ATOM   4039  OE1 GLN A 526       9.861   9.233  34.810  1.00 33.72           O  
ATOM   4040  NE2 GLN A 526       8.389  10.476  33.652  1.00 33.83           N  
ATOM   4041  N   THR A 527       7.372   4.776  37.306  1.00 37.72           N  
ATOM   4042  CA  THR A 527       7.459   3.324  37.336  1.00 36.12           C  
ATOM   4043  C   THR A 527       6.097   2.741  37.691  1.00 36.46           C  
ATOM   4044  O   THR A 527       5.734   1.653  37.230  1.00 36.41           O  
ATOM   4045  CB  THR A 527       8.480   2.843  38.373  1.00 38.00           C  
ATOM   4046  OG1 THR A 527       9.755   3.457  38.131  1.00 37.96           O  
ATOM   4047  CG2 THR A 527       8.628   1.332  38.293  1.00 40.52           C  
ATOM   4048  N   ALA A 528       5.343   3.478  38.505  1.00 36.76           N  
ATOM   4049  CA  ALA A 528       4.014   3.043  38.930  1.00 38.29           C  
ATOM   4050  C   ALA A 528       3.056   3.070  37.748  1.00 38.19           C  
ATOM   4051  O   ALA A 528       2.200   2.191  37.600  1.00 38.69           O  
ATOM   4052  CB  ALA A 528       3.494   3.947  40.048  1.00 36.77           C  
ATOM   4053  N   LEU A 529       3.207   4.093  36.911  1.00 37.94           N  
ATOM   4054  CA  LEU A 529       2.368   4.257  35.728  1.00 36.30           C  
ATOM   4055  C   LEU A 529       2.609   3.124  34.740  1.00 34.97           C  
ATOM   4056  O   LEU A 529       1.667   2.581  34.164  1.00 31.65           O  
ATOM   4057  CB  LEU A 529       2.672   5.588  35.048  1.00 35.14           C  
ATOM   4058  CG  LEU A 529       1.757   5.963  33.880  1.00 35.63           C  
ATOM   4059  CD1 LEU A 529       0.316   5.557  34.164  1.00 32.77           C  
ATOM   4060  CD2 LEU A 529       1.856   7.460  33.650  1.00 32.85           C  
ATOM   4061  N   VAL A 530       3.877   2.772  34.551  1.00 34.58           N  
ATOM   4062  CA  VAL A 530       4.221   1.698  33.636  1.00 36.26           C  
ATOM   4063  C   VAL A 530       3.526   0.442  34.124  1.00 36.21           C  
ATOM   4064  O   VAL A 530       2.794  -0.212  33.375  1.00 35.71           O  
ATOM   4065  CB  VAL A 530       5.753   1.435  33.597  1.00 37.31           C  
ATOM   4066  CG1 VAL A 530       6.045   0.177  32.785  1.00 36.97           C  
ATOM   4067  CG2 VAL A 530       6.476   2.623  32.981  1.00 38.39           C  
ATOM   4068  N   GLU A 531       3.759   0.119  35.394  1.00 36.54           N  
ATOM   4069  CA  GLU A 531       3.176  -1.065  36.017  1.00 35.06           C  
ATOM   4070  C   GLU A 531       1.641  -1.036  35.986  1.00 34.69           C  
ATOM   4071  O   GLU A 531       0.986  -2.078  35.838  1.00 33.00           O  
ATOM   4072  CB  GLU A 531       3.693  -1.187  37.450  1.00 35.40           C  
ATOM   4073  CG  GLU A 531       5.186  -1.528  37.539  1.00 35.17           C  
ATOM   4074  CD  GLU A 531       5.479  -2.984  37.188  1.00 37.32           C  
ATOM   4075  OE1 GLU A 531       4.516  -3.757  37.024  1.00 38.89           O  
ATOM   4076  OE2 GLU A 531       6.666  -3.361  37.075  1.00 38.07           O  
ATOM   4077  N   LEU A 532       1.062   0.152  36.115  1.00 33.09           N  
ATOM   4078  CA  LEU A 532      -0.384   0.259  36.064  1.00 35.21           C  
ATOM   4079  C   LEU A 532      -0.850  -0.162  34.665  1.00 37.83           C  
ATOM   4080  O   LEU A 532      -1.858  -0.859  34.522  1.00 40.47           O  
ATOM   4081  CB  LEU A 532      -0.830   1.690  36.372  1.00 32.30           C  
ATOM   4082  CG  LEU A 532      -2.275   2.017  35.968  1.00 35.38           C  
ATOM   4083  CD1 LEU A 532      -3.245   1.038  36.619  1.00 34.95           C  
ATOM   4084  CD2 LEU A 532      -2.605   3.438  36.376  1.00 33.71           C  
ATOM   4085  N   VAL A 533      -0.115   0.249  33.633  1.00 39.18           N  
ATOM   4086  CA  VAL A 533      -0.481  -0.118  32.259  1.00 40.96           C  
ATOM   4087  C   VAL A 533      -0.244  -1.621  32.039  1.00 40.75           C  
ATOM   4088  O   VAL A 533      -1.025  -2.292  31.358  1.00 39.02           O  
ATOM   4089  CB  VAL A 533       0.333   0.706  31.201  1.00 40.30           C  
ATOM   4090  CG1 VAL A 533      -0.010   0.242  29.790  1.00 39.27           C  
ATOM   4091  CG2 VAL A 533       0.021   2.192  31.336  1.00 38.93           C  
ATOM   4092  N   LYS A 534       0.828  -2.143  32.631  1.00 41.85           N  
ATOM   4093  CA  LYS A 534       1.159  -3.559  32.509  1.00 43.56           C  
ATOM   4094  C   LYS A 534       0.099  -4.427  33.168  1.00 47.21           C  
ATOM   4095  O   LYS A 534      -0.075  -5.583  32.784  1.00 48.00           O  
ATOM   4096  CB  LYS A 534       2.516  -3.853  33.149  1.00 41.36           C  
ATOM   4097  CG  LYS A 534       3.693  -3.304  32.368  1.00 41.92           C  
ATOM   4098  CD  LYS A 534       4.894  -4.230  32.429  1.00 37.90           C  
ATOM   4099  CE  LYS A 534       6.127  -3.543  31.876  1.00 34.57           C  
ATOM   4100  NZ  LYS A 534       7.318  -3.810  32.715  1.00 33.69           N  
ATOM   4101  N   HIS A 535      -0.609  -3.871  34.154  1.00 50.64           N  
ATOM   4102  CA  HIS A 535      -1.654  -4.614  34.863  1.00 51.59           C  
ATOM   4103  C   HIS A 535      -3.025  -4.524  34.186  1.00 50.15           C  
ATOM   4104  O   HIS A 535      -3.754  -5.515  34.099  1.00 48.76           O  
ATOM   4105  CB  HIS A 535      -1.763  -4.135  36.316  1.00 54.53           C  
ATOM   4106  CG  HIS A 535      -2.918  -4.739  37.059  1.00 58.25           C  
ATOM   4107  ND1 HIS A 535      -3.150  -6.098  37.095  1.00 58.76           N  
ATOM   4108  CD2 HIS A 535      -3.935  -4.165  37.745  1.00 57.80           C  
ATOM   4109  CE1 HIS A 535      -4.262  -6.335  37.768  1.00 57.91           C  
ATOM   4110  NE2 HIS A 535      -4.759  -5.179  38.174  1.00 57.66           N  
ATOM   4111  N   LYS A 536      -3.385  -3.333  33.725  1.00 49.74           N  
ATOM   4112  CA  LYS A 536      -4.660  -3.149  33.044  1.00 51.45           C  
ATOM   4113  C   LYS A 536      -4.383  -2.428  31.721  1.00 51.36           C  
ATOM   4114  O   LYS A 536      -4.713  -1.255  31.553  1.00 52.39           O  
ATOM   4115  CB  LYS A 536      -5.612  -2.344  33.926  1.00 53.54           C  
ATOM   4116  CG  LYS A 536      -6.250  -3.171  35.040  1.00 54.84           C  
ATOM   4117  CD  LYS A 536      -7.776  -3.109  34.982  1.00 58.67           C  
ATOM   4118  CE  LYS A 536      -8.410  -4.495  35.098  1.00 60.20           C  
ATOM   4119  NZ  LYS A 536      -7.656  -5.378  36.031  1.00 62.32           N  
ATOM   4120  N   PRO A 537      -3.774  -3.145  30.760  1.00 49.38           N  
ATOM   4121  CA  PRO A 537      -3.402  -2.660  29.428  1.00 48.05           C  
ATOM   4122  C   PRO A 537      -4.525  -2.197  28.511  1.00 48.61           C  
ATOM   4123  O   PRO A 537      -4.293  -1.383  27.619  1.00 48.88           O  
ATOM   4124  CB  PRO A 537      -2.638  -3.835  28.828  1.00 47.90           C  
ATOM   4125  CG  PRO A 537      -3.192  -5.032  29.527  1.00 48.44           C  
ATOM   4126  CD  PRO A 537      -3.414  -4.565  30.930  1.00 49.50           C  
ATOM   4127  N   LYS A 538      -5.732  -2.712  28.720  1.00 48.75           N  
ATOM   4128  CA  LYS A 538      -6.866  -2.344  27.878  1.00 48.52           C  
ATOM   4129  C   LYS A 538      -7.617  -1.109  28.373  1.00 50.06           C  
ATOM   4130  O   LYS A 538      -8.735  -0.833  27.930  1.00 50.73           O  
ATOM   4131  CB  LYS A 538      -7.831  -3.527  27.768  1.00 47.57           C  
ATOM   4132  N   ALA A 539      -6.994  -0.363  29.280  1.00 51.76           N  
ATOM   4133  CA  ALA A 539      -7.600   0.840  29.850  1.00 52.61           C  
ATOM   4134  C   ALA A 539      -7.489   2.063  28.935  1.00 52.77           C  
ATOM   4135  O   ALA A 539      -6.426   2.350  28.389  1.00 54.09           O  
ATOM   4136  CB  ALA A 539      -6.960   1.146  31.212  1.00 52.60           C  
ATOM   4137  N   THR A 540      -8.595   2.784  28.785  1.00 52.65           N  
ATOM   4138  CA  THR A 540      -8.640   3.981  27.956  1.00 54.12           C  
ATOM   4139  C   THR A 540      -7.624   5.019  28.413  1.00 57.01           C  
ATOM   4140  O   THR A 540      -7.098   4.940  29.522  1.00 57.64           O  
ATOM   4141  CB  THR A 540     -10.025   4.628  28.017  1.00 52.41           C  
ATOM   4142  OG1 THR A 540     -11.013   3.645  27.700  1.00 52.15           O  
ATOM   4143  CG2 THR A 540     -10.127   5.788  27.031  1.00 55.00           C  
ATOM   4144  N   LYS A 541      -7.345   5.992  27.551  1.00 60.57           N  
ATOM   4145  CA  LYS A 541      -6.412   7.054  27.900  1.00 63.05           C  
ATOM   4146  C   LYS A 541      -7.156   7.956  28.881  1.00 63.66           C  
ATOM   4147  O   LYS A 541      -6.545   8.663  29.683  1.00 63.91           O  
ATOM   4148  CB  LYS A 541      -5.996   7.843  26.651  1.00 64.03           C  
ATOM   4149  CG  LYS A 541      -4.631   7.435  26.073  1.00 64.96           C  
ATOM   4150  CD  LYS A 541      -4.306   8.175  24.770  1.00 63.57           C  
ATOM   4151  N   GLU A 542      -8.486   7.911  28.804  1.00 64.65           N  
ATOM   4152  CA  GLU A 542      -9.352   8.689  29.689  1.00 65.74           C  
ATOM   4153  C   GLU A 542      -9.316   8.042  31.069  1.00 63.45           C  
ATOM   4154  O   GLU A 542      -9.056   8.704  32.073  1.00 62.89           O  
ATOM   4155  CB  GLU A 542     -10.792   8.689  29.165  1.00 69.40           C  
ATOM   4156  CG  GLU A 542     -11.138   9.870  28.269  1.00 74.79           C  
ATOM   4157  CD  GLU A 542     -11.433  11.134  29.056  1.00 77.82           C  
ATOM   4158  OE1 GLU A 542     -10.522  11.615  29.769  1.00 79.76           O  
ATOM   4159  OE2 GLU A 542     -12.572  11.645  28.962  1.00 78.65           O  
ATOM   4160  N   GLN A 543      -9.583   6.739  31.099  1.00 60.45           N  
ATOM   4161  CA  GLN A 543      -9.564   5.977  32.334  1.00 58.63           C  
ATOM   4162  C   GLN A 543      -8.228   6.203  33.029  1.00 59.45           C  
ATOM   4163  O   GLN A 543      -8.175   6.439  34.235  1.00 61.75           O  
ATOM   4164  CB  GLN A 543      -9.733   4.487  32.040  1.00 56.66           C  
ATOM   4165  CG  GLN A 543     -11.158   4.068  31.753  1.00 59.56           C  
ATOM   4166  CD  GLN A 543     -11.249   2.648  31.227  1.00 62.22           C  
ATOM   4167  OE1 GLN A 543     -10.294   1.876  31.327  1.00 62.59           O  
ATOM   4168  NE2 GLN A 543     -12.401   2.296  30.661  1.00 63.80           N  
ATOM   4169  N   LEU A 544      -7.148   6.134  32.258  1.00 58.77           N  
ATOM   4170  CA  LEU A 544      -5.812   6.319  32.803  1.00 57.72           C  
ATOM   4171  C   LEU A 544      -5.611   7.711  33.384  1.00 57.12           C  
ATOM   4172  O   LEU A 544      -4.957   7.868  34.416  1.00 56.78           O  
ATOM   4173  CB  LEU A 544      -4.768   6.053  31.722  1.00 59.14           C  
ATOM   4174  CG  LEU A 544      -3.824   4.870  31.946  1.00 60.88           C  
ATOM   4175  CD1 LEU A 544      -4.486   3.796  32.807  1.00 60.05           C  
ATOM   4176  CD2 LEU A 544      -3.432   4.306  30.590  1.00 61.22           C  
ATOM   4177  N   LYS A 545      -6.162   8.721  32.717  1.00 56.67           N  
ATOM   4178  CA  LYS A 545      -6.049  10.095  33.193  1.00 55.35           C  
ATOM   4179  C   LYS A 545      -6.737  10.202  34.557  1.00 55.71           C  
ATOM   4180  O   LYS A 545      -6.151  10.694  35.523  1.00 55.40           O  
ATOM   4181  CB  LYS A 545      -6.710  11.059  32.201  1.00 54.04           C  
ATOM   4182  CG  LYS A 545      -6.593  12.534  32.576  1.00 53.06           C  
ATOM   4183  N   ALA A 546      -7.983   9.736  34.627  1.00 54.49           N  
ATOM   4184  CA  ALA A 546      -8.750   9.770  35.870  1.00 53.61           C  
ATOM   4185  C   ALA A 546      -7.928   9.186  37.015  1.00 53.10           C  
ATOM   4186  O   ALA A 546      -7.684   9.851  38.022  1.00 53.61           O  
ATOM   4187  CB  ALA A 546     -10.043   8.987  35.707  1.00 53.53           C  
ATOM   4188  N   VAL A 547      -7.507   7.938  36.852  1.00 51.71           N  
ATOM   4189  CA  VAL A 547      -6.706   7.251  37.858  1.00 50.31           C  
ATOM   4190  C   VAL A 547      -5.428   8.020  38.192  1.00 51.22           C  
ATOM   4191  O   VAL A 547      -4.899   7.907  39.293  1.00 52.07           O  
ATOM   4192  CB  VAL A 547      -6.320   5.836  37.375  1.00 47.68           C  
ATOM   4193  CG1 VAL A 547      -5.292   5.228  38.309  1.00 44.08           C  
ATOM   4194  CG2 VAL A 547      -7.562   4.963  37.284  1.00 44.94           C  
ATOM   4195  N   MET A 548      -4.933   8.803  37.242  1.00 53.07           N  
ATOM   4196  CA  MET A 548      -3.713   9.568  37.465  1.00 55.38           C  
ATOM   4197  C   MET A 548      -3.970  10.869  38.208  1.00 56.25           C  
ATOM   4198  O   MET A 548      -3.069  11.409  38.843  1.00 56.07           O  
ATOM   4199  CB  MET A 548      -3.026   9.867  36.134  1.00 56.91           C  
ATOM   4200  CG  MET A 548      -1.961   8.852  35.749  1.00 57.31           C  
ATOM   4201  SD  MET A 548      -1.255   9.119  34.106  1.00 55.18           S  
ATOM   4202  CE  MET A 548      -2.606   9.980  33.286  1.00 53.08           C  
ATOM   4203  N   ASP A 549      -5.196  11.375  38.114  1.00 59.67           N  
ATOM   4204  CA  ASP A 549      -5.571  12.610  38.796  1.00 62.85           C  
ATOM   4205  C   ASP A 549      -5.785  12.302  40.279  1.00 61.97           C  
ATOM   4206  O   ASP A 549      -5.329  13.042  41.155  1.00 62.58           O  
ATOM   4207  CB  ASP A 549      -6.859  13.182  38.194  1.00 67.88           C  
ATOM   4208  CG  ASP A 549      -6.634  13.849  36.841  1.00 73.03           C  
ATOM   4209  OD1 ASP A 549      -5.470  14.159  36.499  1.00 75.15           O  
ATOM   4210  OD2 ASP A 549      -7.632  14.066  36.117  1.00 76.53           O  
ATOM   4211  N   ASP A 550      -6.481  11.201  40.549  1.00 59.65           N  
ATOM   4212  CA  ASP A 550      -6.746  10.779  41.915  1.00 57.46           C  
ATOM   4213  C   ASP A 550      -5.416  10.609  42.636  1.00 55.74           C  
ATOM   4214  O   ASP A 550      -5.285  10.931  43.815  1.00 57.15           O  
ATOM   4215  CB  ASP A 550      -7.509   9.450  41.925  1.00 56.55           C  
ATOM   4216  CG  ASP A 550      -8.957   9.599  41.495  1.00 56.71           C  
ATOM   4217  OD1 ASP A 550      -9.398  10.748  41.270  1.00 57.10           O  
ATOM   4218  OD2 ASP A 550      -9.655   8.564  41.383  1.00 56.13           O  
ATOM   4219  N   PHE A 551      -4.425  10.103  41.916  1.00 53.15           N  
ATOM   4220  CA  PHE A 551      -3.112   9.889  42.495  1.00 53.32           C  
ATOM   4221  C   PHE A 551      -2.415  11.218  42.750  1.00 55.89           C  
ATOM   4222  O   PHE A 551      -1.734  11.389  43.758  1.00 55.74           O  
ATOM   4223  CB  PHE A 551      -2.267   9.031  41.559  1.00 48.51           C  
ATOM   4224  CG  PHE A 551      -0.928   8.664  42.122  1.00 44.20           C  
ATOM   4225  CD1 PHE A 551      -0.785   7.545  42.936  1.00 41.90           C  
ATOM   4226  CD2 PHE A 551       0.195   9.433  41.834  1.00 41.55           C  
ATOM   4227  CE1 PHE A 551       0.460   7.196  43.456  1.00 41.42           C  
ATOM   4228  CE2 PHE A 551       1.444   9.095  42.346  1.00 40.80           C  
ATOM   4229  CZ  PHE A 551       1.578   7.971  43.160  1.00 41.82           C  
ATOM   4230  N   ALA A 552      -2.581  12.155  41.825  1.00 60.07           N  
ATOM   4231  CA  ALA A 552      -1.969  13.470  41.962  1.00 64.23           C  
ATOM   4232  C   ALA A 552      -2.432  14.057  43.280  1.00 67.49           C  
ATOM   4233  O   ALA A 552      -1.630  14.527  44.086  1.00 68.41           O  
ATOM   4234  CB  ALA A 552      -2.403  14.367  40.819  1.00 65.35           C  
ATOM   4235  N   ALA A 553      -3.744  14.022  43.485  1.00 70.13           N  
ATOM   4236  CA  ALA A 553      -4.345  14.533  44.704  1.00 72.98           C  
ATOM   4237  C   ALA A 553      -3.838  13.746  45.915  1.00 74.39           C  
ATOM   4238  O   ALA A 553      -3.456  14.329  46.931  1.00 75.47           O  
ATOM   4239  CB  ALA A 553      -5.864  14.432  44.611  1.00 71.99           C  
ATOM   4240  N   PHE A 554      -3.829  12.421  45.791  1.00 74.67           N  
ATOM   4241  CA  PHE A 554      -3.392  11.543  46.869  1.00 74.20           C  
ATOM   4242  C   PHE A 554      -2.026  11.918  47.445  1.00 75.13           C  
ATOM   4243  O   PHE A 554      -1.898  12.105  48.650  1.00 75.91           O  
ATOM   4244  CB  PHE A 554      -3.393  10.092  46.377  1.00 74.12           C  
ATOM   4245  CG  PHE A 554      -2.557   9.162  47.205  1.00 74.94           C  
ATOM   4246  CD1 PHE A 554      -3.001   8.717  48.446  1.00 73.72           C  
ATOM   4247  CD2 PHE A 554      -1.328   8.714  46.731  1.00 74.87           C  
ATOM   4248  CE1 PHE A 554      -2.231   7.838  49.199  1.00 73.95           C  
ATOM   4249  CE2 PHE A 554      -0.553   7.837  47.475  1.00 74.74           C  
ATOM   4250  CZ  PHE A 554      -1.004   7.397  48.711  1.00 74.08           C  
ATOM   4251  N   VAL A 555      -1.008  12.037  46.599  1.00 76.65           N  
ATOM   4252  CA  VAL A 555       0.326  12.389  47.090  1.00 77.26           C  
ATOM   4253  C   VAL A 555       0.324  13.766  47.751  1.00 78.68           C  
ATOM   4254  O   VAL A 555       0.994  13.986  48.762  1.00 78.21           O  
ATOM   4255  CB  VAL A 555       1.372  12.384  45.949  1.00 75.39           C  
ATOM   4256  CG1 VAL A 555       2.713  12.919  46.455  1.00 73.53           C  
ATOM   4257  CG2 VAL A 555       1.536  10.978  45.414  1.00 73.01           C  
ATOM   4258  N   GLU A 556      -0.433  14.690  47.173  1.00 80.18           N  
ATOM   4259  CA  GLU A 556      -0.522  16.040  47.703  1.00 82.29           C  
ATOM   4260  C   GLU A 556      -1.187  16.026  49.074  1.00 83.27           C  
ATOM   4261  O   GLU A 556      -0.547  16.301  50.090  1.00 84.30           O  
ATOM   4262  CB  GLU A 556      -1.323  16.915  46.749  1.00 83.24           C  
ATOM   4263  CG  GLU A 556      -1.321  18.378  47.108  1.00 85.96           C  
ATOM   4264  CD  GLU A 556      -2.285  19.167  46.255  1.00 88.88           C  
ATOM   4265  OE1 GLU A 556      -3.035  18.539  45.478  1.00 90.31           O  
ATOM   4266  OE2 GLU A 556      -2.297  20.413  46.358  1.00 91.20           O  
ATOM   4267  N   LYS A 557      -2.473  15.697  49.094  1.00 83.13           N  
ATOM   4268  CA  LYS A 557      -3.239  15.639  50.333  1.00 83.06           C  
ATOM   4269  C   LYS A 557      -2.564  14.754  51.385  1.00 83.74           C  
ATOM   4270  O   LYS A 557      -3.074  14.604  52.494  1.00 86.01           O  
ATOM   4271  CB  LYS A 557      -4.654  15.120  50.039  1.00 81.43           C  
ATOM   4272  CG  LYS A 557      -5.575  15.044  51.244  1.00 79.52           C  
ATOM   4273  N   CYS A 558      -1.414  14.179  51.045  1.00 82.99           N  
ATOM   4274  CA  CYS A 558      -0.700  13.312  51.975  1.00 83.78           C  
ATOM   4275  C   CYS A 558       0.659  13.864  52.401  1.00 84.79           C  
ATOM   4276  O   CYS A 558       1.144  13.557  53.488  1.00 84.52           O  
ATOM   4277  CB  CYS A 558      -0.502  11.936  51.353  1.00 84.88           C  
ATOM   4278  SG  CYS A 558      -1.509  10.596  52.059  1.00 84.68           S  
ATOM   4279  N   CYS A 559       1.285  14.658  51.540  1.00 86.24           N  
ATOM   4280  CA  CYS A 559       2.583  15.231  51.873  1.00 88.37           C  
ATOM   4281  C   CYS A 559       2.384  16.644  52.406  1.00 90.18           C  
ATOM   4282  O   CYS A 559       3.318  17.445  52.469  1.00 90.99           O  
ATOM   4283  CB  CYS A 559       3.497  15.244  50.645  1.00 87.12           C  
ATOM   4284  SG  CYS A 559       3.983  13.594  50.059  1.00 86.73           S  
ATOM   4285  N   LYS A 560       1.143  16.929  52.785  1.00 91.85           N  
ATOM   4286  CA  LYS A 560       0.751  18.222  53.332  1.00 92.62           C  
ATOM   4287  C   LYS A 560      -0.158  17.924  54.525  1.00 94.49           C  
ATOM   4288  O   LYS A 560      -0.874  18.801  55.010  1.00 95.10           O  
ATOM   4289  CB  LYS A 560      -0.024  19.027  52.276  1.00 91.18           C  
ATOM   4290  CG  LYS A 560       0.237  20.528  52.297  1.00 89.30           C  
ATOM   4291  N   ALA A 561      -0.094  16.684  55.010  1.00 95.73           N  
ATOM   4292  CA  ALA A 561      -0.958  16.239  56.101  1.00 96.97           C  
ATOM   4293  C   ALA A 561      -0.339  15.900  57.456  1.00 97.99           C  
ATOM   4294  O   ALA A 561       0.767  15.354  57.545  1.00 96.76           O  
ATOM   4295  CB  ALA A 561      -1.796  15.048  55.622  1.00 96.78           C  
ATOM   4296  N   ASP A 562      -1.096  16.226  58.508  1.00 99.49           N  
ATOM   4297  CA  ASP A 562      -0.720  15.939  59.895  1.00 99.68           C  
ATOM   4298  C   ASP A 562      -0.589  14.416  59.954  1.00100.00           C  
ATOM   4299  O   ASP A 562      -1.483  13.704  59.489  1.00100.00           O  
ATOM   4300  CB  ASP A 562      -1.840  16.354  60.869  1.00 99.75           C  
ATOM   4301  CG  ASP A 562      -1.934  17.857  61.080  1.00100.00           C  
ATOM   4302  OD1 ASP A 562      -1.123  18.599  60.486  1.00100.00           O  
ATOM   4303  OD2 ASP A 562      -2.826  18.293  61.846  1.00 98.96           O  
ATOM   4304  N   ASP A 563       0.501  13.910  60.526  1.00 99.66           N  
ATOM   4305  CA  ASP A 563       0.687  12.460  60.611  1.00 99.52           C  
ATOM   4306  C   ASP A 563       0.758  11.903  59.176  1.00 99.54           C  
ATOM   4307  O   ASP A 563      -0.155  11.235  58.691  1.00100.00           O  
ATOM   4308  CB  ASP A 563      -0.483  11.848  61.405  1.00 99.75           C  
ATOM   4309  CG  ASP A 563      -0.816  10.427  60.988  1.00100.00           C  
ATOM   4310  OD1 ASP A 563       0.119   9.624  60.780  1.00100.00           O  
ATOM   4311  OD2 ASP A 563      -2.023  10.114  60.870  1.00100.00           O  
ATOM   4312  N   LYS A 564       1.873  12.192  58.514  1.00 98.75           N  
ATOM   4313  CA  LYS A 564       2.127  11.810  57.127  1.00 96.53           C  
ATOM   4314  C   LYS A 564       1.930  10.357  56.674  1.00 95.14           C  
ATOM   4315  O   LYS A 564       1.291  10.116  55.647  1.00 95.66           O  
ATOM   4316  CB  LYS A 564       3.543  12.258  56.745  1.00 96.53           C  
ATOM   4317  N   GLU A 565       2.458   9.395  57.427  1.00 93.28           N  
ATOM   4318  CA  GLU A 565       2.379   7.985  57.033  1.00 92.47           C  
ATOM   4319  C   GLU A 565       1.054   7.231  57.132  1.00 91.25           C  
ATOM   4320  O   GLU A 565       0.953   6.098  56.659  1.00 90.16           O  
ATOM   4321  CB  GLU A 565       3.456   7.181  57.770  1.00 94.01           C  
ATOM   4322  CG  GLU A 565       3.692   5.785  57.196  1.00 96.55           C  
ATOM   4323  CD  GLU A 565       4.220   5.805  55.771  1.00 99.19           C  
ATOM   4324  OE1 GLU A 565       4.426   6.907  55.215  1.00100.00           O  
ATOM   4325  OE2 GLU A 565       4.430   4.712  55.203  1.00100.00           O  
ATOM   4326  N   THR A 566       0.040   7.831  57.739  1.00 91.05           N  
ATOM   4327  CA  THR A 566      -1.248   7.156  57.846  1.00 90.90           C  
ATOM   4328  C   THR A 566      -2.058   7.555  56.624  1.00 90.26           C  
ATOM   4329  O   THR A 566      -2.728   6.730  56.001  1.00 91.33           O  
ATOM   4330  CB  THR A 566      -2.013   7.572  59.130  1.00 90.75           C  
ATOM   4331  N   CYS A 567      -1.976   8.834  56.279  1.00 88.50           N  
ATOM   4332  CA  CYS A 567      -2.692   9.344  55.126  1.00 86.81           C  
ATOM   4333  C   CYS A 567      -2.254   8.534  53.910  1.00 85.73           C  
ATOM   4334  O   CYS A 567      -3.039   8.308  52.989  1.00 86.82           O  
ATOM   4335  CB  CYS A 567      -2.383  10.835  54.932  1.00 86.43           C  
ATOM   4336  SG  CYS A 567      -2.826  11.513  53.299  1.00 86.51           S  
ATOM   4337  N   PHE A 568      -0.998   8.090  53.923  1.00 82.73           N  
ATOM   4338  CA  PHE A 568      -0.438   7.308  52.828  1.00 78.95           C  
ATOM   4339  C   PHE A 568      -0.852   5.847  52.916  1.00 76.79           C  
ATOM   4340  O   PHE A 568      -0.877   5.141  51.911  1.00 76.28           O  
ATOM   4341  CB  PHE A 568       1.089   7.407  52.836  1.00 78.95           C  
ATOM   4342  CG  PHE A 568       1.629   8.505  51.967  1.00 79.43           C  
ATOM   4343  CD1 PHE A 568       1.562   8.410  50.579  1.00 80.05           C  
ATOM   4344  CD2 PHE A 568       2.201   9.637  52.533  1.00 79.72           C  
ATOM   4345  CE1 PHE A 568       2.057   9.431  49.767  1.00 79.58           C  
ATOM   4346  CE2 PHE A 568       2.699  10.664  51.733  1.00 79.90           C  
ATOM   4347  CZ  PHE A 568       2.626  10.560  50.347  1.00 79.98           C
[truncated: 31,105 more chars]
